# Supplementary material
Source: ML conference proceedings conference paper supplement (https://openreview.net/forum?id=GEKTIKvslP)
Supplement: supplementary_material [file attachment]

---

# Fair Exploration via Axiomatic Bargaining

---

Anonymous Author(s)

Affiliation

Address

email

## Abstract

Motivated by the consideration of fairly sharing the cost of exploration between multiple groups in learning problems, we develop the Nash bargaining solution in the context of multi-armed bandits. Specifically, the ‘grouped’ bandit associated with any multi-armed bandit problem associates, with each time step, a single group from some finite set of groups. The utility gained by a given group under some learning policy is naturally viewed as the reduction in that group’s regret relative to the regret that group would have incurred ‘on its own’. We derive policies that yield the Nash bargaining solution relative to the set of incremental utilities possible under any policy. We show that on the one hand, the ‘price of fairness’ under such policies is limited, while on the other hand, regret optimal policies are arbitrarily unfair under generic conditions. Our theoretical development is complemented by a case study on contextual bandits for warfarin dosing where we are concerned with the cost of exploration across multiple races and age groups.

## 1 Introduction

Exploration in learning problems has an implicit cost, inasmuch that exploring actions that are eventually revealed to be sub-optimal incurs regret. We study how this cost of exploration is shared in a system with multiple stakeholders. At the outset, we present two motivating examples.

**Personalized Medicine and Adaptive Trials:** Multi-stage, adaptive designs [1, 2, 3, 4], are widely viewed as a frontier in clinical trials. More generally, the ability to collect detailed patient level data, and real time monitoring (eg. glucose monitoring for diabetes [5, 6]) has raised the specter of learning personalized treatments. Among other formulations, such problems may be viewed as contextual bandits. For instance, for the problem of optimal warfarin dosing [7], the context at each time step corresponds to a patient’s covariates, arms correspond to different dosages of warfarin, and the reward is the observed efficacy of the assigned dose. In examining such a study in retrospect, it is natural to measure the regret incurred by distinct groups of patients (eg. by race or age). What makes a profile of regret across such groups fair or unfair?

**Revenue Management for Search Advertising:** Ad platforms enjoy a tremendous amount of flexibility in the choice of ads served against search queries. Specifically, this flexibility exists both in selecting a slate of advertisers to compete for a specific search, and then in picking a winner from this slate. Now a key goal for the platform is learning the affinity of any given ad for a given search. In solving such a learning problem – for which many variants have been proposed [8, 9] – we may again ask the question of who bears the cost of exploration, and whether the profile of such costs across various groups of advertisers is fair.

### 1.1 Bandits, Groups and Axiomatic Bargaining

Delaying a formal development to later, any bandit problem has an associated ‘grouped’ variant. Specifically, we are given a finite set of groups (eg. races or age groups in the warfarin example), and

each group is associated with an arrival probability and a distribution over action sets. At each time step, a group and an action set is drawn from this distribution from which the learning algorithm must pick an action. Heterogeneity in groups is thus driven by differences in their respective distributions over feasible action sets. In addition to measuring overall regret, we also care about the regret incurred by specific groups, which we can view as the cost of exploration borne by that group.

In reasoning about ‘fair’ regret profiles we turn to the theory of axiomatic bargaining. There, a central decision maker is concerned with the incremental utility earned by each group from collaborating, relative to the utility the group would earn on its own. Here this incremental utility is precisely the reduction in regret for any given group relative to the optimal regret that group would have incurred ‘on its own’. A *bargaining solution* maximizes some objective function over the set of achievable incremental utilities. The *utilitarian solution*, for instance, maximizes the sum of incremental utilities which would reduce here to the usual objective of minimizing total regret. The *Nash bargaining solution* maximizes an alternative objective, the Nash Social Welfare (SW) function. This latter solution is the unique solution to satisfy a set of axioms any ‘fair’ solution would reasonably satisfy. *This paper develops the Nash bargaining solution to the (grouped) bandit problem.*

## 1.2 Contributions

In developing the Nash bargaining solution, we focus primarily on what is arguably the simplest non-trivial grouped bandit setting. Specifically, we consider the ‘grouped’  $K$ -armed bandit model, wherein each group corresponds to a subset of the  $K$  arms. We make the following contributions relative to this problem:

*Regret Optimal Policies are Unfair (Theorem 3.1):* We show that all regret optimal policies for the grouped  $K$ -armed bandit share a structural property that make them ‘arbitrarily unfair’ – in the sense that the Nash SW is  $-\infty$  for these solutions – under a broad set of conditions on the problem instance.

*Achievable Fairness (Theorem 3.2):* We derive an instance-dependent upper bound on the Nash SW for the grouped  $K$ -armed bandit. This can be viewed as a ‘fair’ analogue to a regret lower bound (e.g. [10]) for the problem, since a lower bound on achievable regret (forgoing any fairness concerns) would in effect correspond to an upper bound on the utilitarian SW for the problem.

*Nash Solution (Theorem 4.1):* We produce a policy that achieves the Nash solution. Specifically, the Nash SW under this policy achieves the upper bound we derive on the Nash SW for all instances of the grouped  $K$ -armed bandit.

*Price of Fairness for the Nash Solution (Theorem 4.2):* We show that the ‘price of fairness’ for the Nash solution is small: the Nash solution achieves at least  $O(1/\sqrt{G})$  of the reduction in regret achieved under a regret optimal solution relative to the regret incurred when groups operate separately.

Taken together, these results establish a rigorous framework for the design of bandit algorithms that yield fair outcomes across groups at a low cost to total regret. As a final contribution, we extend our framework beyond the grouped  $K$ -armed bandit and undertake an empirical study:

*Linear Contextual Bandits and Warfarin Dosing:* We extend our framework to grouped linear contextual bandits, yielding a candidate Nash solution there. Applied to a real-world dataset on warfarin dosing using race and age groups, we show (a) a regret optimal solution that ignores groups is dramatically unfair, and (b) the Nash solution balances out reductions in regret across groups at the cost of a small increase in total regret.

## 1.3 Related Literature

Two pieces of prior work have a motivation similar to our own. [11] studies a setting with multiple agents with a common bandit problem, where each agent can decide which action to take at each time. They show that ‘free-riding’ is possible — an agent that can access information from other agents can incur only  $O(1)$  regret in several classes of problems. This is consistent with our motivation. [12] studies a very similar grouped bandit model to ours, and provides a ‘counterexample’ in which a group can have a negative externality on another group. This example is somewhat pathological and stems from considering an instance-specific fixed time horizon; instead, if  $T \rightarrow \infty$ , all externalities become non-negative (details in Appendix A.1). Our grouped bandit model is also similar to *sleeping bandits* [13], in which the set of available arms is adversarially chosen in each round. The known, fixed group structure in our model allows us to achieve tighter regret bounds than [13].

There have also been a handful of papers [14, 15, 16, 17] that study ‘fairness in bandits’ in a completely different context. These works enforce a fairness criterion between *arms*, which is relevant in settings where a ‘pull’ represents some resource that is allocated to that arm, and these pulls should be distributed between arms in a fair manner. In these models, the decision maker’s objective (maximize reward) is distinct from that of a group (obtain ‘pulls’), unlike our setting (and motivating examples) where the groups and decision maker are aligned in their eventual objective.

Our upper bound on Nash SW borrows classic techniques from the regret lower bound results of [10] and [18]. Our policy follows a similar pattern to recent work on regret-optimal, optimization-based policies for structured bandits [19, 20, 21, 22]. Unlike those policies, our policy has no forced exploration. Further the optimization problem defining the Nash solution can generically have multiple solutions whereas the aforementioned approaches would require this solution to be unique; our approach does not require a unique solution. Nonetheless, we believe that the framework in the aforementioned works can be fruitfully leveraged to construct Nash solutions for general grouped bandits, and we provide such a candidate solution as an extension.

Our fairness framework is inspired by the literature on fairness in welfare economics — see [23, 24]. Specifically, we study fairness in exploration through the lens of the axiomatic bargaining framework, first studied by [25], who showed that enforcing four desirable axioms induces a unique fair solution. [26] is an excellent textbook reference for this topic.

## 2 The Axiomatic Bargaining Framework for Bandits

Let  $\theta \in \Theta$  be an unknown parameter and let  $\mathcal{A}$  be the action set. For every arm  $a \in \mathcal{A}$ ,  $(Y_n(a))_{n \geq 1}$  is an i.i.d. sequence of rewards drawn from a distribution  $F(\theta, a)$  parameterized by  $\theta$  and  $a$ . We let  $\mu(a) = \mathbb{E}[Y_1(a)]$  be the expected reward of arm  $a$ . In defining a *grouped* bandit problem, we let  $\mathcal{G}$  be a set of  $G$  groups. Each group  $g \in \mathcal{G}$  is associated with a probability distribution  $P^g$  over  $2^{\mathcal{A}}$ , and a probability of arrival  $p_g$ ;  $\sum_g p_g = 1$ . The identity of the group arriving at time  $t$ ,  $g_t$ , is chosen independently according to this latter distribution;  $\mathcal{A}_t$  is then drawn according to  $P^{g_t}$ . An instance of the grouped bandit problem is specified by  $\mathcal{I} = (\mathcal{A}, \mathcal{G}, p, P, F, \theta)$ , where all quantities except for  $\theta$  are known. At each time  $t$ , a central decision maker observes  $g_t$  and  $\mathcal{A}_t$ , chooses an arm  $A_t \in \mathcal{A}_t$  to pull and observes the reward  $Y_{N_t(A_t)+1}(A_t)$ , where  $N_t(a)$  is the total number of times arm  $a$  was pulled up to but not including time  $t$ . Let  $A_t^* \in \arg\max_{a \in \mathcal{A}_t} \mu(a)$  be an optimal arm at time  $t$ . Given an instance  $\mathcal{I}$  and a policy  $\pi$ , the *total regret*, and the *group regret* for group  $g \in \mathcal{G}$  are respectively

$$R_T(\pi, \mathcal{I}) = \mathbb{E} \left[ \sum_{t=1}^T (\mu(A_t^*) - \mu(A_t)) \right] \text{ and } R_T^g(\pi, \mathcal{I}) = \mathbb{E} \left[ \sum_{t=1}^T \mathbf{1}(g_t = g) (\mu(A_t^*) - \mu(A_t)) \right],$$

where the expectation is over randomness in arrivals  $(g_t, \mathcal{A}_t)$ , rewards  $Y_n(a)$ , and the policy  $\pi$ . Finally, so that the notion of an optimal policy for some class of instances,  $\mathcal{I}$ , is well defined, we restrict attention to *consistent* policies which yield sub-polynomial regret for any instance in that class:  $\Psi = \{\pi : R_T(\pi, \mathcal{I}) = o(T^b) \forall \mathcal{I} \in \mathcal{I}, \forall b > 0\}$ .

### 2.1 Background: Axiomatic Bargaining

The axiomatic bargaining problem is specified by the number of agents  $n$ , a set of feasible utility profiles  $U \subseteq \mathbb{R}^n$ , and a disagreement point  $d \in \mathbb{R}^n$ , that represents the utility profile when agents cannot come to an agreement. A solution  $f(\cdot, \cdot)$  to the bargaining problem selects an agreement  $u^* = f(U, d) \in U$ , in which agent  $i$  receives utility  $u_i^*$ . It is assumed that there is at least one point  $u \in U$  such that  $u > d$ , and we assume  $U$  is compact and convex.

The bargaining framework proposes a set of axioms a fair solution  $u^*$  should ideally satisfy:

- (a) *Pareto Optimality*: There is no  $u \in U$  with  $u \geq u^*$ ,  $u \neq u^*$ .
- (b) *Invariance to Affine Transformations*: If  $U' = \{a^\top u + b : u \in U\}$  and  $d' = a^\top d + b$ , then  $f(U', d')_i = a_i u_i^* + b_i$  for any  $a \in \mathbb{R}_+^n$ ,  $b \in \mathbb{R}^n$ .
- (c) *Independence of Irrelevant Alternatives*: If  $V \subseteq U$  where  $u^* \in V$ , then  $f(V, d) = u^*$ .
- (d) *Symmetry*: If  $U$  and  $d$  are symmetric,  $u_i^* = u_j^* \forall i, j$ .

Now (b) implies that  $f(U, d) = f(\{u - d : u \in U\}, 0) + d$ . It is therefore customary to normalize the origin to the disagreement point, i.e. assume  $d = 0$ , and implicitly that  $U$  has been appropriately translated. So translated,  $U$  is interpreted as a set of feasible utility *gains* relative to the disagreement

point. The seminal work of [25] showed that there is a unique bargaining solution that satisfies the above four axioms, and it is the outcome that maximizes the *Nash social welfare (SW) function* [27]:

$$W(u) = \begin{cases} \sum_{i=1}^n \log(u_i) & u_i > 0 \forall i \in [n] \\ -\infty & \text{otherwise.} \end{cases}$$

We will interchangeably refer to  $u^* = \operatorname{argmax}_{u \in U} W(u)$  as the *Nash solution* or as *proportionally fair*. If  $u \in U$  such that  $W(u) = -\infty$ , we say that  $u$  is *unfair*.

## 2.2 Fairness Framework for Grouped Bandits

We now consider the Nash bargaining solution in the context of the grouped bandit problem. To do so, we need to appropriately define the utility gain under any policy. We begin by formalizing the rewards to a single group under a policy where no information was shared across groups, which represents the disagreement point. Specifically, let  $\mathcal{I}_g$  be the ‘single-group’ bandit instance obtained by considering the instance  $\mathcal{I}$  restricted to arrivals of group  $g$  so that in any period  $t$  in which  $g_t \neq g$ , we receive no reward under any action. Let us denote by  $\pi_g^*$  an optimal policy for instances of type  $\mathcal{I}_g$  (i.e.  $\pi_g^*$  is optimal in the non-grouped bandit setting) so that for any instance of type  $\mathcal{I}_g$ , and any other consistent policy  $\pi'_g$  for instances of that type,

$$(1) \quad \limsup_{T \rightarrow \infty} \frac{R_T(\pi_g^*, \mathcal{I}_g)}{\log T} \leq \liminf_{T \rightarrow \infty} \frac{R_T(\pi'_g, \mathcal{I}_g)}{\log T}.$$

Now letting  $\tilde{R}_T^g(\mathcal{I}) \triangleq R_T(\pi_g^*, \mathcal{I}_g)$ , we define, with a slight abuse of notation, the  $T$ -period utility earned by group  $g$  under  $\pi_g^*$ , and any other consistent policy  $\pi$  for instances of type  $\mathcal{I}$  respectively, as:

$$\mathbb{E} \left[ \sum_{t=1}^T \mathbf{1}(g_t = g) \mu(A_t^*) \right] - \tilde{R}_T^g(\mathcal{I}) \triangleq u_T^g(\pi_g^*) \text{ and } \mathbb{E} \left[ \sum_{t=1}^T \mathbf{1}(g_t = g) \mu(A_t) \right] - R_T^g(\pi, \mathcal{I}) \triangleq u_T^g(\pi).$$

The  $T$ -period utility gain under a policy  $\pi$  is then  $u_T^g(\pi) - u_T^g(\pi_g^*) = \tilde{R}_T^g(\mathcal{I}) - R_T^g(\pi, \mathcal{I})$ . Since our goal is to understand long-run system behavior, we define asymptotic utility gain for any group  $g$ :

$$\text{UtilGain}^g(\pi, \mathcal{I}) = \liminf_{T \rightarrow \infty} \frac{\tilde{R}_T^g(\mathcal{I}) - R_T^g(\pi, \mathcal{I})}{\log T}.$$

Equipped with this definition, we may now identify the set of incremental utilities for an instance  $\mathcal{I}$ , as  $U(\mathcal{I}) = \{(\text{UtilGain}^g(\pi, \mathcal{I}))_{g \in \mathcal{G}} : \pi \in \Psi\}$ . We can readily show that the Nash solution remains the unique solution satisfying the fairness axioms presented in Section 2.1 relative to  $U(\mathcal{I})$ . We finish up by finally defining the Nash solution to the grouped bandit problem. Since we find it convenient to associate a SW function with a policy (as opposed to a vector of incremental utilities), the Nash SW function for grouped bandits is equivalently defined as:

$$(2) \quad W(\pi, \mathcal{I}) = \begin{cases} \sum_{g \in \mathcal{G}} \log(\text{UtilGain}^g(\pi, \mathcal{I})) & \text{UtilGain}^g(\pi, \mathcal{I}) > 0 \forall g \in \mathcal{G} \\ -\infty & \text{otherwise.} \end{cases}$$

So equipped, we finish by defining the Nash solution to the grouped bandit problem.

**Definition 2.1.** Suppose a policy  $\pi^*$  satisfies  $W(\pi^*, \mathcal{I}) = \sup_{\pi \in \Psi} W(\pi, \mathcal{I})$  for every instance  $\mathcal{I} \in \mathcal{I}$ . Then, we say that  $\pi^*$  is the Nash solution for  $\mathcal{I}$  and that it is *proportionally fair*.

## 2.3 Grouped $K$ -armed Bandit Model

The grouped  $K$ -armed bandit is arguably the simplest non-trivial class of grouped bandits. Let  $\mathcal{A} = [K]$ . Denote by  $\mathcal{A}^g \subseteq \mathcal{A}$  a subset of arms corresponding to group  $g$  and by  $\mathcal{G}_a$  a subset of groups corresponding to arm  $a$ . For each  $g$ ,  $P^g$  places unit mass on  $\mathcal{A}^g$  so that the set of arms available at time  $t$  is  $\mathcal{A}_t = \mathcal{A}^{g_t}$ . Assume  $\theta \in (0, 1)^K$ , and the single period reward  $Y_1(a) \sim \text{Bernoulli}(\theta(a))$ . We assume that  $\theta(a) \neq \theta(a')$  for all  $a \neq a'$ . Since the set of arms available at each time step only depends on the arriving group, we denote by  $\text{OPT}(g) = \max_{a \in \mathcal{A}^g} \theta(a)$  the optimal mean reward for group  $g$ . We take  $\pi_g^*$  to be the KL-UCB policy of [28] since KL-UCB is optimal (in the sense of (1)) for vanilla  $K$ -armed bandits. We may write the  $T$ -period regret in this model as

$$(3) \quad R_T(\pi, \mathcal{I}) = \sum_{g \in \mathcal{G}} \sum_{a \in \mathcal{A}^g} \Delta^g(a) \mathbb{E}[N_T^g(a)],$$

where  $N_T^g(a)$  is the number of times that group  $g$  has pulled arm  $a$  after  $T$  time steps, and  $\Delta^g(a) = \text{OPT}(g) - \theta(a)$ . Lastly, we state a condition guaranteeing  $U(\mathcal{I})$  contains a point  $u > 0$ ; Proposition G.1 in Appendix G proves the following assumption is necessary and sufficient:

**Assumption 2.2.** *Every group  $g$  has at least one suboptimal arm that is shared with another group. That is, for every  $g$ ,  $\exists a \in \mathcal{A}^g$  such that  $\mu(a) < \text{OPT}(g)$  and  $|\mathcal{G}_a| \geq 2$ .*

### 3 Fairness-Regret Trade-off

In this section, we prove that a regret-optimal policy for a generic grouped  $K$ -armed bandit must necessarily be unfair. We then turn to deriving an upper bound on achievable Nash SW.

#### 3.1 Unfairness of Regret Optimal Policies

We first state the main result, which states that regret optimal policies are arbitrarily unfair. In fact, we show that perversely the most ‘disadvantaged’ group (in a sense we make precise shortly) bears the brunt of exploration in that it sees no improvement in regret relative to if it were ‘on its own’.

**Theorem 3.1.** *Let  $\pi$  be a regret optimal policy. Let  $\mathcal{I}$  be an instance of the grouped  $K$ -armed bandit where  $g_{\min} \triangleq \arg\min_{g \in G} \text{OPT}(g)$  is unique. Then,  $W_{\mathcal{I}}(\pi) = -\infty$  and  $\text{UtilGain}^{g_{\min}}(\pi, \mathcal{I}) = 0$ .*

*Proof.* We define regret optimality by proving tight lower and upper bounds on regret, and these bounds imply necessary properties of all regret optimal policies that yield the desired result.

We first lower bound the total number of pulls,  $\mathbb{E}[N_T(a)]$ , of a suboptimal arm. Denote by  $\mathcal{A}_{\text{sub}}^g = \{a \in \mathcal{A}^g : \theta(a) < \text{OPT}(g)\}$  the suboptimal actions for group  $g$ , and denote by  $\mathcal{A}_{\text{sub}} = \{a \in \mathcal{A} : a \in \mathcal{A}_{\text{sub}}^g \forall g \in \mathcal{G}_a\}$  the set of arms that are not optimal for any group. Now since a consistent policy for the grouped  $K$ -armed bandit is automatically consistent for the vanilla  $K$ -armed bandit obtained by restricting to any of its component groups  $g$ , the standard lower bound of [10] implies that for any  $a \in \mathcal{A}_{\text{sub}}$ ,  $\liminf_{T \rightarrow \infty} \mathbb{E}[N_T(a)] / \log T(g) \geq J^g(a)$  where  $J^g(a) \triangleq 1 / \text{KL}(\theta(a), \text{OPT}(g))$  and  $T(g)$  is the number of arrivals of group  $g$  up to and including time  $T$ . Since this must hold for any group, and since  $\lim_T \log T / \log T(g) = 1$  a.s.,

$$(4) \quad \liminf_{T \rightarrow \infty} \frac{\mathbb{E}[N_T(a)]}{\log T} \geq J(a)$$

for all  $a \in \mathcal{A}_{\text{sub}}$  where  $J(a) = \max_{g \in \mathcal{G}_a} J^g(a)$ . Now, denote by  $\Gamma(a) = \arg\min_{g \in \mathcal{G}_a} \text{OPT}(g)$  the set of groups that have the smallest optimal reward out of all groups that have access to  $a$ . Then the smallest regret incurred in pulling arm  $a$  is simply  $\Delta^g(a)$  for any  $g \in \Gamma(a)$ . With a slight abuse, we denote this quantity by  $\Delta^{\Gamma(a)}(a)$ . (4) immediately implies that for any consistent policy  $\pi$ ,

$$(5) \quad \liminf_{T \rightarrow \infty} \frac{R_T(\pi, \mathcal{I})}{\log T} \geq \sum_{a \in \mathcal{A}_{\text{sub}}} \Delta^{\Gamma(a)}(a) J(a).$$

In fact, we show that the KL-UCB policy [28] (surprisingly) achieves this lower bound; the proof of this claim is somewhat involved and can be found in Appendix C. Consequently, any regret optimal policy must achieve the limit infimum in (5). In turn, this implies that a policy  $\pi \in \Psi$  is regret optimal if and only if, the number of pulls of arms  $a \in \mathcal{A}_{\text{sub}}$  achieve the lower bound (4), i.e.

$$(6) \quad \lim_{T \rightarrow \infty} \frac{\mathbb{E}[N_T(a)]}{\log T} = J(a) \quad \forall a \in \mathcal{A}_{\text{sub}}$$

and further that any pulls of arm  $a$  from a group  $g \notin \Gamma(a)$  must be negligible, i.e.

$$(7) \quad \lim_{T \rightarrow \infty} \frac{\mathbb{E}[N_T^g(a)]}{\log T} = 0 \quad \forall a \in \mathcal{A}, g \notin \Gamma(a).$$

Now, turning our attention to  $g_{\min}$ , we have by assumption that  $g_{\min}$  is the only group in  $\Gamma(a)$  for all  $a \in \mathcal{A}^{g_{\min}}$ . Consequently, by (7), we must have that for any optimal policy,  $\lim_{T \rightarrow \infty} \mathbb{E}[N_T^{g_{\min}}(a)] / \log T = \lim_{T \rightarrow \infty} \mathbb{E}[N_T(a)] / \log T$  for all  $a \in \mathcal{A}^{g_{\min}}$ . And since  $J(a) = J^{g_{\min}}(a)$  for all  $a \in \mathcal{A}^{g_{\min}} \cap \mathcal{A}_{\text{sub}}$ , (6) then implies that the regret for group  $g_{\min}$  is precisely

$$\lim_{T \rightarrow \infty} \frac{R_T^{g_{\min}}(\pi, \mathcal{I})}{\log T} = \sum_{a \in \mathcal{A}_{\text{sub}}^{g_{\min}}} \Delta^{g_{\min}}(a) J^{g_{\min}}(a).$$

210 But this is precisely  $\lim_T \tilde{R}_T^{g_{\min}}(\mathcal{I})/\log T$ . Thus,  $\text{UtilGain}^{g_{\min}}(\pi, \mathcal{I}) = 0$ , and  $W_{\mathcal{I}}(\pi) = -\infty$ .  $\square$

211 The proof also illustrates that if  $g_{\max} \triangleq \arg\max_{g \in G} \text{OPT}(g)$  is unique, then  $g_{\max}$  incurs no regret  
 212 from *any* shared arm in a regret optimal policy. If all suboptimal arms for  $g_{\max}$  are shared with another  
 213 group, then  $g_{\max}$  incurs zero (log-scaled) regret in an optimal policy. In summary, regret optimal  
 214 policies are unfair, and achieve perverse outcomes with the most disadvantaged groups gaining  
 215 nothing and the most advantaged groups gaining the most from sharing the burden of exploration.

### 216 3.2 Upper Bound on Nash SW

217 The preceding question motivates asking what is in fact possible with respect to fair outcomes. To  
 218 that end, we derive an instance-dependent upper bound on the Nash SW. We may view this as a ‘fair’  
 219 analogue to instance-dependent lower bounds on regret.

220 Recall the definition of  $W(\pi, \mathcal{I})$  in (2), and let  $W^*(\mathcal{I}) = \sup_{\pi \in \Psi} W(\pi, \mathcal{I})$ . Fix an instance  $\mathcal{I}$  with  
 221 unknown parameter vector  $\theta$ . We first upper bound  $W(\pi, \mathcal{I})$ . Recall that KL-UCB is the policy  $\pi_g^*$   
 222 used to define  $\tilde{R}_T^g(\mathcal{I})$ . The fact that KL-UCB is optimal in the vanilla  $K$ -armed bandit implies:

$$(8) \quad \lim_{T \rightarrow \infty} \frac{\tilde{R}_T^g(\mathcal{I})}{\log T} = \sum_{a \in \mathcal{A}_{\text{sub}}^g} \Delta^g(a) J^g(a).$$

223 Next, we re-write  $R_T^g(\pi, \mathcal{I})/\log T$ . Given a policy  $\pi$ , for any action  $a$  and group  $g$ , let  $q_T^g(a, \pi) \in$   
 224  $[0, 1]$  be the *percentage* of times that group  $g$  pulls arm  $a$ , out of the total number of times arm  $a$  is  
 225 pulled. That is,  $\mathbb{E}[N_T^g(a)] = q_T^g(a, \pi) \mathbb{E}[N_T(a)]$ , where  $\sum_{g \in G} q_T^g(a, \pi) = 1$  for all  $a$ . Then,

$$(9) \quad \frac{R_T^g(\pi, \mathcal{I})}{\log T} = \sum_{a \in \mathcal{A}_{\text{sub}}^g} \Delta^g(a) q_T^g(a, \pi) \frac{\mathbb{E}[N_T(a)]}{\log T} \geq \sum_{a \in \mathcal{A}_{\text{sub}}^g \cap \mathcal{A}_{\text{sub}}} \Delta^g(a) q_T^g(a, \pi) \frac{\mathbb{E}[N_T(a)]}{\log T}.$$

226 Recalling  $\text{UtilGain}^g(\pi, \mathcal{I}) = \liminf_{T \rightarrow \infty} \frac{\tilde{R}_T^g(\mathcal{I}) - R_T^g(\pi, \mathcal{I})}{\log T}$ , combining (8), (9), and (4) yields:

$$\text{UtilGain}^g(\pi, \mathcal{I}) \leq \liminf_{T \rightarrow \infty} \sum_{a \in \mathcal{A}_{\text{sub}}^g} \Delta^g(a) (J^g(a) - q_T^g(a, \pi) J(a) \mathbf{1}\{a \in \mathcal{A}_{\text{sub}}\}).$$

227 Using the definition of  $W(\pi, \mathcal{I})$  and taking the  $\liminf$  outside of the sum gives

$$W(\pi, \mathcal{I}) \leq \liminf_{T \rightarrow \infty} \sum_{g \in G} \log \left( \sum_{a \in \mathcal{A}_{\text{sub}}^g} \Delta^g(a) (J^g(a) - q_T^g(a, \pi) J(a) \mathbf{1}\{a \in \mathcal{A}_{\text{sub}}\}) \right)^+.$$

228 But since  $\sum_{g \in G} q_T^g(a, \pi) = 1$  for every  $T, a$ , it must be that the limit infimum above is achieved for  
 229 some vector  $(q^g(a))$  satisfying  $\sum_{g \in G} q^g(a) = 1$  for all  $a$ . This immediately yields an upper bound  
 230 on  $W^*(\mathcal{I})$ : Let  $Y^*(\mathcal{I})$  be the optimal value to the program  $P(\theta)$ , and let  $q_*$  be an optimal solution.

$$(P(\theta)) \quad \begin{aligned} & \max_{q \geq 0} \quad \sum_{g \in G} \log \left( \sum_{a \in \mathcal{A}_{\text{sub}}^g} \Delta^g(a) (J^g(a) - q^g(a) J(a)) \right)^+ \\ & \text{s.t.} \quad \sum_{g \in G} q^g(a) = 1 \quad \forall a \in \mathcal{A}_{\text{sub}} \\ & \quad \quad q^g(a) = 0 \quad \forall g \in G, a \notin \mathcal{A}_{\text{sub}} \cap \mathcal{A}_g. \end{aligned}$$

231 Then, we have shown:

232 **Theorem 3.2.** *For every instance  $\mathcal{I}$  of the grouped  $K$ -armed bandit,  $W^*(\mathcal{I}) \leq Y^*(\mathcal{I})$ .*

## 233 4 Nash Solution for Grouped $K$ -armed Bandits

234 We turn our attention in this section to constructive issues: we first develop an algorithm that achieves  
 235 the Nash SW upper bound of Theorem 3.2 and thus establish that this is the Nash solution for the  
 236 grouped  $K$ -armed bandit. In analogy to the unfairness of a regret optimal policy, it is then natural to  
 237 ask whether the regret under this Nash solution is large relative to optimal regret; we show thankfully  
 238 that this ‘price of fairness’ is relatively small.

## 4.1 The Nash Solution: PF-UCB

The algorithm we present here ‘Proportionally Fair’ UCB (or PF-UCB) works as follows: at each time step it computes the set of arms that optimize the (KL) UCB for some group. Then, when a group arrives, it asks whether any arm from this set has been ‘under-explored’ where the notion of under-exploration is measured relative to an estimated optimal solution to  $P(\theta)$ . Such an arm, if available, is pulled. Absent the availability of such an arm, a greedy selection is made.

Specifically, let  $\hat{\theta}_t$  be the empirical mean estimate of  $\theta$  at time  $t$ .  $P(\hat{\theta}_t)$  is then our approximation to  $P(\theta)$  at time  $t$  and we denote by  $\hat{q}_t$  the optimal solution to this program with smallest euclidean norm. Note that finding such a solution constitutes a tractable convex optimization problem. We define the standard KL-UCB for an arm,  $\text{UCB}_t(a) = \max\{q : N_t(a)\text{KL}(\hat{\theta}_t(a), q) \leq \log t + 3 \log \log t\}$ . Finally, we denote by  $A_t^{\text{UCB}}(g) \in \arg\max_{a \in \mathcal{A}^g} \text{UCB}_t(a)$  the arm with the highest UCB for group  $g$  at time  $t$ , and by  $\mathcal{A}_t^{\text{UCB}} = \{A_t^{\text{UCB}}(g) : g \in \mathcal{G}\}$  the set of arms that have the highest UCB for *some* group. PF-UCB then proceeds as follows. At time  $t$ :

1. If there is an available arm  $a \in \mathcal{A}^{g_t} \cap \mathcal{A}_t^{\text{UCB}}$  such that  $N_t^{g_t}(a) \leq \hat{q}_t^g(a)N_t(a)$ , pull  $a$ . If there are multiple arms matching this criteria, pull one of them uniformly at random.
2. Otherwise, pull the greedy arm  $A_t^{\text{greedy}}(g_t) \in \arg\max_{a \in \mathcal{A}^{g_t}} \hat{\theta}_t(a)$ .

PF-UCB explores at time  $t$  by pulling an arm if it is the arm with the highest UCB for *some* group (not necessarily group  $g_t$ ), and the current group  $g_t$  has not pulled it as many times as it should have according to the solution  $\hat{q}_t$ . PF-UCB constitutes a Nash solution for the grouped  $K$ -armed bandit. Specifically, we prove the following theorem in Appendix E:

**Theorem 4.1.** *For any instance  $\mathcal{I}$  of the grouped  $K$ -armed bandit, we have for all groups  $g$ ,*

$$\lim_{T \rightarrow \infty} \frac{R_T^g(\pi^{\text{PF-UCB}}, \mathcal{I})}{\log T} = \sum_{a \in \mathcal{A}^g} \Delta^g(a) q_*^g(a) J(a).$$

It is worth noting that relative to the existing optimization-based algorithms for structured bandits (e.g. [19, 20, 21, 22]), PF-UCB does no forced sampling. In addition, we make no requirement that the solution to the optimization problem  $P(\theta)$  is unique as these existing policies require. In fact, optimal solutions to  $P(\theta)$  are not unique, and the choice of a solution that has smallest euclidean norm is carefully shown to provide the necessary ‘stability’ while being computationally tractable. That said, the next section shows how we can fruitfully leverage an existing algorithm from [22] to construct a candidate Nash solution for a setting beyond the grouped  $K$ -armed bandit.

## 4.2 Price of Fairness

Whereas PF-UCB is proportionally fair, what price do we pay with respect to regret? To answer this question we compute in this section an upper bound on the ‘price of fairness’. Specifically, define

$$\text{SYSTEM}(\mathcal{I}) = \sum_{g \in \mathcal{G}} \text{UtilGain}^g(\pi^{\text{KL-UCB}}, \mathcal{I}) \text{ and } \text{FAIR}(\mathcal{I}) = \sum_{g \in \mathcal{G}} \text{UtilGain}^g(\pi^{\text{PF-UCB}}, \mathcal{I}).$$

$\text{UtilGain}^g(\pi^{\text{KL-UCB}}, \mathcal{I})$  is the reduction in group  $g$ ’s regret under a *regret optimal* policy in the grouped setting relative to the optimal regret it would have endured on its own;  $\text{SYSTEM}(\mathcal{I})$  aggregates this reduction in regret across all groups. Similarly,  $\text{UtilGain}^g(\pi^{\text{PF-UCB}}, \mathcal{I})$  is the reduction in group  $g$ ’s regret under a *proportionally fair* policy, and  $\text{FAIR}(\mathcal{I})$  aggregates this across groups. The price of fairness (PoF) asks what fraction of the optimal reduction in regret is lost to fairness:

$$\text{PoF}(\mathcal{I}) \triangleq \frac{\text{SYSTEM}(\mathcal{I}) - \text{FAIR}(\mathcal{I})}{\text{SYSTEM}(\mathcal{I})}.$$

Of course,  $\text{PoF}(\mathcal{I})$  is a quantity between 0 and 1, where smaller values are preferable.

Now for an instance  $\mathcal{I}$ , let  $s^g(\mathcal{I}) = \sup_{\pi \in \Psi^+(\mathcal{I})} \text{UtilGain}^g(\pi, \mathcal{I})$  be the maximum achievable utility gain (or equivalent, the largest reduction in regret possible) for group  $g$ , where  $\Psi^+(\mathcal{I}) = \{\pi \in \Psi : \text{UtilGain}^g(\pi, \mathcal{I}) \geq 0 \ \forall g \in \mathcal{G}\}$ . Then,  $R(\mathcal{I}) = \min_{g \in \mathcal{G}} s^g(\mathcal{I}) / \max_{g \in \mathcal{G}} s^g(\mathcal{I})$  is a measure of the inherent asymmetry of the instance  $\mathcal{I}$  with respect to utility gain across groups. We show:

**Theorem 4.2.** *For an instance  $\mathcal{I}$  of the grouped  $K$ -armed bandit,  $\text{PoF}(\mathcal{I}) \leq 1 - R(\mathcal{I})^{\frac{2\sqrt{G}-1}{G}}$ .*

The proof relies on an analysis of the price of fairness for general convex allocation problems in [29] and may be found in Appendix F. The key takeaway from this result is that, treating the inherent asymmetry  $R(\mathcal{I})$  as a constant, the price of fairness grows *sub-linearly* in the number of groups  $G$ . It is unclear we can expect this with other fairness solution concepts: for instance, we would expect the price of fairness under a max-min solution to grow linearly with the number of groups [29]. Further, whereas the bound above depends on the topology of the instance only through  $R(\mathcal{I})$ , a topology specific analysis may well yield stronger results. For instance:

**Proposition 4.3.** *Let  $\mathcal{I}$  be an instance such that for every arm  $a \in \mathcal{A}$ , either  $\mathcal{G}_a = \mathcal{G}$  or  $|\mathcal{G}_a| = 1$ . Then  $\text{PoF}(\mathcal{I}) \leq \frac{1}{2}$ .*

This result shows that for a specific class of topologies, the price of fairness is a constant independent of any parameters including the number of groups or the mean rewards. In Section 6 we study the price of fairness computationally in the context of random families of instances.

## 5 Extension to Grouped Contextual Linear Bandits

In this section, we introduce the grouped linear contextual bandit model and propose a candidate Nash solution by extending the regret optimal policy of [22] (without theory). We apply this model and the policies in Section 6 for an empirical case study.

**Grouped Linear Contextual Bandit Model:** Let  $\theta \in \mathbb{R}^d$  and  $\mathcal{A} \subseteq \mathbb{R}^d$ . The reward for pulling arm  $a$  for the  $n$ 'th time is  $Y_n(a) = \langle a, \theta \rangle + \varepsilon_{a,n}$ , where  $\varepsilon_{a,n}$  is distributed i.i.d.  $N(0, 1)$ . Let  $\mathcal{M} \subseteq \mathbb{R}^d$  be the set of contexts, where  $|\mathcal{M}| = M < \infty$ , and each  $m \in \mathcal{M}$  is associated with an action set  $\mathcal{A}(m) \subseteq \mathcal{A}$ . Each group  $g \in \mathcal{G}$  has a probability of arrival,  $p^g$ , and a distribution  $P^g$  over contexts  $[M]$ . At each time  $t$ , a group  $g_t$  is drawn independently from  $(p^g)_g$ , then a random context  $m_t \sim P^{g_t}$  is drawn. The action set at time  $t$  is  $\mathcal{A}_t = \mathcal{A}(m_t)$ . Let  $\mathcal{M}^g$  be the contexts in the support of  $P^g$ . Let  $\text{OPT}(m) = \max_{a \in \mathcal{A}(m)} \langle a, \theta \rangle$  and  $\Delta(m, a) = \text{OPT}(m) - \langle a, \theta \rangle$ .

**Regret Optimal Policy:** [22] provides an instance-dependent lower bound for linear contextual bandits as the optimal value of the following optimization problem:

$$\begin{aligned} (L(\theta)) \quad & Y(\mathcal{M}) = \min_{Q \geq 0} \sum_{m \in \mathcal{M}} \sum_{a \in \mathcal{A}(m)} Q(m, a) \Delta(m, a) \\ & \text{s.t.} \quad Q(a) = \sum_{m: a \in \mathcal{A}(m)} Q(m, a) \quad \forall a \in \mathcal{A} \\ & \quad (Q(a))_{a \in \mathcal{A}} \in \mathcal{Q}, \end{aligned}$$

where  $\mathcal{Q}$  is the following polytope ensuring the consistency of the policy:

$$\mathcal{Q} = \{(Q(a))_{a \in \mathcal{A}} : \|a\|_{H_Q^{-1}}^2 \leq \Delta(m, a)^2 / 2 \quad \forall m \in [M], a \in \mathcal{A}(m), H_Q = \sum_{a \in \mathcal{A}} Q(a) a a^\top\}.$$

The variable  $Q(m, a)$  represents how often context  $m$  pulls arm  $a$ . [22] provides a policy (OAM) whose regret matches this lower bound. At a high level, like PF-UCB, OAM solves  $L(\hat{\theta}_t)$  at each time step and ‘follows’ the solution; but it does not make use of a UCB and rather uses forced exploration. There are many details in the OAM policy and the full description can be found in Appendix A.2.

**Candidate Nash Solution:** We propose a policy which runs exactly OAM, except that the optimization problem solved at every time step is changed to the following:

$$\begin{aligned} (L^{\text{fair}}(\theta)) \quad & \max_{Q \geq 0} \sum_{g \in \mathcal{G}} \log \left( Y(\mathcal{M}^g) - \sum_{m \in \mathcal{M}^g} \sum_{a \in \mathcal{A}(m)} Q^g(m, a) \Delta(m, a) \right)^+ \\ & \text{s.t.} \quad Q(a) = \sum_{g \in \mathcal{G}} \sum_{m \in \mathcal{M}^g: a \in \mathcal{A}(m)} Q^g(m, a) \quad \forall a \in \mathcal{A} \\ & \quad (Q(a))_{a \in \mathcal{A}} \in \mathcal{Q}. \end{aligned}$$

Compared to  $(L(\theta))$ , the objective is modified to maximize the Nash SW, and the new variable  $Q^g(m, a)$  represents how often group  $g$  with context  $m$  should pull arm  $a$ .

We do not have a theoretical guarantee that this extension of OAM is indeed the Nash solution. This is not implied by [22] since there is an added group structure on the bandit model and OAM requires that the optimization problem has a unique solution, which  $(L^{\text{fair}}(\theta))$  does not. Proving such a guarantee is a natural direction for future work.



## 6 Experiments

We consider two sets of experiments. The first seeks to understand the PoF in synthetic instances to shed further light on the impact of topology. The second is a real-world case study that returns to the Warfarin dosing example discussed in motivating the paper where we seek to understand unfairness under a regret optimal policy and the extent to which the Nash solution can mitigate this problem.

**Synthetic Grouped  $K$ -Armed Bandits:** We consider two generative models that differ in how the bipartite graph matching groups to available arms is generated. In ‘i.i.d.’, each edge appears independently with probability 0.5, and  $K = 10$  is fixed. The mean reward of each arm is i.i.d.  $U(0, 1)$ . In ‘Skewed’,  $K = G + 1$ , and a group  $g \in \{1, \dots, G - 1\}$  has access to arms  $\{g, G\}$ , while the last group  $g = G$  has access to all arms. The rewards of arms  $1, \dots, G - 1$  are equal, and  $\mu(1) < \mu(G) < \mu(G + 1)$  are generated randomly by sorting three i.i.d.  $U(0, 1)$  random variables.

Table 1 shows that the PoF is very small in the ‘i.i.d.’ setting, and contrary to Theorem 4.2 the PoF actually decreases as  $G$  gets large. This suggests an interesting conjecture for future research: the PoF may actually grow negligible in large random bandit instances. The ‘Skewed’ structure is motivated by our PoF analysis where we see that the PoF increase – albeit slowly – with  $G$ .

Table 1: The median and 95th percentile of the PoF for synthetic instances of the grouped  $K$ -armed bandit over 500 runs of each method.

| $G$             | i.i.d. |       |       |       | Skewed |       |       |       |
|-----------------|--------|-------|-------|-------|--------|-------|-------|-------|
|                 | 3      | 5     | 10    | 50    | 3      | 5     | 10    | 50    |
| Median          | 0.073  | 0.054 | 0.040 | 0.015 | 0.327  | 0.407 | 0.454 | 0.521 |
| 95th percentile | 0.289  | 0.177 | 0.142 | 0.063 | 0.632  | 0.764 | 0.845 | 0.924 |

Table 2: Asymptotic disagreement point, regret, and utility gains for each group under the regret optimal and fair policies, where groups are either based on race or age. The numbers are derived from the optimal solution to  $(L(\theta))$  and  $(L^{\text{fair}}(\theta))$  for the regret optimal and fair policies respectively, for the grouped linear contextual bandit instance based on the warfarin dataset. As regret scales logarithmically as  $T \rightarrow \infty$ , these numbers represent the coefficient of  $\log T$  term.

|              |                    | Race |      |      |       | Age   |      |       |
|--------------|--------------------|------|------|------|-------|-------|------|-------|
|              |                    | A    | B    | C    | Total | A     | B    | Total |
| Regret       | Disagreement point | 25.6 | 74.8 | 78.6 | 179.1 | 164.7 | 78.0 | 242.8 |
|              | Regret optimal     | 1.9  | 5.6  | 71.1 | 78.6  | 151.6 | 23.2 | 174.8 |
|              | Fair               | 0.0  | 25.4 | 54.0 | 79.4  | 149.3 | 29.3 | 178.7 |
| Utility Gain | Regret optimal     | 23.7 | 69.2 | 7.6  | 100.4 | 13.1  | 54.9 | 68.0  |
|              | Fair               | 25.6 | 49.4 | 24.6 | 99.6  | 15.4  | 48.7 | 64.1  |

**Warfarin Dosing Case Study:** Warfarin is a common blood thinner whose optimal dose varies widely across patients. We use a publicly available dataset [30] to evaluate the effect of using a proportionally fair policy on learning the optimal personalized dose of warfarin. A detailed description of the experimental setup is deferred to Appendix A.3. The dataset contains covariates and the optimal dose of warfarin for 5700 patients. Both the age and race of patients are available and we use these to define groups. We use a linear contextual bandit setup with five features and an intercept; three actions (dose levels) are available to any arriving patient.

The results in Table 2 shows that for both groups based on race and age, the fair solution effectively ‘balances out’ the utility gains across groups with a small increase in regret. For race, we see that the disagreement point for groups B and C are very similar, but the regret optimal solution ends up benefitting B substantially more than C. The fair solution is able to ‘even out’ the utility gain between C to B for a small increase in regret. For age, the impact of fairness is smaller than with race which is potentially since there is less opportunity to learn across age groups than across race.

## References

- [1] Edward S Kim, Roy S Herbst, Ignacio I Wistuba, J Jack Lee, George R Blumenschein, Anne Tsao, David J Stewart, Marshall E Hicks, Jeremy Erasmus, Sanjay Gupta, et al. The battle trial: personalizing therapy for lung cancer. *Cancer discovery*, 1(1):44–53, 2011.
- [2] Donald A Berry. Adaptive clinical trials in oncology. *Nature reviews Clinical oncology*, 9(4):199, 2012.
- [3] Donald A Berry. The brave new world of clinical cancer research: adaptive biomarker-driven trials integrating clinical practice with clinical research. *Molecular oncology*, 9(5):951–959, 2015.
- [4] Hope S Rugo, Olufunmilayo I Olopade, Angela DeMichele, Christina Yau, Laura J van’t Veer, Meredith B Buxton, Michael Hogarth, Nola M Hylton, Melissa Paoloni, Jane Perlmutter, et al. Adaptive randomization of veliparib–carboplatin treatment in breast cancer. *New England Journal of Medicine*, 375(1):23–34, 2016.
- [5] Richard M Bergenstal, Mary Johnson, Rebecca Passi, Anuj Bhargava, Natalie Young, Davida F Kruger, Eran Bashan, Stanley G Bisgaier, Deanna J Marriott Isaman, and Israel Hodish. Automated insulin dosing guidance to optimise insulin management in patients with type 2 diabetes: a multicentre, randomised controlled trial. *The Lancet*, 393(10176):1138–1148, 2019.
- [6] Revital Nimri, Tadej Battelino, Lori M Laffel, Robert H Slover, Desmond Schatz, Stuart A Weinzimer, Klemen Dovc, Thomas Danne, and Moshe Phillip. Insulin dose optimization using an automated artificial intelligence-based decision support system in youths with type 1 diabetes. *Nature medicine*, 26(9):1380–1384, 2020.
- [7] Hamsa Bastani and Mohsen Bayati. Online decision making with high-dimensional covariates. *Operations Research*, 68(1):276–294, 2020.
- [8] Thore Graepel, Joaquin Quinonero Candela, Thomas Borchert, and Ralf Herbrich. Web-scale bayesian click-through rate prediction for sponsored search advertising in microsoft’s bing search engine. In *ICML*, 2010.
- [9] Deepak Agarwal, Bo Long, Jonathan Traupman, Doris Xin, and Liang Zhang. Laser: A scalable response prediction platform for online advertising. In *Proceedings of the 7th ACM international conference on Web search and data mining*, pages 173–182, 2014.
- [10] Tze Leung Lai and Herbert Robbins. Asymptotically efficient adaptive allocation rules. *Advances in applied mathematics*, 6(1):4–22, 1985.
- [11] Christopher Jung, Sampath Kannan, and Neil Lutz. Quantifying the burden of exploration and the unfairness of free riding. In *Proceedings of the Fourteenth Annual ACM-SIAM Symposium on Discrete Algorithms*, pages 1892–1904. SIAM, 2020.
- [12] Manish Raghavan, Aleksandrs Slivkins, Jennifer Vaughan Wortman, and Zhiwei Steven Wu. The externalities of exploration and how data diversity helps exploitation. In *Conference on Learning Theory*, pages 1724–1738. PMLR, 2018.
- [13] Robert Kleinberg, Alexandru Niculescu-Mizil, and Yogeshwer Sharma. Regret bounds for sleeping experts and bandits. *Machine learning*, 80(2):245–272, 2010.
- [14] Matthew Joseph, Michael Kearns, Jamie Morgenstern, and Aaron Roth. Fairness in learning: Classic and contextual bandits. *arXiv preprint arXiv:1605.07139*, 2016.
- [15] Yang Liu, Goran Radanovic, Christos Dimitrakakis, Debmalya Mandal, and David C Parkes. Calibrated fairness in bandits. *arXiv preprint arXiv:1707.01875*, 2017.
- [16] Stephen Gillen, Christopher Jung, Michael Kearns, and Aaron Roth. Online learning with an unknown fairness metric. *arXiv preprint arXiv:1802.06936*, 2018.
- [17] Vishakha Patil, Ganesh Ghalme, Vineet Nair, and Y Narahari. Achieving fairness in the stochastic multi-armed bandit problem. In *Proceedings of the AAAI Conference on Artificial Intelligence*, volume 34, pages 5379–5386, 2020.

- [18] Todd L Graves and Tze Leung Lai. Asymptotically efficient adaptive choice of control laws in controlled markov chains. *SIAM journal on control and optimization*, 35(3):715–743, 1997.
- [19] Tor Lattimore and Csaba Szepesvari. The end of optimism? an asymptotic analysis of finite-armed linear bandits. In *Artificial Intelligence and Statistics*, pages 728–737. PMLR, 2017.
- [20] Richard Combes, Stefan Magureanu, and Alexandre Proutiere. Minimal exploration in structured stochastic bandits. *arXiv preprint arXiv:1711.00400*, 2017.
- [21] Bart Van Parys and Negin Golrezaei. Optimal learning for structured bandits. *Available at SSRN 3651397*, 2020.
- [22] Botao Hao, Tor Lattimore, and Csaba Szepesvari. Adaptive exploration in linear contextual bandit. In *International Conference on Artificial Intelligence and Statistics*, pages 3536–3545. PMLR, 2020.
- [23] H Peyton Young. *Equity: in theory and practice*. Princeton University Press, 1995.
- [24] Amartya Sen and James Eric Foster. *On Economic Inequality*. Oxford university press, 1997.
- [25] John F Nash. The bargaining problem. *Econometrica: Journal of the econometric society*, pages 155–162, 1950.
- [26] Andreu Mas-Colell, Michael Dennis Whinston, Jerry R Green, et al. *Microeconomic theory*, volume 1. Oxford university press New York, 1995.
- [27] Mamoru Kaneko and Kenjiro Nakamura. The nash social welfare function. *Econometrica: Journal of the Econometric Society*, pages 423–435, 1979.
- [28] Aurélien Garivier and Olivier Cappé. The kl-ucb algorithm for bounded stochastic bandits and beyond. In *Proceedings of the 24th annual conference on learning theory*, pages 359–376, 2011.
- [29] Dimitris Bertsimas, Vivek F Farias, and Nikolaos Trichakis. The price of fairness. *Operations research*, 59(1):17–31, 2011.
- [30] Michelle Whirl-Carrillo, Ellen M McDonagh, JM Hebert, Li Gong, K Sangkuhl, CF Thorn, Russ B Altman, and Teri E Klein. Pharmacogenomics knowledge for personalized medicine. *Clinical Pharmacology & Therapeutics*, 92(4):414–417, 2012.
- [31] International Warfarin Pharmacogenetics Consortium. Estimation of the warfarin dose with clinical and pharmacogenetic data. *New England Journal of Medicine*, 360(8):753–764, 2009.
- [32] Fumihiko Takeuchi, Ralph McGinnis, Stephane Bourgeois, Chris Barnes, Niclas Eriksson, Nicole Soranzo, Pamela Whittaker, Venkatesh Ranganath, Vasudev Kumanduri, William McLaren, et al. A genome-wide association study confirms *vkorc1*, *cyp2c9*, and *cyp4f2* as principal genetic determinants of warfarin dose. *PLoS Genet*, 5(3):e1000433, 2009.

## Checklist

1. For all authors...
  - (a) Do the main claims made in the abstract and introduction accurately reflect the paper’s contributions and scope? [\[Yes\]](#)
  - (b) Did you describe the limitations of your work? [\[Yes\]](#)
  - (c) Did you discuss any potential negative societal impacts of your work? [\[Yes\]](#) Total social welfare can decrease, and the extent of this is evaluated in Section 4.2 and is one focus of the experiments in Section 6.
  - (d) Have you read the ethics review guidelines and ensured that your paper conforms to them? [\[Yes\]](#)
2. If you are including theoretical results...
  - (a) Did you state the full set of assumptions of all theoretical results? [\[Yes\]](#)

- 440 (b) Did you include complete proofs of all theoretical results? [\[Yes\]](#) All proofs are in  
 441 supplemental material.
- 442 3. If you ran experiments...
- 443 (a) Did you include the code, data, and instructions needed to reproduce the main experi-  
 444 mental results (either in the supplemental material or as a URL)? [\[Yes\]](#) Supplemental  
 445 material.
- 446 (b) Did you specify all the training details (e.g., data splits, hyperparameters, how they  
 447 were chosen)? [\[Yes\]](#)
- 448 (c) Did you report error bars (e.g., with respect to the random seed after running experi-  
 449 ments multiple times)? [\[Yes\]](#) We report both median and 95 percentile.
- 450 (d) Did you include the total amount of compute and the type of resources used (e.g., type  
 451 of GPUs, internal cluster, or cloud provider)? [\[Yes\]](#)
- 452 4. If you are using existing assets (e.g., code, data, models) or curating/releasing new assets...
- 453 (a) If your work uses existing assets, did you cite the creators? [\[Yes\]](#) [31]
- 454 (b) Did you mention the license of the assets? [\[Yes\]](#) In Appendix A.3.
- 455 (c) Did you include any new assets either in the supplemental material or as a URL? [\[Yes\]](#)  
 456 Code for experiments in supplemental material.
- 457 (d) Did you discuss whether and how consent was obtained from people whose data you're  
 458 using/curating? [\[Yes\]](#) In Appendix A.3.
- 459 (e) Did you discuss whether the data you are using/curating contains personally identifiable  
 460 information or offensive content? [\[Yes\]](#) In Appendix A.3.
- 461 5. If you used crowdsourcing or conducted research with human subjects...
- 462 (a) Did you include the full text of instructions given to participants and screenshots, if  
 463 applicable? [\[N/A\]](#)
- 464 (b) Did you describe any potential participant risks, with links to Institutional Review  
 465 Board (IRB) approvals, if applicable? [\[N/A\]](#)
- 466 (c) Did you include the estimated hourly wage paid to participants and the total amount  
 467 spent on participant compensation? [\[N/A\]](#)

## A Deferred Descriptions

### A.1 Negative Externality Example from [12]

[12] provide an example of an instance where there exists a sub-population that is better off when UCB is run on that sub-population alone, compared to running UCB on the entire population. The example they provide depends on the total time horizon  $T$ . We claim that this does not occur when you fix an instance and consider asymptotic log-scaled regret,  $\lim_{T \rightarrow \infty} \frac{R_T}{\log T}$ .

Fix any time  $T_0$ , and consider the two-armed instance according to  $T = T_0$  from Definition 1 of [12]. The population consists of three buckets that depend on their starting location: A, B, and C. The sub-population consisting of B and C is dubbed the “minority”, while A is the “majority”. Note that only B has access to both arms and hence it is the only bucket that can ever incur regret. Group B pulls the arm that has a higher UCB, defined as  $\hat{\theta}_t(a) + \sqrt{\frac{\alpha \log T_0}{N_t(a)}}$  for some tuning parameter  $\alpha > 0$ .

We first summarize informally how the negative externality arises. Because arms 1 and 2 are so close together, even after  $O(T_0)$  time steps, which arm has a higher UCB is not dominated by the difference between their empirical means, but it is dominated the second term of the UCB:  $\sqrt{\frac{\alpha \log T_0}{N_t(a)}}$ , which is just a function of the number of pulls  $N_t(a)$ . That is, group B essentially ends up pulling the arm that has fewer pulls. Therefore, when only the minority exists, since C only pulls arm 2, arm 1 ends up having a higher UCB, and hence B ends up always pulling arm 1. However, if the majority group exists, arm 1 always has more pulls than arm 2 since there are more people from A than C. Then, B ends up essentially always pulling arm 2. If arm 2 is the arm that has a lower true reward than arm 1, then regret is higher when the majority group exists — therefore, the existence of the majority can have a “negative externality” on the minority.

However, if we fix this instance and let  $T \rightarrow \infty$ , then no matter which arms is better, from Theorem C.1, the total log-scaled regret is 0 from running KL-UCB. Moreover, when the majority does not exist, then the minority incurs non-zero log-scaled regret when  $\theta_1 < \theta_2$ . Therefore, the presence of the majority can only help the minority. Now, as explained in [12], it is true that the presence of the majority can negatively affect the minority in the early time steps (i.e.  $t < T_0$ ). In the asymptotic regime, such a negative externality corresponds to adding  $o(\log T)$  regret, which is deemed insignificant in our setting.

### A.2 Optimal Allocation Matching (OAM) Policy

We describe the OAM algorithm from [22].

**Preliminaries:** Let  $G_t = \sum_{s=1}^{t-1} A_s A_s^\top$  and let  $\hat{\theta}_t = G_t^{-1} \sum_{s=1}^{t-1} A_s Y_s$  be the least squares estimate of  $\theta$  at time  $t$ . Let  $\hat{\Delta}_t^m(a) = \max_{a' \in \mathcal{A}(m)} \langle a' - a, \hat{\theta}_t \rangle$  be the corresponding estimate of  $\Delta^m(a)$ . Let  $\hat{\Delta}_t^{\min} = \min_{m \in [M]} \min_{a \in \mathcal{A}(m), \hat{\Delta}_t(m, a) > 0} \hat{\Delta}_t(m, a)$  be the smallest nonzero instantaneous regret. Let

$$f_{T, \delta} = 2 \left( 1 + \frac{1}{\log T} \right) \log \left( \frac{1}{\delta} \right) + cd \log(d \log T),$$

where  $c$  is an absolute constant. Let  $f_T = f_{T, 1/T}$ .

Define the following optimization problem that takes  $\tilde{\Delta}(m, a)$  as input:

$$(K) \quad \begin{aligned} \min \quad & \sum_{m \in \mathcal{M}} \sum_{a \in \mathcal{A}(m)} Q(m, a) \tilde{\Delta}(m, a) \\ \text{s.t.} \quad & \|a\|_{H_T^{-1}}^2 \leq \frac{\tilde{\Delta}(m, a)^2}{f_T} \quad \forall m \in \mathcal{M}, a \in \mathcal{A}(m) \\ & Q(m, a) \geq 0 \quad \forall m \in \mathcal{M}, a \in \mathcal{A}, \end{aligned}$$

where  $H_T = \sum_{m \in \mathcal{M}} \sum_{a \in \mathcal{A}(m)} Q(m, a) a a^\top$  is invertible. Let  $(\hat{Q}_t(m, a))_{m \in \mathcal{M}, a \in \mathcal{A}}$  be the solution to (K) using  $\tilde{\Delta} = \hat{\Delta}_t$ .

506 **Algorithm:** We are now ready to state the algorithm. At each time step  $t$ , observe context  $m_t$  and  
 507 do the following. First, check whether

$$(10) \quad \|a\|_{G_t^{-1}}^2 \leq \frac{\hat{\Delta}_t(m, a)^2}{f_T} \quad \forall a \in \mathcal{A}(m_t).$$

508 If (10) is satisfied, we exploit; otherwise, we explore.

509 **Exploit:** Pull the greedy arm:  $\operatorname{argmax}_{a \in \mathcal{A}(m_t)} \langle a, \hat{\theta}_t \rangle$ .

510 **Explore:** Let  $s(t)$  be the total number of exploration rounds so far. Solve the empirical optimization  
 511 problem  $(K)$  to get solution  $\hat{Q}_t(m, a)$ .

- 512 1. Check whether  $N_t^{m_t}(a) \geq \min(\hat{Q}_t(m_t, a), f_T/(\hat{\Delta}_t^{\min})^2)$  holds for all available arms  $a \in$   
 513  $\mathcal{A}(m_t)$ . If so, pull the UCB arm  $A_t = \operatorname{argmax}_{a \in \mathcal{A}(m_t)} \langle a, \hat{\theta}_t \rangle + \sqrt{f_T, 1/s(t)^2} \|a\|_{G_t^{-1}}$ .
- 514 2. Check whether there exists an available arm  $a \in \mathcal{A}(m_t)$  such that  $N_t(a) \leq \varepsilon_t s(t)$ , where  
 515  $\varepsilon_t = 1/\log \log t$ . If there is, then pull  $A_t = \operatorname{argmin}_{a \in \mathcal{A}(m_t)} N_t(a)$ .
- 516 3. If the above two criteria are not true, then pull  $A_t =$   
 517  $\operatorname{argmin}_{a \in \mathcal{A}(m_t)} \frac{N_t(a)}{\min(\hat{Q}_t(m_t, a), f_T/(\hat{\Delta}_t^{\min})^2)}$ .

### 518 A.3 Warfarin Experiment Details

519 We use a publicly available dataset for warfarin dosing that was collected by the Pharmacogenomics  
 520 Knowledge Base (PharmGKB [30]), which is under a Creative Commons license<sup>1</sup>. The dataset  
 521 contains 5700 patients who were treated with warfarin from 21 research groups over 9 countries.  
 522 Consent for all patients was obtained previously from each center, and no personally identifiable  
 523 information was used. The dataset contains the optimal dose of warfarin for each patient, which  
 524 was found by doctors through trial and error. It also includes many other covariates for each patient  
 525 including demographics, clinical features, and genetic information.

526 **Groups:** We group the patients either by race or age. There were three distinct races in the dataset,  
 527 which we label as A, B, and C. For age, we split the patients into two age groups, where the threshold  
 528 age was 70.

529 **Contexts:** The OAM and PF-OAM policies assume a finite number of possible feature vectors, and  
 530 the optimization problem  $(L(\theta))$  scales with this number. Therefore, for tractability, we only use  
 531 five features for the contexts of the patients, where we discretize each feature into two bins. We use  
 532 the five features that are most correlated with the optimal warfarin dosage, and we use the empirical  
 533 median of each feature to discretize them. The five features that we use are: age, weight, whether  
 534 the patient was taking another drug (amiodarone), and two binary features capturing whether the  
 535 patient has a particular genetic variant of genes Cyp2C9 and VKORC1, two genes that are known  
 536 to affect warfarin dosage [32]. Out of  $2^5 = 32$  different possible feature vectors, there were 21 that  
 537 were present in the data.

538 **Rewards:** We bin the optimal dosage levels into three arms as was done in [7]: Low (under 3  
 539 mg/day), Medium (3-7 mg/day), and High (over 7 mg/day). To ensure that the model is correctly  
 540 specified, for each arm, we train a linear regression model using the entire dataset from the five  
 541 contexts to the binary reward on whether the optimal dosage for that patient belongs in that bin. Let  
 542  $\theta_a \in \mathbb{R}^6$  be the learned linear regression parameter for each arm ( $d = 6$  to include the intercept).<sup>2</sup>  
 543 To model this as grouped linear contextual bandits as described in Section 5, we let  $d = 18$  and let  
 544  $\theta = (\theta_1, \theta_2, \theta_3) \in \mathbb{R}^d$ . When a patient with covariates  $X \in \mathbb{R}^6$  arrives, the actions available are  
 545  $\{(X, \mathbf{0}, \mathbf{0}), (\mathbf{0}, X, \mathbf{0}), (\mathbf{0}, \mathbf{0}, X)\}$ , and their expected reward from arm  $a$  is  $\langle X, \theta_a \rangle$  for  $a \in \{1, 2, 3\}$ .

546 **Algorithms:** We assume a patient is drawn i.i.d. from the dataset at each time step, and we compute  
 547 the asymptotic group regret of the OAM policy ('Regret optimal') and the fair extension ('Fair') as  
 548 described in Section 5:

<sup>1</sup><https://creativecommons.org/licenses/by-sa/4.0/>

<sup>2</sup>The linear regression step is done solely to remove model misspecification. The purpose of this study is not to show that the linear contextual bandit is a good fit for this dataset — this was already demonstrated in [7]. rather, the purpose is to demonstrate how incorporating fairness changes the outcome from a policy that does not take fairness into account on a bandit instance that approximates a real-world setting. rather, the purpose is to

- *Regret optimal:* Using the true values  $\theta$ , we solve  $(L(\theta))$  and obtain solution  $(Q(m, a))_{m \in [M], a \in \mathcal{A}}$ . Then, the total (log-scaled) regret incurred by context  $m$  is  $\sum_{a \in \mathcal{A}} \Delta(m, a) Q(m, a)$ . Since we assume the group arrivals are i.i.d., for each context, we allocate the regret to groups in proportion to the group's frequency. That is, for each  $m$ , let  $(w^g(m))_{g \in \mathcal{G}}$ ,  $\sum_{g \in \mathcal{G}} w^g(m) = 1$  be the empirical distribution of groups among patients with context  $m$ . Then, the total regret assigned to group  $g$  is  $\sum_{m \in [M]} w^g(m) \sum_{a \in \mathcal{A}} \Delta(m, a) Q(m, a)$ .
- *Fair:* Using the true values  $\Delta$ , we solve  $(L^{\text{fair}}(\theta))$  and obtain solution  $(Q^g(m, a))_{g \in \mathcal{G}, m \in [M], a \in \mathcal{A}}$ . The total regret assigned to group  $g$  is  $\sum_{m \in [M]} \sum_{a \in \mathcal{A}} \Delta(m, a) Q^g(m, a)$ .

All experiments were run on a Macbook Pro with a 2.5 GHz Intel Core i7 processor.

## B Proof Preliminaries

### B.1 Notation

For all of the subsequent proofs, we assume that an instance  $\mathcal{I}$  is *fixed*. We often use big-O notation, which is with respect to  $T \rightarrow \infty$ , unless otherwise specified. The big-O hides constants that may depend on any other parameter other than  $T$ , including the instance  $\mathcal{I}$ . In general, when we introduce a *constant*, it may depend on any other parameters other than  $T$ . We are usually not concerned with the values of the constants as we are concerned with asymptotic results (though we do concern ourselves with constants in front of the leading term, usually  $\log T$ ). We sometimes re-use letters like  $c$  for constants but they do not refer to the same value.

The UCB of an arm is defined as:

$$(11) \quad \text{UCB}_t(a) = \max\{q : N_t(a) \text{KL}(\hat{\theta}_t(a), q) \leq \log t + 3 \log \log t\}.$$

Let  $\text{Pull}_t(a)$  be the indicator for arm  $a$  being pulled at time  $t$ , and let  $\text{Pull}_t^g(a)$  be the indicator for when arm  $a$  is pulled by group  $g$ . We define the class of log-consistent policies:

**Definition B.1.** A policy  $\pi$  for the grouped bandit problem is *log-consistent* if for any instance  $(\theta, G, (p_g)_{g \in G}, (\mathcal{A}_g)_{g \in G})$ , for any group  $g$ ,

$$(12) \quad \mathbb{E} \left[ \sum_{a \in \mathcal{A}_{\text{sub}}(g)} N_T^g(a) \right] = O(\log T).$$

That is, the expected number of times that group  $g$  pulled a suboptimal arm by time  $t$  is logarithmic in the number of arrivals of  $g$ .

### B.2 Commonly Used Lemmas

We state a few lemmas that are used several times for both Theorem C.1 and Theorem 4.1. These lemmas do not depend on the policy that is used. The first result shows that the number of times that an arm's UCB is smaller than its true mean is small.

**Lemma B.2.** Let  $\Lambda_t = \{\text{UCB}_t(a) \geq \theta(a) \forall a \in \mathcal{A}\}$  be the event that UCB for every arm is valid at time  $t$ .

$$\sum_{t=1}^T \Pr(\bar{\Lambda}_t) = O(\log \log T).$$

*Proof.* For a fix arm  $a$ ,  $\sum_{t=1}^T \Pr(\text{UCB}_t(a) < \theta(a)) = O(\log \log T)$  follows from Theorem 10 of [28], plugging in  $\delta = \log t + 3 \log \log t$  as is done in the proof of Theorem 2 of [28]. The result follows from a union bound over all actions  $a \in \mathcal{A}$ .  $\square$

The second lemma states a relationship between the radius of the UCB of an arm and the number of pulls of the arm.

**Lemma B.3.** Let  $0 < \alpha < \beta < 1$ . There exists a constant  $c > 0$  such that if  $\hat{\theta}_t(a) \leq \alpha$  and  $\text{UCB}_t(a) \geq \beta$ , then  $N_t(a) < c \log t$ .

589 *Proof.* Suppose  $\hat{\theta}_t(a) \leq \alpha$  and  $\text{UCB}_t(a) \geq \beta$ . Then,  $\text{KL}(\hat{\theta}_t(a), \text{UCB}_t(a)) \geq \text{KL}(\alpha, \beta)$ . Let  
 590  $c = \frac{4}{\text{KL}(\alpha, \beta)}$ . By definition of the UCB (11),  $N_t(a) \leq \frac{\log t + 3 \log \log t}{\text{KL}(\hat{\theta}_t(a), \text{UCB}_t(a))} \leq c \log t$ .  $\square$

591 This result essentially states that if the radius of the UCB of an arm is larger than a constant, then the  
 592 number of pulls of the arm is at most  $O(\log t)$ ; this result follows simply from the definition of the  
 593 UCB (11). The next result states that if an arm  $a$  is pulled, then its empirical mean will be close to its  
 594 true mean.

595 **Lemma B.4.** For any group  $g$  and arm  $a \in \mathcal{A}^g$ , if  $L < \theta(a) < U$ ,

$$\sum_{t=1}^T \Pr(\text{Pull}_t(a), \hat{\theta}_t(a) \notin [L, U]) = O(1).$$

596 where big- $O$  hides constants that may depend on the instance and  $L, U$ .

597 *Proof.* Let  $\hat{\theta}^n(a)$  be the empirical mean after  $n$  pulls of arm  $a$ . Let  $E_{t,n}$  be the event that the number  
 598 of times arm 1 has been pulled before time  $t$  is exactly  $n$ .

$$\begin{aligned} & \sum_{t=1}^T \Pr(\text{Pull}_t(a), \hat{\theta}_t(a) \notin [L, U]) \\ &= \sum_{t=1}^T \sum_{n=1}^T \Pr(\text{Pull}_t(a), \hat{\theta}^n(a) \notin [L, U], E_{t,n}) \\ &= \sum_{n=1}^T \sum_{t=1}^T \Pr(\hat{\theta}^n(a) \notin [L, U] \mid \text{Pull}_t(a), E_{t,n}) \Pr(\text{Pull}_t(a), E_{t,n}) \end{aligned}$$

599 If  $F_{t,n} = \{\text{Pull}_t(a), E_{t,n}\}$ , then for any  $n$ , the events  $F_{1,n}, \dots, F_{T,n}$  are disjoint. Then, by the law  
 600 of total probability,  $\Pr(\hat{\theta}^n(a) \notin [L, U]) \geq \sum_{t=1}^T \Pr(\hat{\theta}^n(a) \notin [L, U] \mid F_{t,n}) \Pr(F_{t,n})$ . Therefore,

$$\sum_{t=1}^T \Pr(\text{Pull}_t(a), \hat{\theta}_t(a) \notin [L, U]) \leq \sum_{n=1}^T \Pr(\hat{\theta}^n(a) \notin [L, U]) \leq \sum_{n=1}^T \exp(-\alpha n).$$

601 for some  $\alpha > 0$  since the rewards of arm  $a$  are Bernoulli. Therefore,  $\sum_{t=1}^T \Pr(\text{Pull}_t(a), \hat{\theta}_t(a) \notin$   
 602  $[L, U]) = O(1)$ .  $\square$

## 603 C Proof that KL-UCB is Regret Optimal

604 In this section, we prove that the KL-UCB policy is regret-optimal. At each time step,  $\pi^{\text{KL-UCB}}$   
 605 chooses the arm with the highest UCB, defined as (11), out of all arms available.

606 **Theorem C.1.** For all instances  $\mathcal{I}$  of the grouped  $K$ -armed bandit,

$$(13) \quad \liminf_{T \rightarrow \infty} \frac{R_T(\pi^{\text{KL-UCB}}, \mathcal{I})}{\log T} \leq \sum_{a \in \mathcal{A}_{\text{sub}}} \Delta^{\Gamma(a)}(a) J(a).$$

607 The first step of the proof is to show that the number of pulls of a suboptimal arm is optimal:

608 **Proposition C.2.** Let  $a \in \mathcal{A}_{\text{sub}}$  be a suboptimal arm. KL-UCB satisfies

$$\limsup_{T \rightarrow \infty} \frac{\mathbb{E}[N_T(a)]}{\log T} \leq J(a).$$

609 This result can be shown using the existing analysis of KL-UCB from [28]. The next step is to  
 610 analyze how these pulls are distributed across groups. In particular, we need to show that a group  
 611 never pulls a suboptimal arm  $a$  if  $g \notin \Gamma(a)$ . This is the result of the next theorem:

612 **Proposition C.3.** Let  $a \in \mathcal{A}$ . Let  $g \in G_a$ ,  $g \notin \Gamma(a)$  be a group that has access to the arm but is not  
 613 the group that has the smallest optimal out of  $G_a$ . Then, KL-UCB satisfies

$$\mathbb{E}[N_T^g(a)] = O(\log \log T),$$

614 where the big- $O$  hides constants that depend on the instance.



615 This result implies that for any arm  $a$ , the regret incurred by group  $g \notin \Gamma(a)$  pulling the arm  
 616 is  $o(\log T)$ , and is equal to 0 when scaled by  $\log T$ . Theorem C.1 then follows from combining  
 617 Proposition C.2 and Proposition C.3.

618 In this section, we prove Proposition C.3. Let  $a \in \mathcal{A}$  and let  $A \in \Gamma(a)$  be a group that has access to  
 619 that arm with the smallest OPT. Let group  $B \notin \Gamma(a)$  be another group that has access to arm  $a$ . Let  
 620  $\theta^A, \theta^B$  be the optimal arms for group A and B respectively. We use  $\theta^A, \theta^B$  to refer to both the arm  
 621 and the arm means. Our goal is to show  $\mathbb{E}[N_T^B(a)] = O(\log \log T)$ .

$$\begin{aligned} \mathbb{E}[N_T^B(a)] &= \sum_{t=1}^T \Pr(\text{Pull}_t^B(a)) \\ &= \sum_{t=1}^T \Pr(\text{Pull}_t^B(a), \text{UCB}_t(\theta^B) \geq \theta^B) + \sum_{t=1}^T \Pr(\text{Pull}_t^B(a), \text{UCB}_t(\theta^B) < \theta^B). \end{aligned}$$

622 The second sum can be bounded by Lemma B.2, since  $\sum_{t=1}^T \Pr(\text{Pull}_t^B(a), \text{UCB}_t(\theta^B) < \theta^B) \leq$   
 623  $\sum_{t=1}^T \Pr(\bar{\Lambda}_t) = O(\log \log T)$ . Therefore, our goal is to show

$$(14) \quad \sum_{t=1}^T \Pr(\text{Pull}_t^B(a), \text{UCB}_t(\theta^B) \geq \theta^B) = O(\log \log T).$$

624 We state a slightly more general result that implies (14).

625 **Lemma C.4.** *Suppose we run any log-consistent policy  $\pi$ . Let  $r > 0$  be fixed. For any  $a \in \mathcal{A}$ ,*

$$\sum_{t=1}^T \Pr(\text{Pull}_t(a), \text{UCB}_t(a) \geq \text{OPT}(\Gamma(a)) + r) = O(\log \log T),$$

626 *where the constant in the big-O may depend on the instance and  $r$ .*

627 The rest of this section proves Lemma C.4.

### 628 C.1 Probabilistic Lower Bound of $N_t(a)$ for Grouped Bandit

629 One of the main tools used in the proof of Lemma C.4 is a high probability lower bound on the  
 630 number of pulls of a suboptimal arm. Let  $W_t(g)$  be the number of arrivals of group  $g$  by time  $t$ .  
 631 Let  $R_t^g = \{W_t(g) \geq \frac{p_g t}{2}\}$  be the event that the number of arrivals of group  $g$  is at least half of the  
 632 expected value. We condition on the event  $R_t^g$  to ensure that a group has arrived a sufficient number  
 633 of times.

634 **Proposition C.5.** *Let  $g$  be a group, and let  $a \in \mathcal{A}_{\text{sub}}^g$  be a suboptimal arm for group  $g$ . Fix  $\varepsilon \in (0, 1)$ .  
 635 Suppose we run a log-consistent policy as defined in Definition B.1. Then,*

$$\Pr\left(N_t(a) \leq \frac{(1-\varepsilon)\log t}{KL(\theta(a), \text{OPT}(g))} \mid R_t^g\right) = O\left(\frac{1}{\log t}\right),$$

636 *where the big-O notation is with respect to  $t \rightarrow \infty$ .*

637 The proof of this result can be found in Appendix D.3. For an arm  $a \notin \mathcal{A}_{\text{sub}}$ , we have the following  
 638 stronger result:

639 **Proposition C.6.** *Let  $a$  be an arm that is optimal for some group  $g$ . Suppose we run a log-consistent  
 640 policy. Then, for any  $b > 0$ ,*

$$\Pr(N_t(a) \leq b \log t \mid R_t^g) = O\left(\frac{1}{\log t}\right),$$

641 *where the big-O notation is with respect to  $t \rightarrow \infty$  and hide constants that depend on both  $b$  and the  
 642 instance.*

## 643 C.2 Proof of Lemma C.4

644 **Outline:** Let  $A \in \Gamma(a)$  be a group that has the smallest optimal out of all arms with access to  $a$ .  
 645 The main idea of this lemma is that group  $A$  does not “allow” the UCB of arm  $a$  to grow as large  
 646 as  $\text{OPT}(A) + r$ , as group  $A$  would pull arm  $a$  once the UCB is above  $\text{OPT}(A)$ . Proposition C.5  
 647 implies that  $\text{UCB}_t(a)$  is not larger than  $\text{OPT}(A)$  with high probability. If this occurs at time  $t$ , since  
 648 the radius of the UCB grows slowly (logarithmically), the earliest time that the UCB can grow to  
 649  $\text{OPT}(A) + r$  is  $t^\gamma$ , for some  $\gamma > 1$ . We divide the time steps into epochs, where if epoch  $k$  starts at  
 650 time  $s_k$ , it ends at  $s_k^\gamma$ . This exponential structure gives us  $O(\log \log T)$  epochs in total, and we show  
 651 that the expected number of times that  $\text{UCB}_t(a) > \text{OPT}(A) + r$  during one epoch is  $O(1)$ .

652 **Proof:** We denote by  $\theta_a$  the true mean reward of arm  $a$  and by  $\hat{\theta}_t$  the empirical mean reward of  $a$  at  
 653 the start of time  $t$ . Let  $U = \text{OPT}(\Gamma(a)) + r$ . Let  $A \in \Gamma(a)$ , and let  $\theta^A = \text{OPT}(A)$ . If  $a \notin \mathcal{A}_{\text{sub}}$ ,  
 654 then let  $\theta^A = \text{OPT}(A) + r/2$ . Let  $b > 0$  such that  $\frac{\text{KL}(\theta_a, U)}{\text{KL}(\theta_a, \theta^A)} = 1 + b$ . Define  $\theta_u \in [\theta_a, \theta^A]$  such  
 655 that  $\frac{\text{KL}(\theta_u, U)}{\text{KL}(\theta_u, \theta^A)} = 1 + \frac{b}{2}$ . We have  $\theta_a < \theta_u < \theta^A < U$ . Define  $\gamma \triangleq 1 + \frac{b}{4}$ . Let  $\varepsilon > 0$  such that  
 656  $\frac{1-\varepsilon}{1+\varepsilon} \cdot \frac{\text{KL}(\theta_u, U)}{\text{KL}(\theta_a, \theta^A)} = \gamma$ .

657 By Lemma B.4,  $\sum_{t=1}^T \Pr(\text{Pull}_t(a), \hat{\theta}_t(a) > \theta_u) = O(1)$ . Therefore, we can assume  $\hat{\theta}_t(a) \leq \theta_u$ .  
 658 Denote the event of interest by  $E_t = \{\text{Pull}_t(a), \text{UCB}_t(a) \geq \theta^A + r, \hat{\theta}_t(a) \leq \theta_u\}$ . Our goal is to  
 659 show  $\sum_{t=1}^T \Pr(E_t) = O(\log \log T)$ .

660 Divide the time interval  $T$  into  $K = O(\log \log T)$  epochs. Let epoch  $k$  start at  $s_k \triangleq \lceil 2^{\gamma^k} \rceil$  for  $k \geq 0$ .  
 661 Let  $\mathcal{T}_k = \{s_k, s_k + 1, \dots, s_{k+1} - 1\}$  be the time steps in epoch  $k$ . This epoch structure satisfies the  
 662 following properties:

- 663 1. The total number of epochs is  $O(\log \log T)$ .
- 664 2.  $\frac{\log s_{k+1}}{\log s_k} = \gamma$  for all  $k \geq 0$ .

665 We will treat each epoch separately. Fix an epoch  $k$ . Our goal is to bound  $\mathbb{E}[\sum_{t \in \mathcal{T}_k} \mathbf{1}(E_t)]$ .  
 666 Lemma B.3 implies that there exists a constant  $c > 0$  such that if  $E_t$  occurs, it must be that  
 667  $N_t(a) < c \log t$ . Hence,

$$\sum_{t \in \mathcal{T}_k} \mathbf{1}(E_t) \leq c \log s_{k+1}.$$

668 Define the event  $G_t = \left\{N_t(a) \geq (1 - \varepsilon) \frac{\log t}{\text{KL}(\mu, \theta^A)}\right\}$ . The following claim says that if  $G_{s_k}$  is true,  
 669 then  $E_t$  never happens during that epoch.

670 **Claim C.7.** Suppose  $G_{s_k}$  is true. Let  $t_0$  be such that if  $t \geq t_0$ ,  $\log \log t \leq \varepsilon \log t$ . Then, if  
 671  $s_k \geq t_0$ ,  $\sum_{t=s_k}^{s_{k+1}-1} \mathbf{1}(E_t) = 0$ .

672 This result follows from the fact that the event  $G_{s_k}$  implies that the radius of the UCB is “small” at  
 673 time  $s_k$ , and the epoch is defined so that the radius will not grow large enough that  $E_t$  can occur  
 674 during epoch  $k$ . Therefore, we have the following:

$$\mathbb{E} \left[ \sum_{t \in \mathcal{T}_k} \mathbf{1}(E_t) \right] = \mathbb{E} \left[ \sum_{t \in \mathcal{T}_k} \mathbf{1}(E_t) \middle| \bar{G}_{s_k} \right] \Pr(\bar{G}_{s_k}) \leq c \log s_{k+1} \Pr(\bar{G}_{s_k}).$$

675 We can bound  $\Pr(\bar{G}_{s_k})$  using the probabilistic lower bound of Proposition C.5.

676 **Claim C.8.**  $\Pr(\bar{G}_{s_k}) \leq O\left(\frac{1}{\log s_k}\right)$ .

677 Then, property 2 of the epoch structure implies  $\mathbb{E}[\sum_{t \in \mathcal{T}_k} \mathbf{1}(E_t)] = O(1)$ . Since the number of  
 678 epochs is  $O(\log \log T)$ ,

$$\mathbb{E} \left[ \sum_{t=1}^T \mathbf{1}(E_t) \right] \leq \sum_{k=1}^K \mathbb{E} \left[ \sum_{t \in \mathcal{T}_k} \mathbf{1}(E_t) \right] = O(\log \log T),$$

679 as desired.

### 680 C.3 Proof of Claims

681 *Proof of Claim C.7.* Let  $t = s_k > t_0$  and let  $t' \geq t$  such that  $E_{t'}$  is true. By definition of KL-UCB,

$$N_{t'}(a) \leq \frac{\log t' + 3 \log t'}{\text{KL}(\hat{\theta}_{t'}, \text{UCB}_{t'}(\theta))}.$$

682 Since  $E_{t'}$  implies  $\text{UCB}_{t'}(a) > \theta^B$  and  $\hat{\theta}_{t'} \leq \theta_u$ , we have  $N_{t'}(a) \leq \frac{\log t' + 3 \log t'}{\text{KL}(\theta_u, \theta^B)}$ . Since  $G_{s_k}$  is true,

683  $N_{t'}(a) \geq (1 - \varepsilon) \frac{\log s_k}{\text{KL}(\theta_a, \theta^A)}$ . Therefore, it must be that

$$\begin{aligned} (1 - \varepsilon) \frac{\log s_k}{\text{KL}(\theta_a, \theta^A)} &\leq \frac{\log t' + 3 \log \log t'}{\text{KL}(\theta_u, \theta^B)} \leq \frac{(1 + \varepsilon) \log t'}{\text{KL}(\theta_u, \theta^B)} \\ \Rightarrow \frac{1 - \varepsilon}{1 + \varepsilon} \cdot \frac{\text{KL}(\theta_u, \theta^B)}{\text{KL}(\theta_a, \theta^A)} \log s_k &\leq \log t' \\ \Rightarrow t' &\geq s_k^\gamma. \end{aligned}$$

684 This implies that  $t'$  is not in epoch  $k$ . □

685 *Proof of Claim C.8.* For group  $g = A$ , Proposition C.5 (or Proposition C.6 if  $a \notin \mathcal{A}_{\text{sub}}$ ) states that

$$\Pr(\bar{G}_{s_k} \mid R_{s_k}^g) = O\left(\frac{1}{\log s_k}\right).$$

686 (We show in Appendix D.1 that KL-UCB is log-consistent.)

687 Now we need to bound  $\Pr(\bar{R}_{s_k}^g) = \Pr(M_{s_k}(A) \leq \frac{p_A s_k}{2})$ . Note that  $M_s(A) = \sum_{t=1}^s Z_t^A$ , where

688  $Z_t^A \stackrel{\text{iid}}{\sim} \text{Bern}(p_A)$ . By Hoeffding's inequality,

$$\Pr\left(M_{s_k}(A) \leq \frac{p_A s_k}{2}\right) < \exp\left(-\frac{1}{2} p_A^2 s_k\right).$$

689 Combining, we have

$$\Pr(\bar{G}_k) \leq \Pr(\bar{R}_k) + \Pr(\bar{G}_k \mid R_k) \leq O\left(\frac{1}{\log s_k}\right).$$

690 □

### 691 D Deferred Proofs for Theorem C.1

692 For any  $\varepsilon > 0$ , let

$$K_\varepsilon^g(x) = \left\lceil \frac{1 + \varepsilon}{\text{KL}(\theta_a, \text{OPT}(g))} (\log x + 3 \log \log x) \right\rceil.$$

693 To show both Proposition C.2 and the fact that KL-UCB is log-consistent, we make use of the  
694 following lemma.

695 **Lemma D.1.** Let  $a \in \mathcal{A}$ . Let  $g \in G_a$  be a group in which  $a$  is suboptimal. For any  $\varepsilon > 0$ ,

$$(15) \quad \mathbb{E} \left[ \sum_{t=1}^T \mathbf{1}(\text{Pull}_t^g(a), N_t(a) \geq K_\varepsilon^g(T)) \right] = O(\log \log T).$$

696 *Proof.* Let  $\varepsilon > 0$ . Recall that  $A_g^*$  is the optimal arm for group  $g$ , and  $\text{OPT}(g)$  is the mean reward of  
697  $A_g^*$ .

$$\begin{aligned} &\mathbb{E} \left[ \sum_{t=1}^T \mathbf{1}(\text{Pull}_t^g(a), N_t(a) \geq K_\varepsilon^g(T)) \right] \\ &= \mathbb{E} \left[ \sum_{t=1}^T \mathbf{1}(\text{Pull}_t^g(a), N_t(a) \geq K_\varepsilon^g(T), \text{UCB}_t(A_g^*) \geq \text{OPT}(g)) \right] + \mathbb{E} \left[ \sum_{t=1}^T \mathbf{1}(\text{Pull}_t^g(a), \text{UCB}_t(A_g^*) < \text{OPT}(g)) \right] \end{aligned}$$

698 The second term is  $O(\log \log T)$  from Lemma B.2. We will show that the first term is  $O(1)$ . Let  
699  $\hat{\theta}_s(a)$  be the empirical mean of  $a$  after  $s$  pulls. Consider the event  $\{A_t = a, g_t = g, N_t(a) =$   
700  $s, \text{UCB}_t(A_g^*) \geq \text{OPT}(g)\}$ , where  $s \geq K_n$ . Suppose this is true at time  $t$ . Then, it must be that  
701  $\text{UCB}_t(a) \geq \text{OPT}(g)$ . For this to happen, by definition of KL-UCB, it must be that

$$(16) \quad s \text{KL}(\hat{\theta}_s(a), \text{OPT}(g)) \leq \log t + 3 \log \log t.$$

702 Since  $s \geq K_\varepsilon^g(T)$  and  $t \leq T$ , we must have

$$(17) \quad \text{KL}(\hat{\theta}_s(a), \text{OPT}(g)) \leq \frac{\log T + 3 \log \log T}{K_\varepsilon^g(T)} = \frac{\text{KL}(\theta_a, \text{OPT}(g))}{1 + \varepsilon}.$$

703 Let  $r > \theta_a$  such that  $\text{KL}(r, \text{OPT}(g)) = \frac{\text{KL}(\theta_a, \text{OPT}(g))}{1 + \varepsilon}$ . Then, for (17) to occur, it must be that  
704  $\hat{\theta}_s(a) \geq r$ . Then, we have

$$\begin{aligned} & \mathbb{E} \left[ \sum_{t=1}^T \mathbf{1}(\text{Pull}_t^g(a), N_t(a) \geq K_\varepsilon^g(n), \text{UCB}_t(A_g^*) \geq \text{OPT}(g)) \right] \\ &= \mathbb{E} \left[ \sum_{t=1}^T \sum_{s=K_n}^{\infty} \mathbf{1}(\text{Pull}_t^g(a), N_t(a) = s, \text{UCB}_t(A_g^*) \geq \text{OPT}(g)) \right] \\ &\leq \mathbb{E} \left[ \sum_{t=1}^T \sum_{s=K_n}^{\infty} \mathbf{1}(\text{Pull}_t^g(a), N_t(a) = s, \hat{\theta}_s(a) \geq r) \right] \\ &= \mathbb{E} \left[ \sum_{s=K_n}^{\infty} \mathbf{1}(\hat{\theta}_s(a) \geq r) \sum_{t=1}^T \mathbf{1}(\text{Pull}_t^g(a), N_t(a) = s) \right] \\ &\leq \sum_{s=K_n}^{\infty} \Pr(\hat{\theta}_s(a) \geq r). \end{aligned}$$

705 Since  $r > \mu(a)$ , there exists a constant  $C_3 > 0$  that depends on  $\varepsilon$  and  $r$  such that  $\Pr(\mu_s(a) \geq r) \leq$   
706  $\exp(-sC_3)$ . Therefore,  $\sum_{s=K_n}^{\infty} \Pr(\hat{\theta}_s(a) \geq r) = O(1)$  and we are done.

707 □

## 708 D.1 Proof that KL-UCB is log-consistent

709 This basically follows from Lemma D.1. Let  $\varepsilon = 1/2$ . Fix a group  $g$ , and let  $a$  be a suboptimal arm  
710 for  $g$ .

$$\begin{aligned} \mathbb{E}[N_T^g(a)] &= \mathbb{E} \left[ \sum_{t=1}^T \mathbf{1}(\text{Pull}_t^g(a)) \right] \\ &\leq K_\varepsilon^g(T) + \mathbb{E} \left[ \sum_{t=1}^{t_{g(n)}} \mathbf{1}(\text{Pull}_t^g(a), N_t(a) \geq K_\varepsilon^g(T)) \right] \\ &= K_\varepsilon^g(T) + \log \log(T). \end{aligned}$$

711 We are done since  $K_\varepsilon^g(T) = O(\log T)$ .

## 712 D.2 Proof of Proposition C.2

713 Let  $a \in \mathcal{A}_{\text{sub}}$  be a suboptimal arm. Let  $\varepsilon > 0$ . Let

$$K_T = \max_{g \in G_a} K_\varepsilon^g(T).$$

714 Clearly, the maximum is attained in the group  $g$  with the smallest  $\text{OPT}(g)$ , so.

$$K_T = \left\lceil \frac{1 + \varepsilon}{\text{KL}(\theta_a, \text{OPT}(\Gamma(a)))} (\log T + 3 \log \log T) \right\rceil.$$

$$\begin{aligned}
\mathbb{E}[N_T(a)] &= \mathbb{E} \left[ \sum_{t=1}^T \mathbf{1}(A_t = a) \right] \\
&\leq K_T + \mathbb{E} \left[ \sum_{t=1}^T \mathbf{1}(A_t = a, N_t(a) \geq K_T) \right] \\
&\leq K_T + \sum_{g \in G_a} \mathbb{E} \left[ \sum_{t=1}^T \mathbf{1}(\text{Pull}_t^g(a), N_t(a) \geq K_T) \right] \\
&\leq K_T + \sum_{g \in G_a} O(\log \log T).
\end{aligned}$$

715 where the last inequality follows from Eq. (15) of Lemma D.1. Since this holds for any  $\varepsilon > 0$ , the  
716 desired result holds.

### 717 D.3 Proof of Proposition C.5 and Proposition C.6

718 Let  $g$  be a group, and let  $j$  be a suboptimal arm for group  $g$ ; i.e.  $\theta_j < \text{OPT}(g)$ . Fix  $\varepsilon > 0$ . We  
719 assume that the event  $R_t^g = \{W_t(g) \geq \frac{p_g t}{2}\}$  holds. Fix  $\delta > 0$  such that  $\frac{1-\delta}{1+\delta} = 1 - \varepsilon$ . Let  $a = \delta/2$ .  
720 We construct another instance  $\gamma$  where arm  $j$  is replace with  $\lambda$  so that arm  $j$  is the optimal arm for  $g$   
721 in the same manner as the Lai-Robbins proof. Specifically,  $\lambda > \theta_j$  such that

$$\text{KL}(\theta_j, \lambda) = (1 + \delta) \text{KL}(\theta_j, \text{OPT}(g)).$$

722 Our goal is to bound the probability of event  $\left\{ N_t(j) \leq \frac{(1-\delta) \log t}{\text{KL}(\theta_j, \lambda)} \right\}$ , which we split into two events:

$$\begin{aligned}
C_t &= \left\{ N_t(j) \leq \frac{(1-\delta) \log t}{\text{KL}(\theta_j, \lambda)}, L_{N_t(j)} \leq (1-a) \log t \right\}, \\
E_t &= \left\{ N_t(j) \leq \frac{(1-\delta) \log t}{\text{KL}(\theta_j, \lambda)}, L_{N_t(j)} > (1-a) \log t \right\},
\end{aligned}$$

723 where  $L_m = \sum_{i=1}^m \log \left( \frac{f(Y_i; \theta_j)}{f(Y_i; \lambda)} \right)$ .

724 Assumption (12), there exists a constant  $c$  such that if  $t$  is large enough that  $\Pr(R_t^g) \geq 1/2$ ,

$$\mathbb{E}_\gamma \left[ \sum_{a \in \mathcal{A}_{\text{sub}}} N_t^g(a) \mid R_t^g \right] \leq c \log t.$$

725 Since  $j$  is the unique optimal arm under  $\gamma$ ,

$$\mathbb{E}_\gamma \left[ W_t(g) - N_t^g(j) \mid R_t^g \right] \leq c \log t.$$

726 Using Markov's inequality and using the fact that  $W_t(g) \geq \frac{p_g t}{2}$ , we get

$$\begin{aligned}
\Pr_\gamma \left( N_t^g(j) \leq \frac{(1-\delta) \log t}{\text{KL}(\theta_j, \lambda)} \mid R_t^g \right) &= \Pr_\gamma \left( W_t(g) - N_t^g(j) \geq W_t(g) - \frac{(1-\delta) \log t}{\text{KL}(\theta_j, \lambda)} \mid R_t^g \right) \\
&\leq \Pr_\gamma \left( W_t(g) - N_t^g(j) \geq \frac{p_g t}{2} - \frac{(1-\delta) \log t}{\text{KL}(\theta_j, \lambda)} \mid R_t^g \right) \\
&\leq \frac{\mathbb{E} [W_t(g) - N_t^g(j) \mid R_t^g]}{\frac{p_g t}{2} - \frac{(1-\delta) \log t}{\text{KL}(\theta_j, \lambda)}} \\
&= O \left( \frac{\log t}{t} \right).
\end{aligned}$$

727 **Bounding**  $\Pr(C_t \mid R_t^g)$ : Following through with the same steps as the original proof, we can replace  
 728 (2.7) with

$$\Pr_\theta(C_t \mid R_t^g) \leq t^{1-a} \Pr_\gamma(C_t \mid R_t^g) \leq t^{1-a} O\left(\frac{\log t}{t}\right) = O\left(\frac{\log t}{t^a}\right).$$

729 **Bounding**  $\Pr(E_t \mid R_t^g)$ : Next, we need to show a probabilistic result in lieu of (2.8) of [10]. Let  
 730  $m = \frac{(1-\delta)\log t}{\text{KL}(\theta_j, \lambda)}$  and let  $\alpha > 0$  such that  $(1 + \alpha) = \frac{1-a}{1-\delta}$ . We need to upper bound

$$\begin{aligned} \Pr_\theta\left(\max_{j \leq m} L_j > (1-a)\log t\right) &= \Pr_\theta\left(\max_{j \leq m} L_j > (1+\alpha)\text{KL}(\theta_j, \lambda)m\right) \\ &\leq \Pr_\theta\left(\max_{j \leq m} \{L_j - j\text{KL}(\theta_j, \lambda)\} > \alpha\text{KL}(\theta_j, \lambda)m\right). \end{aligned}$$

731 Let  $Z_i = \log\left(\frac{f(Y_i; \theta_j)}{f(Y_i; \lambda)}\right) - \text{KL}(\theta_j, \lambda)$ . We have  $\mathbb{E}[Z_i] = 0$ . Let  $\text{Var}(Z_i) = \sigma^2$ . Then, by Kol-  
 732 mogorov's inequality, we have

$$\begin{aligned} \Pr_\theta\left(\max_{j \leq m} \sum_{i=1}^j Z_i > \alpha\text{KL}(\theta_j, \lambda)m\right) &\leq \frac{1}{\alpha^2 \text{KL}(\theta_j, \lambda)^2 m^2} \text{Var}\left(\sum_{i=1}^m Z_i\right) \\ &= \frac{\sigma^2}{\alpha^2 \text{KL}(\theta_j, \lambda)^2 m} \\ &= O\left(\frac{1}{\log t}\right), \end{aligned}$$

733 since  $m = \Theta(\log t)$ .

734 **Combine:** Combining, we have

$$\begin{aligned} \Pr_\theta\left(N_t(j) \leq \frac{(1-\delta)\log n}{\text{KL}(\theta_j, \lambda)} \mid R_t^g\right) &= \Pr_\theta(C_n \mid R_t^g) + \Pr_\theta(E_n \mid R_t^g) \\ &= O\left(\frac{\log t}{t^a}\right) + O\left(\frac{1}{\log t}\right). \end{aligned}$$

735 Since  $\text{KL}(\theta_j, \lambda) \leq (1+\delta)\text{KL}(\theta_j, \text{OPT}(g))$  and  $\frac{1-\delta}{1+\delta} = 1 - \varepsilon$ , we have

$$\Pr_\theta\left(N_t(j) \leq \frac{(1-\varepsilon)\log t}{\text{KL}(\theta_j, \text{OPT}(g))} \mid R_t^g\right) \leq O\left(\frac{1}{\log t}\right)$$

736 as desired.

737 *Proof of Proposition C.6.* The proof of this result follows the same steps as Proposition C.5. Let  
 738  $\varepsilon = 1/2$  and let  $\theta^* > \theta_j$  so that  $\frac{1-\varepsilon}{\text{KL}(\theta_j, \theta^*)} = b$ . In the proof of Proposition C.5, replace  $\text{OPT}(g)$  with  
 739  $\theta^*$ . Then, the same proof goes through and we get  $\Pr(N_t(j) \leq b \log n \mid R_t^g) = O\left(\frac{1}{\log t}\right)$ .  $\square$

## 740 E Proof of Theorem 4.1

741 To prove Theorem 4.1, our goal is to show that the total number of pulls of a suboptimal arm  $a$  is  
 742  $J(a) \log T$ , and those pulls are distributed amongst groups according to  $q_*^g(a)$ . The policy PF-UCB  
 743 assigns arms in a way that the distribution of groups that have pulled arm  $a$  converges to  $\hat{q}_t^g(a)$ .  
 744 Hence, our goal is to show that  $\hat{q}_t^g(a)$  is usually “close” to  $q_*^g(a)$ .

745 Let  $\delta_0 = \min_{a \neq a'} \frac{|\theta(a) - \theta(a')|}{4}$ . For  $\delta \in (0, \delta_0)$  let  $H_t(\delta) = \{\hat{\theta}_t(a) \in [\theta(a) - \delta, \theta(a) + \delta] \forall a \in \mathcal{A}\}$   
 746 be the event that all arms are within their “ $\delta$ -boundaries”. Since  $\delta < \delta_0$ , this implies that the ranking  
 747 of the arms do not change if  $H_t(\delta)$  is true (i.e.  $\theta(a) < \theta(a') \Rightarrow \hat{\theta}_t(a) < \hat{\theta}_t(a')$ ). We first state a result  
 748 pertaining to the program  $(P(\theta))$ , which states that if  $H_t(\delta)$  is true, the approximate solution  $\hat{q}_t$  is  
 749 also close to the true solution  $q_*$ .

750 **Proposition E.1.** For any  $\varepsilon > 0$ , there exists  $\delta > 0$  such that if  $H_t(\delta)$ , then  $\hat{q}_t^g(a) \in [q_*^g(a) - \varepsilon, q_*^g(a) + \varepsilon]$  for all  $a \in \mathcal{A}$  and  $g \in \mathcal{G}$ .

752 The proof of Proposition E.1 can be found in Appendix G.4. This result implies that when we have  
 753 good empirical estimates of  $\theta$  (i.e.  $H_t(\delta)$  is true), the policy of ‘following’ the solution  $\hat{q}_t^g(a)$  will  
 754 give us the desired ‘split’ of pulls between groups. Therefore, our goal is to show that suboptimal  
 755 arms are pulled only when  $H_t(\delta)$  is true.

756 For  $a \in \mathcal{A}_{\text{sub}}^g$ , there are two reasons why  $\text{Pull}_t^g(a)$  would occur: (i)  $a = A_t^{\text{UCB}}(g')$  for some group  
 757  $g'$ , or (ii)  $a = A_t^{\text{greedy}}(g)$ . We show that the regret from (ii) is negligible:

758 **Proposition E.2.** Let  $g$  be a group, and let  $a \in \mathcal{A}_{\text{sub}}^g$  be a suboptimal arm for  $g$ .

$$\sum_{t=1}^T \Pr(\text{Pull}_t^g(a), A_t^{\text{greedy}}(g) = a) = O(\log \log T).$$

759 Therefore, all of the regret stems from pulls of type (i), when an arm has the highest UCB. The next  
 760 result says that essentially all pulls occur when  $H_t(\delta)$  is true:

761 **Proposition E.3.** Let  $\delta > 0$ . For any group  $g$  and action  $a \in \mathcal{A}_{\text{sub}}^g$ ,

$$\sum_{t=1}^T \Pr(\text{Pull}_t^g(a), A_t^{\text{greedy}}(g) \neq a, \bar{H}_t(\delta)) = O(\log \log T).$$

762 Lastly, we show that the total number of times an arm  $a \in \mathcal{A}_{\text{sub}}$  is pulled matches the lower bound:

763 **Proposition E.4.** Let  $a \in \mathcal{A}_{\text{sub}}$ .

$$\lim_{T \rightarrow \infty} \frac{\mathbb{E}[N_T(a)]}{\log T} = J(a).$$

764 We now prove Theorem 4.1 using Propositions E.2-E.4.

765 *Proof of Theorem 4.1.* Fix a group  $g$  and an arm  $a \in \mathcal{A}_{\text{sub}}^g$ . Let  $\varepsilon > 0$ . Let  $\delta \in (0, \delta_0)$  according to  
 766 Proposition E.1. Let  $H_t = H_t(\delta)$ .

$$\begin{aligned} \mathbb{E}[N_T^g(a)] &= \sum_{t=1}^T \Pr(\text{Pull}_t^g(a)) \\ &= \sum_{t=1}^T (\Pr(\text{Pull}_t^g(a), A_t^{\text{greedy}}(g) \neq a, H_t) \\ &\quad + \Pr(\text{Pull}_t^g(a), A_t^{\text{greedy}}(g) = a) + \Pr(\text{Pull}_t^g(a), A_t^{\text{greedy}}(g) \neq a, \bar{H}_t)) \\ (18) \quad &\leq \sum_{t=1}^T \Pr(\text{Pull}_t^g(a), a \in \mathcal{A}_t^{\text{UCB}}, H_t) + O(\log \log T). \end{aligned}$$

767 where the last step follows from Proposition E.3 and Proposition E.2.

768 First, assume that  $a \notin \mathcal{A}_{\text{sub}}$ . That is, there exists a group  $g'$  such that  $a$  is optimal for  $g'$ . We claim  
 769 that  $\Pr(\text{Pull}_t^g(a) \mid a \in \mathcal{A}_t^{\text{UCB}}, H_t) = 0$ . Notice that when  $H_t$  is true,  $a$  is not the greedy arm for  $g$ ,  
 770 and moreover,  $a \notin \hat{\mathcal{A}}_{\text{sub}}$ . Therefore,  $a$  is not involved in the optimization problem  $(P(\theta))$ , and  $a$  is  
 771 not the greedy arm for  $g$ , so  $g$  would not pull  $a$  when  $H_t$  is true. Therefore,  $\text{Pull}_t^g(a) = 0$  when  $H_t$  is  
 772 true. This implies that if  $a \notin \mathcal{A}_{\text{sub}}$ ,

$$(19) \quad \lim_{T \rightarrow \infty} \frac{\mathbb{E}[N_T^g(a)]}{\log T} = 0.$$

773 Next, assume  $a \in \mathcal{A}_{\text{sub}}$ . By definition of the algorithm, if  $\{\text{Pull}_t^g(a), a \in \mathcal{A}_t^{\text{UCB}}\}$  occurs, then  
 774  $N_t^g(a) \leq \hat{q}_t^g(a)N_t(a)$ . If  $H_t(\delta)$ , then  $\hat{q}_t^g(a) \leq q_t^g(a) + \varepsilon$ . Therefore,  $\sum_{t=1}^T \mathbf{1}(\text{Pull}_t^g(a), a \in$

775  $\mathcal{A}_t^{\text{UCB}}, H_t(\delta)) \leq (q_t^g(a) + \varepsilon)N_T(a)$ . Then, using (18), we can write

$$\begin{aligned} \limsup_{T \rightarrow \infty} \frac{\mathbb{E}[N_T^g(a)]}{\log T} &= \limsup_{T \rightarrow \infty} \frac{\mathbb{E} \left[ \sum_{t=1}^T \mathbf{1}(\text{Pull}_t^g(a), a \in \mathcal{A}_t^{\text{UCB}}, H_t(\delta)) \right] + O(\log \log T)}{\log T} \\ &\leq \limsup_{T \rightarrow \infty} \frac{(q^g(a) + \varepsilon)\mathbb{E}[N_T(a)]}{\log T} \\ &\leq (q^g(a) + \varepsilon)J(a), \end{aligned}$$

776 where the last inequality follows from Proposition E.4. Since this holds for all  $\varepsilon > 0$ ,

$$(20) \quad \limsup_{T \rightarrow \infty} \frac{\mathbb{E}[N_T^g(a)]}{\log T} \leq q^g(a)J(a).$$

777 Recall that Proposition E.4 states

$$(21) \quad \lim_{T \rightarrow \infty} \frac{\mathbb{E}[N_T(a)]}{\log T} = J(a).$$

778 This implies that (20) must be an equality all  $g$ . If this weren't the case, then  $\limsup_{T \rightarrow \infty} \frac{\mathbb{E}[N_T(a)]}{\log T}$   
779 would be strictly less than  $J(a)$ , which would be a contradiction.

780 Moreover, we claim that (20) and (21) implies  $\lim_{T \rightarrow \infty} \frac{\mathbb{E}[N_T^g(a)]}{\log T} = q^g(a)J(a)$  for all  $g$ . By contra-  
781 diction, suppose there exists a  $g' \in \mathcal{G}$  such that  $\liminf_{T \rightarrow \infty} \frac{\mathbb{E}[N_T^{g'}(a)]}{\log T} = q^{g'}(a)J(a) - \alpha$  for some  
782  $\alpha > 0$ . Then, (21) implies that  $\limsup_{T \rightarrow \infty} \sum_{g \neq g'} \frac{\mathbb{E}[N_T^g(a)]}{\log T} \geq (1 - q^{g'}(a))J(a) + \alpha$ , which is a  
783 contradiction. Therefore, for every  $g$ ,

$$\lim_{T \rightarrow \infty} \frac{\mathbb{E}[N_T^g(a)]}{\log T} = q^g(a)J(a).$$

784 Combining with (19) yields the desired result:

$$\lim_{T \rightarrow \infty} \frac{\mathbb{E}[\text{Regret}_T^g(a)]}{\log T} = \lim_{T \rightarrow \infty} \frac{\sum_{a \in \mathcal{A}} \Delta^g(a) \mathbb{E}[N_T^g(a)]}{\log T} = \lim_{T \rightarrow \infty} \sum_{a \in \mathcal{A}_{\text{sub}}} \Delta^g(a) q^g(a) J(a).$$

785 □

## 786 E.1 Proof of Propositions E.2-E.4

787 *Proof of Proposition E.2.* Let  $g \in \mathcal{G}$  and let  $a \in \mathcal{A}_{\text{sub}}^g$ . We bound  $\sum_{t=1}^T \Pr(\text{Pull}_t^g(a), a =$   
788  $A_t^{\text{greedy}}(g))$ . We can assume that the events  $\hat{\theta}_t(a) \in [\theta(a) - \delta, \theta(a) + \delta]$  and  $\Lambda_t$  occur using Lemma B.4,  
789 and Lemma B.2 respectively. Since  $a$  is the greedy arm, it must be that  $\hat{\theta}_t(a') \leq \theta(a) + \delta$  for all  
790  $a' \in \mathcal{A}^g$ .

791 Define the event

$$R_t = \{A_t^{\text{greedy}}(g) = a, \Lambda_t, \hat{\theta}_t(a) \leq \theta(a) + \delta, \hat{\theta}_t(a') \leq \theta(a) + \delta \forall a' \in \mathcal{A}^g\}.$$

792 Our goal is to bound  $\sum_{t=1}^T \Pr(R_t)$ .

793 For  $R_t$  to occur,  $\hat{\theta}_t(a') \leq \theta(a) + \delta$  (since  $a$  is the greedy arm) and  $\text{UCB}_t(a') \geq \text{OPT}(g)$  (since  $\Lambda_t$ )  
794 for all  $a' \in \mathcal{A}_{\text{opt}}^g$ . By Lemma B.3 there exists a constant  $c > 0$  such that if  $N_t(a') > c \log t$  for some  
795  $a' \in \mathcal{A}_{\text{opt}}^g$ ,  $R_t$  cannot happen. Moreover, for every  $a' \in \mathcal{A}_{\text{opt}}^g$ ,  $\Pr(N_t(a') < c \log t) < O\left(\frac{1}{\log t}\right)$   
796 from Proposition C.6.

797 Divide the time period into epochs, where epoch  $k$  starts at time  $s_k = 2^{2^k}$ . Let  $\mathcal{T}_k$  be the time  
798 steps in epoch  $k$ . Let  $G_k = \{N_{s_k}(a) > 3c \log s_k \forall a \in \mathcal{A}_{\text{opt}}^g\}$  be the event that all optimal arms  
799 were pulled at least  $3c \log s_k$  times by the start of epoch  $k$ . If  $G_k$  occurs, since  $s_k = \sqrt{s_{k+1}}$ ,



800  $N_{s_{k+1}}(a) > \frac{3}{2}r \log s_{k+1} > r \log s_{k+1}$ , and hence  $R_t$  can never happen during epoch  $k$ . Moreover,  
 801  $\Pr(\bar{G}_k) = O\left(\frac{1}{\log s_k}\right)$  for any  $k$ .

802 Suppose we are in a “bad epoch”, where  $G_k$  does not occur. We claim that  $R_t$  can’t occur more  
 803 than  $O(\log s_{k+1})$  times during epoch  $k$ . For  $R_t$  to occur, the arm  $j$  with the highest UCB satisfies  
 804  $\text{UCB}_t(j) \geq \text{OPT}(g)$  and  $\hat{\theta}_t(j) \leq \theta(a) + \delta$ .

805 **Claim E.5.** For any action  $j \in \mathcal{A}^g$ ,  $\sum_{t=1}^s \Pr(A_t^{\text{UCB}}(g) = j, \text{UCB}_t(j) \geq \text{OPT}(g), \hat{\theta}_t(j) \leq \theta(a) +$   
 806  $\delta \mid \bar{G}_k) = O(\log s)$ .

807 Using Claim E.5 and taking a union bound over all actions  $j$  implies  $\sum_{t \in \mathcal{T}_k} \Pr(R_t \mid \bar{G}_k) =$   
 808  $\sum_{t \in \mathcal{T}_k} \sum_{j \in \mathcal{A}^g} \Pr(R_t, A_t^{\text{UCB}}(g) = j \mid \bar{G}_k) = O(\log s_{k+1})$ . Since  $\Pr(\bar{G}_k) = O\left(\frac{1}{\log s_k}\right)$ ,  
 809  $\sum_{t \in \mathcal{T}_k} \Pr(R_t) = O(1)$ . Since there are  $O(\log \log T)$  epochs,  $\sum_{t=1}^T \Pr(R_t) = O(\log \log T)$ .

810  $\square$

811 *Proof of Proposition E.3.* Let  $H_t = H_t(\delta)$ . Fix a group  $g$  and an arm  $a \in \mathcal{A}_{\text{sub}}^g$ . For  $g$  to pull  $a$   
 812 when  $A_t^{\text{greedy}}(g) \neq a$ , it must be that  $a \in \mathcal{A}_t^{\text{UCB}}$ .

813 First, assume  $a \notin \mathcal{A}_{\text{sub}}$ . Then, there exist groups  $G \subseteq \mathcal{G}$  in which  $a$  is optimal. If  $a$  is the greedy arm  
 814 for some  $g' \in G$ , then  $a \notin \hat{\mathcal{A}}_{\text{sub}}$ , implying  $a$  is not considered in the optimization problem  $(\hat{P}_t)$ . In  
 815 this case, group  $g$  would never pull arm  $a$ . Therefore, it must be that  $a$  is not the greedy arm for all  
 816 groups in  $G$ . We show the following lemma, which proves the proposition for an arm  $a \notin \mathcal{A}_{\text{sub}}$ .

817 **Lemma E.6.** Let  $a \notin \mathcal{A}_{\text{sub}}$ , and let  $G$  be the set of groups in which  $a$  is optimal. Then,

$$\sum_{t=1}^T \Pr(\text{Pull}_t(a), A_t^{\text{greedy}}(g) \neq a \mid \forall g \in G, a \in \mathcal{A}_t^{\text{UCB}}) = O(\log \log T).$$

818 Now assume  $a \in \mathcal{A}_{\text{sub}}$ . We assume that the events  $\Lambda_t$  and  $\hat{\theta}_t(a) \in [\theta(a) - \delta, \theta(a) + \delta]$  hold using  
 819 Lemma B.2 and Lemma B.4. Since  $a \in \mathcal{A}_t^{\text{UCB}}$  and  $\Lambda_t$ , it must be that  $\text{UCB}_t(a) \geq \text{OPT}(\Gamma(a))$ . Let  
 820  $E_t = \{\text{Pull}_t^g(a), \Lambda_t, \hat{\theta}_t(a) \in [\theta(a) - \delta, \theta(a) + \delta], \text{UCB}_t(a) \geq \text{OPT}(\Gamma(a))\}$ . Our goal is to show

$$\mathbb{E} \left[ \sum_{t=1}^T \mathbf{1}(E_t, \bar{H}_t) \right] = O(\log \log T).$$

821 Divide the time interval into epochs, where epoch  $k$  starts at time  $s_k = 2^{2^k}$ . Let  $K = O(\log \log T)$   
 822 be the total number of epochs. Let  $\mathcal{T}_k$  be the time steps in epoch  $k$ .

823 Let  $H_k = \cap_{t \in \mathcal{T}_k} H_t$ . Clearly, if  $H_k$  is true, then by definition,  $\sum_{t \in \mathcal{T}_k} \mathbf{1}(E_t, \bar{H}_t) = 0$ . Therefore, we  
 824 can write

$$\mathbb{E} \left[ \sum_{t=1}^T \mathbf{1}(E_t, \bar{H}_t) \right] = \sum_{k=1}^K \mathbb{E} \left[ \sum_{t \in \mathcal{T}_k} \mathbf{1}(E_t, \bar{H}_t) \right] = \sum_{k=1}^K \left( \mathbb{E} \left[ \sum_{t \in \mathcal{T}_k} \mathbf{1}(E_t, \bar{H}_t) \mid \bar{H}_k \right] \Pr(\bar{H}_k) \right)$$

825 We bound the expectation and the probability separately.

826 **1) Bounding  $\mathbb{E} \left[ \sum_{t \in \mathcal{T}_k} \mathbf{1}(E_t, \bar{H}_t) \mid \bar{H}_k \right]$ :** If  $E_t$  occurs at some time step  $t$ ,  $\text{UCB}_t(a) \geq$   
 827  $\text{OPT}(\Gamma(a))$  and  $\hat{\theta}_t(a) \leq \theta(a) + \delta$ . By Lemma B.3 it must be that  $N_t(a) = O(\log t)$ . Clearly,  
 828  $N_s(a) \geq \sum_{t=1}^s \mathbf{1}(E_t)$ , implying that  $\sum_{t \in \mathcal{T}_k} \mathbf{1}(E_t) = O(\log s_{k+1})$ . Therefore,  $\sum_{t \in \mathcal{T}_k} \mathbf{1}(E_t, \bar{H}_t) \leq$   
 829  $\sum_{t=1}^{s_{k+1}} \mathbf{1}(E_t) = O(\log s_{k+1})$

830 **2) Bounding  $\Pr(\bar{H}_k)$ :** For  $a \in \mathcal{A}_{\text{sub}}$  let  $c_a = \frac{0.9}{\text{KL}(\theta(a), \text{OPT}(\Gamma(a)))}$ . For  $a \notin \mathcal{A}_{\text{sub}}$ , let  $c_a = 1$ . Let  
 831  $F_k = \{\hat{\theta}_{s_k}(a) \in [\theta(a) - \delta/2, \theta(a) + \delta/2], N_{s_k}(a) \geq c_a \log s_k \mid \forall a \in \mathcal{A}\}$  be the event that at time  
 832  $s_k$ , all arms  $a$  have been pulled  $c_a \log s_k$  times and all arms are within an “inner” boundary (half as  
 833 small as the boundary defined for  $H_t$ ). We bound  $\Pr(\bar{H}_k)$  by conditioning on the event  $F_k$ . Firstly,  
 834 we bound  $\Pr(\bar{F}_k)$  using the probabilistic lower bound of Proposition C.5-C.6:

835 **Lemma E.7.** For any  $k$ ,  $\Pr(\bar{F}_k) = O\left(\frac{1}{\log s_k}\right)$ .

836 Next, we show that if  $F_k$  is true, then  $H_k$  occurs with probability at least  $1 - O\left(\frac{1}{\log s_k}\right)$ .

837 **Lemma E.8.** For any action  $a$ ,  $\Pr\left(\hat{\theta}_t(a) \notin [\theta(a) - \delta, \theta(a) + \delta] \text{ for some } t \in \mathcal{T}_k \mid F_k\right) \leq$   
 838  $O\left(\frac{1}{\log s_k}\right)$ .

839 Therefore,

$$\Pr(\bar{H}_k) \leq \Pr(\bar{F}_k) + \Pr(\bar{H}_k \mid F_k) = O\left(\frac{1}{\log s_k}\right).$$

840 **3) Combine:** Combining, we have

$$\begin{aligned} \mathbb{E}\left[\sum_{t=1}^T \mathbf{1}(E_t, \bar{H}_t)\right] &\leq \sum_{k=1}^K \left(O(\log s_{k+1}) O\left(\frac{1}{\log s_k}\right)\right) \\ &\leq \sum_{k=1}^K O(1) \\ &= O(\log \log T), \end{aligned}$$

841 where the last inequality follows due to the fact that  $\frac{\log s_{k+1}}{\log s_k} = 2$  for any  $k$ .  $\square$

842 *Proof of Proposition E.4.* Let  $a \in \mathcal{A}_{\text{sub}}$ . We need to show  $\limsup_{T \rightarrow \infty} \frac{\mathbb{E}[N_T(a)]}{\log T} \leq J(a)$ , as the  
 843 lower bound is implied by (4). By Proposition E.2, the number of times  $a$  is pulled when  $a$  is the  
 844 greedy arm for some group  $g$  is  $O(\log \log T)$ . Therefore,

$$\mathbb{E}[N_T(a)] = \sum_{t=1}^T \Pr(\text{Pull}_t(a), a \in \mathcal{A}_t^{\text{UCB}}, H_t(\delta)) + O(\log \log T).$$

845 The rest of the proof relies on the same argument as Proposition C.2. The main idea is that after  
 846  $J(a) \log T + o(\log T)$  pulls of  $a$ , the UCB of  $a$  will not be larger than  $\text{OPT}(\Gamma(a))$ , and therefore  
 847  $a \notin \mathcal{A}_t^{\text{UCB}}$ .  $\square$

## 848 E.2 Deferred Proofs

849 *Proof of Claim E.5.* Recall that  $G_k = \{N_{s_k}(a) > 3c \log s_k \mid a \in \mathcal{A}_{\text{opt}}^g\}$ . We will show  
 850  $\sum_{t=1}^T \Pr(A_t^{\text{UCB}} = j, \text{UCB}_t(j) \geq \text{OPT}(g), \hat{\theta}_t(j) \leq \theta(a) + \delta \mid \bar{G}_k) = O(\log \log T)$ . From  
 851 Lemma B.3, there exists a constant  $c'$  such that if  $N_t(j) > c' \log T$  then,  $\{\text{UCB}_t(j) \geq$   
 852  $\text{OPT}(g), \hat{\theta}_t(j) \leq \theta(a) + \delta\}$  cannot occur.

$$\begin{aligned} &\sum_{t \in \mathcal{T}_k} \Pr(A_t^{\text{UCB}}(g) = j, \text{UCB}_t(j) \geq \text{OPT}(g), \hat{\theta}_t(j) \leq \theta(a) + \delta \mid \bar{G}_k) \\ &= \sum_{n=1}^{c' \log T} \sum_{t \in \mathcal{T}_k} \Pr(A_t^{\text{UCB}}(g) = j, \text{UCB}_t(j) \geq \text{OPT}(g), \hat{\theta}_t(j) \leq \theta(a) + \delta, N_t(a) = n \mid \bar{G}_k) \\ (22) \quad &\leq \sum_{n=1}^{c' \log T} \sum_{t \in \mathcal{T}_k} \Pr(A_t^{\text{UCB}}(g) = j, N_t(a) = n \mid \bar{G}_k). \end{aligned}$$

853 Our goal is to show that  $\sum_{t \in \mathcal{T}_k} \Pr(A_t^{\text{UCB}}(g) = j, N_t(a) = n \mid \bar{G}_k) = O(1)$  for any  $n$ . Fix  $n$ , and  
 854 write

$$\sum_{t \in \mathcal{T}_k} \Pr(A_t^{\text{UCB}}(g) = j, N_t(j) = n \mid \bar{G}_k) = \mathbb{E}\left[\sum_{t \in \mathcal{T}_k} \mathbf{1}(A_t^{\text{UCB}}(g) = j, N_t(j) = n) \mid \bar{G}_k\right]$$

Let  $L_t = \mathbf{1}(A_t^{\text{UCB}}(g) = j, N_t(j) = n)$  be the indicator for the event of interest. Our goal is to count the number of times  $L_t$  occurs. Let  $Y_m = \{\exists t : \sum_{s=1}^t L_s = m\}$  be the event that  $L_s$  occurs at least  $m$  times. Note that for  $Y_m$  to occur, it must be that  $Y_{m-1}$  occurred. Therefore, by expliciting writing out the expectation, we have

$$\begin{aligned} \mathbb{E} \left[ \sum_{t=1}^T \mathbf{1}(A_t^{\text{UCB}}(g) = j, N_t(j) = n) \mid \bar{G}_k \right] &\leq \sum_{m \geq 1} m \Pr(Y_m \mid \bar{G}_k) \\ &= \sum_{m \geq 1} m \Pr(Y_m \mid Y_{m-1}, \bar{G}_k) \Pr(Y_{m-1} \mid \bar{G}_k). \end{aligned}$$

We claim that there exists a  $\lambda \in (0, 1)$  such that  $\Pr(Y_m \mid Y_{m-1}, \bar{G}_k) \leq \lambda$ . Let  $\tau$  be the time when  $L_s$  occurred for the  $m-1$ 'th time, which exists since  $Y_{m-1}$  is true. For  $Y_m$  to occur, it must be that arm  $j$  was not pulled at time  $\tau$ , even though arm  $j$  is the UCB. Given that  $j$  is the UCB, there exists a group  $g$  in which  $N_\tau^g(a) \leq \hat{q}_t^g(a) N_\tau(a)$ . If such a group arrives, it will pull  $j$  with probability at least  $\frac{1}{K}$ . Therefore, at time  $\tau$ , the probability that arm  $j$  will be pulled is at least  $\min_{g \in G} \frac{p_g}{K}$ . Then,  $\lambda = 1 - \min_{g \in G} \frac{p_g}{K}$  satisfies  $\Pr(Y_m \mid Y_{m-1}, \bar{G}_k) \leq \lambda$ .

Therefore,

$$\begin{aligned} \mathbb{E} \left[ \sum_{t=1}^T \mathbf{1}(A_t^{\text{UCB}} = j, N_t(j) = n) \mid \bar{G}_k \right] &= \sum_{m \geq 1} m \Pr(Y_m \mid Y_{m-1}, \bar{G}_k) \Pr(Y_{m-1} \mid \bar{G}_k) \\ &\leq \sum_{m \geq 1} m \lambda^m \\ &= O(1). \end{aligned}$$

Substituting back into (22) gives

$$\sum_{t=1}^T \Pr(A_t^{\text{UCB}} = j, \text{UCB}_t(j) \geq \text{OPT}(g), \hat{\theta}_t(j) \leq \theta(a) + \delta \mid \bar{G}_k) \leq \sum_{n=1}^{c' \log T} O(1) = O(\log T).$$

□

*Proof of Lemma E.6.* Let  $a \notin \mathcal{A}_{\text{sub}}$ , let  $G$  be the set of groups in which  $a$  is an optimal arm. We condition on whether  $a$  is the UCB for some group in  $G$ .

First, suppose  $a = A_t^{\text{UCB}}(g)$  for some group  $g \in G$ , implying  $\theta(a) = \text{OPT}(g)$ . We can assume  $\hat{\theta}_t(a) > \text{OPT}(g) - \delta$  from Lemma B.4. Then, if  $a$  is not the greedy arm for  $g$ , there exists a suboptimal arm  $j \in \mathcal{A}_{\text{sub}}^g$  with higher mean but lower UCB than  $a$ . This implies that the UCB radius of  $j$  is smaller than the UCB radius of  $a$ , implying that  $j$  was pulled more times:  $N_t(j) \geq N_t(a)$ . We show that this event cannot happen often. Let  $E_t = \{\text{Pull}_t(a), A_t^{\text{greedy}}(g) \neq a, a \in \mathcal{A}_t^{\text{UCB}}, a = A_t^{\text{UCB}}(g), \hat{\theta}_t(a) > \text{OPT}(g) - \delta\}$ . For any  $j \in \mathcal{A}_{\text{sub}}^g$ ,

$$\begin{aligned} &\sum_{t=1}^T \mathbf{1}(E_t, N_t(j) \geq N_t(a), \hat{\theta}_t(j) > \text{OPT}(g) - \delta) \\ &\leq \sum_{t=1}^T \sum_{n=1}^t \sum_{n_j=n}^t \mathbf{1}(E_t, \hat{\theta}_{n_j}(j) > \text{OPT}(g) - \delta, N_t(j) = n_j, N_t(a) = n) \\ &\leq \sum_{n_j=1}^T \mathbf{1}(\hat{\theta}_{n_j}(j) > \text{OPT}(g) - \delta) \sum_{n=1}^{n_j} \sum_{t=n}^T \mathbf{1}(E_t, N_t(a) = n) \\ &\leq \sum_{n_j=1}^T \mathbf{1}(\hat{\theta}_{n_j}(j) > \text{OPT}(g) - \delta) n_j, \end{aligned}$$

where the last inequality uses  $\sum_{t=n}^T \mathbf{1}(E_t, N_t(a) = n) \leq 1$  (since pulling arm  $a$  increasing  $N_t(a)$  by 1). Since  $\Pr(\hat{\theta}_n(j) > \text{OPT}(g) - \delta) \leq \exp(-cn)$  for some constant  $c > 0$ ,  $\sum_{t=1}^T \Pr(E_t, N_t(j) \geq N_t(a), \hat{\theta}_t(j) > \text{OPT}(g) - \delta) = O(1)$ . Taking a union bound over actions  $j \in \mathcal{A}_{\text{sub}}^g$  gives us the desired result:

$$\sum_{t=1}^T \Pr(\text{Pull}_t(a), A_t^{\text{greedy}}(g) \neq a \ \forall g \in G, a \in \mathcal{A}_t^{\text{UCB}}, \exists g \in G : a = A_t^{\text{UCB}}(g)) = O(\log \log T).$$

Now, suppose  $a \notin A_t^{\text{UCB}}(g)$  for all  $g \in G$ . This means that there is another group  $h$  where  $a = A_t^{\text{UCB}}(h)$ , but  $a$  is suboptimal for  $h$ . We assume  $\Lambda_t$  holds. Let  $a_h$  be an optimal arm for  $h$ . Since  $\Lambda_t$ ,  $\text{UCB}_t(a_h) \geq \text{OPT}(h)$ . Therefore, it must be that  $\text{UCB}_t(a) \geq \text{OPT}(h)$ . By Lemma C.4,

$$\sum_{t=1}^T \Pr(\text{Pull}_t(a), \text{UCB}_t(a) \geq \text{OPT}(h)) = O(\log \log T).$$

This finishes the proof.  $\square$

*Proof of Lemma E.7.* Fix  $a \in \mathcal{A}$  and time  $t$ . We will show  $\Pr(\hat{\theta}_{s_k}(a) \in [\theta(a) - \delta/2, \theta(a) + \delta/2], N_{s_k}(a) \geq c_a \log s_k) \geq 1 - O\left(\frac{1}{\log t}\right)$ . Then the result follows from taking a union bound over actions. We first show that PF-UCB is log-consistent.

**Lemma E.9.** *PF-UCB is log-consistent.*

Let  $g \in \Gamma(a)$ . Since  $\Pr(M_t(a) < \frac{p_a}{2}t) \leq \exp(-\frac{1}{2}p_g t)$ , we can assume that there have been at least  $\frac{p_a}{2}t$  arrivals of  $g$  by time  $t$ . Then, using Proposition C.5 and Proposition C.6, we know that at time  $t$ ,  $\Pr(N_t(a) < c_a \log t | M_t(a) \geq \frac{p_a}{2}t) \leq O\left(\frac{1}{\log t}\right)$ . Next, we show that the probability of the event  $\hat{\theta}_t(a) \notin [\theta(a) - \delta/2, \theta(a) + \delta/2]$  given that we have more than  $c_a \log t$  pulls of  $a$  is small.

$$\begin{aligned} & \Pr(\hat{\theta}_t(a) \notin [\theta(a) - \delta/2, \theta(a) + \delta/2] \mid N_t(a) \geq c_a \log t) \\ &= \sum_{n=c_a \log t}^t \Pr(\hat{\theta}_n(a) \notin [\theta(a) - \delta/2, \theta(a) + \delta/2] \mid N_t(a) = n) \Pr(N_t(a) = n) \\ &\leq \sum_{n=c_a \log t}^t \exp(-c_1 n) \Pr(N_t(a) = n) \\ &\leq c_3 \exp(-c_2 \log t) \\ &\leq \frac{c_3}{t^{c_2}}, \end{aligned}$$

for some constants  $c_1, c_2, c_3 > 0$  that depends on the instance,  $a$ , and  $\delta$ . Combining, we have that for any action  $a$ ,  $\Pr(\hat{\theta}_{s_k}(a) \in [\theta(a) - \delta/2, \theta(a) + \delta/2], N_{s_k}(a) \geq c_a \log s_k) \geq 1 - O\left(\frac{1}{\log t}\right)$ .

$\square$

*Proof of Lemma E.8.* Let  $U_a = \theta(a) + \delta$  and  $U_a^I = \theta(a) + \delta/2$ . Let  $\eta = U_a - U_a^I$ . Since  $F_k$  is true,  $N_{s_k}(a) \geq c_a \log s_k$ . Let  $n_1 = N_{s_k}(a)$ . Let  $\hat{\theta}^{n_1}(a)$  be the empirical average of arm  $a$  after  $n$  pulls. We will bound

$$\Pr(\cup_{n_2=n_1+1}^{\infty} \{\hat{\theta}^{n_2}(a) \notin [L_a, U_a]\} \mid \hat{\theta}^{n_1}(a) \in [L_a^I, U_a^I]).$$

898 For any  $n_2$ ,  $\hat{\theta}^{n_2}(a) > U_a$  implies  $\hat{\theta}^{n_2}(a) > \hat{\theta}^{n_1}(a) + \eta$ . Fix  $n_2 > n_1$ . Let  $m = n_2 - n_1$ .

$$\begin{aligned} \left\{ \hat{\theta}^{n_2}(a) > U_a \right\} &= \left\{ \sum_{i=1}^{n_2} X_i > n_2 U_a \right\} \\ &= \left\{ n_1 \hat{\theta}^{n_1}(a) + \sum_{i=n_1+1}^{n_2} X_i > n_2 U_a \right\} \\ &= \left\{ \sum_{j=1}^m X_{n_1+j} > n_1(U_a - \hat{\theta}^{n_1}(a)) + m U_a \right\} \\ &= \left\{ \sum_{j=1}^m (X_{n_1+j} - \mu) > n_1(U_a - \hat{\theta}^{n_1}(a)) + m(U_a - \mu) \right\} \end{aligned}$$

899 **Case  $m \leq n_1$ :** Since  $U_a - \mu > 0$  and  $U_a - \hat{\theta}^{n_1}(a) > \eta$  if  $F_k$  is true,

$$\begin{aligned} \Pr \left( \bigcup_{m=1}^{n_1} \{ \hat{\theta}^{n_1+m}(a) > U_a \} \mid F_k \right) &\leq \Pr \left( \bigcup_{m=1}^{n_1} \left\{ \sum_{j=1}^m (X_{n_1+j} - \mu) > n_1 \eta \right\} \mid F_k \right) \\ &\leq \Pr \left( \max_{m=1, \dots, n_1} S_m > n_1 \eta \mid F_k \right), \end{aligned}$$

900 where  $S_m = \sum_{j=1}^m (X_{n_1+j} - \mu)$ . Given that  $X_{n_1+j} - \mu$  are zero mean independent random variables,  
901 by Kolomogorov's inequality, we have

$$\begin{aligned} \Pr \left( \bigcup_{m=1}^{n_1} \{ \hat{\theta}^{n_1+m}(a) > U_a \} \mid F_k \right) &\leq \frac{1}{n_1^2 \eta^2} \text{Var}(S_{n_1}) \\ &= \frac{\sigma^2}{n_1 \eta^2} \\ &= \frac{\sigma^2}{\eta^2} \cdot \frac{1}{c_a \log s_k}, \end{aligned}$$

902 where  $\sigma_2 = \text{Var}(X_1)$ .

903 **Case  $m > n_1$ :**

$$\begin{aligned} \Pr \left( \bigcup_{m=n_1}^{\infty} \{ \hat{\theta}^{n_1+m}(a) > U_a \} \mid F_k \right) &\leq \Pr \left( \bigcup_{m=n_1}^{\infty} \left\{ \frac{\sum_{j=1}^m (X_{n_1+j} - \mu)}{m} > U_a - \mu \right\} \mid F_k \right) \\ &\leq \sum_{m=n_1}^{\infty} \Pr \left( \frac{\sum_{j=1}^m (X_{n_1+j} - \mu)}{m} > U_a - \mu \mid F_k \right) \\ &\leq \sum_{m=n_1}^{\infty} \exp(-mD) \\ &= \frac{\exp(-n_1 D)}{1 - \exp(-D)} \\ &= \frac{1}{s_k^{c_a D} (1 - \exp(-D))}, \end{aligned}$$

904 for a constant  $D > 0$  that depends on  $U_a - \mu$  and  $\sigma^2$ .

905 Therefore,

$$\begin{aligned}
& \Pr \left( \bigcup_{m=1}^{\infty} \{ \hat{\theta}^{N_{s_k}(a)+m}(a) > U_a \} \mid F_k \right) \\
& \leq \Pr \left( \bigcup_{m=1}^{n_1} \{ \hat{\theta}^{N_{s_k}(a)+m}(a) > U_a \} \mid F_k \right) + \Pr \left( \bigcup_{m=n_1}^{\infty} \{ \hat{\theta}^{N_{s_k}(a)+m}(a) > U_a \} \mid F_k \right) \\
& \leq \frac{\sigma^2}{\eta^2} \cdot \frac{1}{c_a \log s_k} + \frac{1}{s_k^{c_a D} (1 - \exp(-D))} \\
& = O \left( \frac{1}{\log s_k} \right),
\end{aligned}$$

906 as desired.  $\square$

907 *Proof of Lemma E.9.* Fix a group  $g$ . At time  $t$ , if group  $g$  arrives, the PF-UCB pulls either the UCB  
 908 arm or the greedy arm. The original regret analysis of KL-UCB from [28] shows that

$$\sum_{t=1}^T \Pr(A_t \notin \mathcal{A}_{\text{opt}}^g, A_t = A_t^{\text{UCB}}, g_t = g) = O(\log T).$$

909 Proposition E.2 shows that the number of times the greedy arm is pulled and incurs regret is  
 910  $O(\log \log T)$ . Combining, the total regret is  $O(\log T)$ .  $\square$

## 911 F Price of Fairness Proofs

### 912 F.1 Proof of Theorem 4.2

913 *Proof.* Consider the set of profiles  $(s^g)_{g \in \mathcal{G}}$  that are in the feasible region of the polytope defined  
 914 by the constraints of  $(P(\theta))$ . Refer to this polytope as the “utility set”, in the language of [29]. This  
 915 utility set is compact and convex, and therefore we can apply Theorem 2 of [29], which gives us  
 916 the desired inequality. It is easy to see that the point in this utility set that maximizes total utility  
 917 corresponds to a regret-optimal policy, and the point in the utility set that maximizes proportional  
 918 fairness corresponds to PF-UCB (by definition, since PF-UCB maximizes proportional fairness within  
 919 this set).  $\square$

### 920 F.2 Proof of Proposition 4.3

921 *Proof.* In this proof, for convenience, we use subscripts instead of superscript to refer to groups  $g$   
 922 since we do not need to refer to time steps.

923 Let  $\{1, \dots, M\}$  be the set of shared arms, where  $\theta_1 \leq \dots \leq \theta_M$ . Let  $\mathcal{G} = [G]$  be the set of  
 924 groups, where  $\text{OPT}(1) \leq \dots \leq \text{OPT}(G)$ . We assume that  $\theta_M < \text{OPT}(1)$ . (If there is a shared  
 925 arm whose reward is as large as  $\text{OPT}(1)$ , then neither policy will incur any regret from this arm,  
 926 and hence this arm is irrelevant.) In this case, all of the regret in the regret-optimal solution goes  
 927 to group 1, and the other groups incur no regret. Therefore, the total utility gain of the regret-  
 928 optimal solution is the sum of the regret at the disagreement point for groups 2 to  $G$ . Specifically,  
 929  $\lim_{T \rightarrow \infty} \text{SYSTEM}_T(\mathcal{I}) = \lim_{T \rightarrow \infty} \sum_{g=2}^G \frac{\tilde{R}_T^g(\pi^{\text{KL-UCB}})}{\log T}$ .

930 We will show that for each group  $g \geq 2$ , the regret incurred from PF-UCB is less than half of the  
 931 regret at the disagreement point — i.e.  $R_T^g(\pi^{\text{PF-UCB}}, \mathcal{I}) \leq \frac{1}{2} \tilde{R}_T^g(\mathcal{I})$ . Then, the utility gain for the  
 932 group reduces by at most a half from the regret-optimal solution, which is our desired result.

933 Let  $R_g = \lim_{T \rightarrow \infty} \frac{R_T^g(\pi^{\text{PF-UCB}}, \mathcal{I})}{\log T}$  and  $\tilde{R}_g = \lim_{T \rightarrow \infty} \frac{\tilde{R}_T^g(\mathcal{I})}{\log T}$  for all  $g \in \mathcal{G}$ . Recall that the proportion-  
 934 ally fair solution comes out of the optimal solution to the following optimization problem:

$$(P(\theta)) \quad \begin{aligned} \max_{q \geq 0} \quad & \sum_{g \in \mathcal{G}} \log \left( \sum_{a \in \mathcal{A}_{\text{sub}}^g} \Delta^g(a) (J^g(a) - q^g(a) J(a)) \right)^+ \\ \text{s.t.} \quad & \sum_{g \in \mathcal{G}} q^g(a) = 1 \quad \forall a \in \mathcal{A}_{\text{sub}} \\ & q^g(a) = 0 \quad \forall g \in G, a \notin \mathcal{A}_{\text{sub}} \cap \mathcal{A}_g. \end{aligned}$$

935 We first show a structural result of the optimal solution. Note that in terms of minimizing total regret,  
 936 it is optimal for group 1 to pull all suboptimal arms. Therefore, if  $q_g(a) > 0$  for some  $g > 1$ , we  
 937 think of this as “transferring” pulls of arm  $a$  from group 1 to group  $g$ . This transfer increases the  
 938 regret by a factor of  $\frac{\Delta_g(a)}{\Delta_1(a)}$ . We prove the following property that these transfers must satisfy:

939 **Claim F.1** (Structure of Optimal Solution). *For  $g \in [M]$ , let  $b = \max\{a : q_g(a) > 0\}$ . If  $h < g$ ,  
 940 then  $q_h(a) = 0$  for all  $a < b$ .*

941 Writing out the KKT conditions of the optimization problem gives us the following result.

942 **Claim F.2** (KKT conditions). *Let  $g, h \in \mathcal{G}$ ,  $a \in \mathcal{A}$  such that  $q_g(a) > 0$  and  $h < g$ . Then,  
 943  $s_g \geq s_h \frac{\Delta_g(a)}{\Delta_h(a)}$ . Moreover, if  $q_1(a) > 0$ ,  $s_g \leq \frac{\Delta_2(a)}{\Delta_1(a)} s_1$  for any  $g > 1$ .*

944 The next claim is immediate from Claim F.2.

945 **Claim F.3.** *If  $h < g$  and there exists an arm  $a$  such that  $q_g(a) > 0$ , then  $s_g \leq s_h$ .*

946 Regret is minimized if  $q_1(a) = 1$  for all  $a$ , in which case  $s_1 = 0$ . If  $s_1 \neq 0$ , then we think of this  
 947 as pulls from group 1 that are re-allocated to other groups  $g \neq 1$ . This re-allocation increases total  
 948 regret, since other groups incur more regret from pulling any arm compared to group 1.

949 Let  $a_0 = \max\{a : q_g(a) \neq 1\}$ . All pulls for any action  $a > a_0$  come from group 1. We claim that  
 950  $q_2(a_0) > 0$ . Suppose not. Let  $a' > 2$  such that  $q_2(a_0) > 0$ . Then, by Claim F.1,  $q_2(a) = 0$  for  
 951 all  $a$ . This implies that  $s_2 = r_2 > r_{a'} \geq s_{a'}$ , which contradicts Claim F.3. Then, by Claim F.2,  
 952  $s_2 = s_1 \frac{\Delta_2(a_0)}{\Delta_1(a_0)}$ .

953 Next, we claim that  $s_2 \geq \frac{\tilde{R}_2}{2}$ , which proves the desired result for  $g = 2$ . Note that  $s_1$  represents the  
 954 amount of regret that was “transferred” from group 1 to other groups, which increases the total regret.  
 955 If all of this was transferred to group 2, the total regret from group 2 would be at most  $s_1 \frac{\Delta_2(a_2)}{\Delta_1(a_2)} \leq s_2$ .  
 956 Therefore,  $R_2 \leq s_2$ . Since  $R_2 + s_2 = \tilde{R}_2$ ,  $s_2 \geq \frac{\tilde{R}_2}{2}$ .

957 For  $g > 2$ , Claim F.2 shows  $s_g \geq s_2$ . Moreover, since  $\text{OPT}(g) \geq \text{OPT}(2)$ ,  $\tilde{R}_g \leq \tilde{R}_2$ . Therefore,  
 958  $s_g \geq s_2 \geq \frac{\tilde{R}_2}{2} \geq \frac{\tilde{R}_g}{2}$  as desired.

959 □

### 960 F.3 Proof of Claims

961 *Proof of Claim F.1.* Suppose not. Let  $g \in \mathcal{G}$  and  $b = \max\{a : q_g(a) > 0\}$ . Let  $a < b$  such that  
 962  $q_h(a) > 0$ . Then, since  $\sum_{g'} q_{g'}(a) = 1$ ,  $q_g(a) < 1$ . By the ordering of arms and groups, we have

$$(23) \quad \frac{\Delta_h(a)}{\Delta_g(a)} > \frac{\Delta_h(b)}{\Delta_g(b)}.$$

963 We essentially show, using this inequality, that if we want to “transfer” pulls from group  $h$  to  $g$ , it  
 964 is more efficient to do so using arm  $a$  rather than arm  $b$ , and hence it is a contradiction that  $q_h(b)$  is  
 965 positive.

966 We construct a “swap” that will strictly increase the objective function. Let  $\varepsilon = \min\{q_h(a), q_g(b), 1 -$   
 967  $q_g(a), 1 - q_h(b)\}$ .

- Decrease  $q_h(a)$  by  $\varepsilon$ , and increase  $q_h(b)$  by  $\frac{\Delta_h(a)J(a)}{\Delta_h(b)J(b)}\varepsilon \leq \varepsilon$ , where the last inequality follows from the convexity of  $\text{KL}(\theta_b, \cdot)$ . By construction,  $s_h$  does not change.
- Increase  $q_g(a)$  by  $\varepsilon$ , and decrease  $q_g(b)$  by  $\frac{\Delta_h(a)J(a)}{\Delta_h(b)J(b)}\varepsilon$ . The first operation decreases  $s_g$  by  $\Delta_g(a)J(a)\varepsilon$ , while the second operation increases  $s_g$  by  $\frac{\Delta_h(a)J(a)\Delta_g(b)}{\Delta_h(b)}\varepsilon$ . By (23), this strictly increases  $s_g$  overall.

This is a contradiction.  $\square$

*Proof of Claim F.2.* From the stationarity KKT condition, we have that

$$\frac{\Delta_g(a)J(a)}{s_g} + \lambda(a) - \mu_g(a) = 0,$$

$$\frac{\Delta_h(a)J(a)}{s_h} + \lambda(a) - \mu_h(a) = 0,$$

for some  $\lambda_a \in \mathbb{R}$  and  $\mu_g(a), \mu_h(a) \geq 0$ . From complementary slackness,  $\mu_g(a)q_g(a) = 0$ . Since  $q_g(a) > 0$ , it must be that  $\mu_g(a) = 0$ . Since  $\mu_h(a) \geq 0$ ,  $\frac{\Delta_g(a)J(a)}{s_g} \leq \frac{\Delta_h(a)J(a)}{s_h}$ .  $\square$

## G Other Proofs

### G.1 Proof that Nash Solution is Unique Under Grouped Bandit Model

The uniqueness of the Nash bargaining solution in the general bargaining problem requires that the set  $U$  is convex. In the grouped bandit model, it is not clear that the set  $U(\mathcal{I}) = \{(\text{UtilGain}^g(\pi, \mathcal{I}))_{g \in \mathcal{G}} : \pi \in \Psi\}$  is convex. In this section, we show that the uniqueness theorem still holds in the grouped bandit setting.

Let  $G$  be the number of groups. Let  $W(u) = \sum_{g \in \mathcal{G}} \log u_g$ , and let  $f(U) = \arg\max_{u \in U} W(u)$  for  $U \subseteq \mathbb{R}^G$ . Fix a grouped bandit instance  $\mathcal{I}$ , and let  $u^* = f(U(\mathcal{I}))$ . We first show that  $u^*$  is unique (i.e.  $\arg\max_{u \in U(\mathcal{I})} W(u)$  is unique). Suppose there was another  $u' \in U(\mathcal{I})$  with the same welfare. Then, let  $\bar{u} \in U(\mathcal{I})$  be the policy that runs  $u'$  with probability 50%, and  $u^*$  with probability 50%. Using the fact that  $\liminf_{T \rightarrow \infty} (a_T + b_T) \geq \liminf_{T \rightarrow \infty} a_T + \liminf_{T \rightarrow \infty} b_T$  implies that  $\bar{u}_g \geq \frac{1}{2}(u_g^* + u'_g)$  for all  $g$ . Since  $\log$  is strictly concave,  $\log \bar{u}_g > \frac{1}{2}(\log u_g^* + \log u'_g)$ . This implies  $W(\bar{u}) > W(u^*)$ , which is a contradiction.

Next, we show that  $f$  is the unique solution that satisfies the four axioms. Let  $U = U(\mathcal{I})$ . It is easy to see that this solution satisfies the axioms. We need to show that no other solution satisfies them. Suppose  $g(\cdot)$  satisfies the axioms. We need to show  $g(U) = f(U)$ . Let  $U' = \{(\alpha_g u_g)_{g \in \mathcal{G}} : u \in U; \alpha_g u_g^* = 1, \alpha_g > 0\}$ .  $U'$  is the translated utility set so that  $u^*$  becomes the 1 vector. Then, the optimal welfare is  $W(\mathbf{1}) = 0$ . We need to show  $g(U') = \mathbf{1}$ . We claim that there is no  $v \in U'$  such that  $\sum_{g \in \mathcal{G}} v_g > G$ . Assume that such a  $v$  exists. For  $\lambda \in (0, 1)$ , let  $t$  be the utilities from the policy that runs the policy induced by  $v$  with probability  $\lambda$ , and the policy induced by  $\mathbf{1}$  with probability  $1 - \lambda$ . Then, by the same argument with  $\liminf$  to prove uniqueness,  $t_g \geq \lambda v_g + (1 - \lambda)1$ . If  $\lambda$  is small enough, then  $\sum_{g \in \mathcal{G}} \log t_g > 0$ . This is a contradiction to  $\mathbf{1}$  maximizing  $W(\cdot)$ .

Consider the symmetric set  $U'' = \{u \in \mathbb{R}^G : u \geq 0, \sum_g u_g \leq G\}$ . We have shown that  $U' \subseteq U''$ . By Pareto efficiency and symmetry, it must be that  $g(U'') = \mathbf{1}$ . By independence of irrelevant alternatives,  $g(U') = \mathbf{1}$ , and we are done.

### G.2 Proof that Assumption 2.2 is Sufficient

**Proposition G.1.** *If an instance  $\mathcal{I}$  satisfies Assumption 2.2, then there exists a consistent policy  $\pi$  such that  $f(\pi) > -\infty$ . Otherwise,  $f(\pi) = -\infty$  for all  $\pi \in \Psi$ .*

*Proof.* First, suppose  $\mathcal{I}$  satisfies Assumption 2.2. We need to show that there exists a consistent policy such that  $f(\pi) > -\infty$ . We will construct a feasible solution to the optimization problem  $(P(\theta))$  with a strictly positive objective value. This will imply that the objective value  $Y^*$  is strictly larger than 0, and hence the social welfare of PF-UCB is higher than  $-\infty$ .



For each arm  $a \in \mathcal{A}$ , let  $g(a) \in \Gamma(a)$ . Start with  $q^{g(a)}(a) = 1$  for all  $a$  and  $q^g(a) = 0$  for  $g \neq g(a)$ . We will modify these values for suboptimal arms  $\mathcal{A}_{\text{sub}}$ . For arm  $a \in \mathcal{A}_{\text{sub}}$ , let  $g'(a) \neq g(a)$  be another group with access to arm  $a$ . We will “split” the pulls of arm  $a$  between groups  $g(a)$  and  $g'(a)$  in a way that both groups benefit from the disagreement point. Let  $p(a) \in [0, 1]$  such that  $p(a)J(a) = J^{g'(a)}(a)$ . Let  $q^{g'(a)} = p(a)/2$  and  $q^{g(a)} = 1 - p(a)/2$ . Then,  $J^g(a) - q^g(a)J(a) > 0$  for  $g \in \{g(a), g'(a)\}$ . This implies that  $s^g > 0$  for all  $g$ , and therefore  $Y^* > 0$ . This proves the first part of the proposition.

For the second statement, suppose  $\mathcal{I}$  does not satisfy Assumption 2.2. Let  $g'$  be the group that does not have a suboptimal arm that is shared with another group. First, suppose  $g'$  does not have any suboptimal arms. Then, all arms available to group  $g'$  is optimal, so group  $g'$  will incur zero regret regardless of the algorithm. Hence, the utility gain for group  $g'$  is exactly 0, and therefore  $W(\pi, \mathcal{I}) = -\infty$  for any  $\pi$ .

Next, suppose  $g'$  does have a suboptimal arm but it is not shared. Let  $\pi$  be a consistent policy. Then from the following upper bound on Nash SW from Section 3.2,

$$W(\pi, \mathcal{I}) \leq \liminf_{T \rightarrow \infty} \sum_{g \in \mathcal{G}} \log \left( \sum_{a \in \mathcal{A}^g} \Delta^g(a) (J^g(a) - q_T^g(a, \pi)J(a)) \right)^+.$$

Since  $g'$  is the only group with access to arm  $a$  for every  $a \in \mathcal{A}_{\text{sub}}^{g'}$ , it must be that  $q_T^{g'}(a, \pi) = 1$  for every  $a \in \mathcal{A}_{\text{sub}}^{g'}$ . Moreover,  $J^{g'}(a) = J(a)$  for every  $a \in \mathcal{A}_{\text{sub}}^{g'}$ . This implies that the term corresponding to  $g'$  in the sum equals  $\log 0 = -\infty$ . Therefore,  $W(\pi, \mathcal{I}) = -\infty$  for any  $\pi \in \Psi$ .  $\square$

### 1026 G.3 Omitted Details of Theorem 3.2

We provide details on the two steps in Section 3.2 starting from (9). (4) implies that for every  $\varepsilon > 0$ , there exists a  $T_\varepsilon$  such that if  $T \geq T_\varepsilon$ , then

$$\frac{\mathbb{E}[N_T(a)]}{\log T} \geq (1 - \varepsilon)J(a).$$

Therefore, for large enough  $T$ , plugging into (9), we get

$$\frac{R_T^g(\pi, \mathcal{I})}{\log T} \geq \sum_{a \in \mathcal{A}_{\text{sub}}} \Delta^g(a) q_T^g(a, \pi) J(a) (1 - \varepsilon).$$

This implies that

$$\limsup_{T \rightarrow \infty} \frac{R_T^g(\pi, \mathcal{I})}{\log T} \geq \limsup_{T \rightarrow \infty} (1 - \varepsilon) \sum_{a \in \mathcal{A}_{\text{sub}}} \Delta^g(a) q_T^g(a, \pi) J(a).$$

Since this holds for every  $\varepsilon > 0$  and the RHS is continuous in  $\varepsilon$ ,

$$(24) \quad \limsup_{T \rightarrow \infty} \frac{R_T^g(\pi, \mathcal{I})}{\log T} \geq \limsup_{T \rightarrow \infty} \sum_{a \in \mathcal{A}_{\text{sub}}} \Delta^g(a) q_T^g(a, \pi) J(a).$$

Plugging in (24) into the definition of  $\text{UtilGain}^g(\pi, \mathcal{I})$  gives

$$\text{UtilGain}^g(\pi, \mathcal{I}) \leq \liminf_{T \rightarrow \infty} \sum_{a \in \mathcal{A}_{\text{sub}}^g} \Delta^g(a) (J^g(a) - q_T^g(a, \pi)J(a) \mathbf{1}\{a \in \mathcal{A}_{\text{sub}}\}).$$

Using the definition of  $W(\pi, \mathcal{I})$  and taking the  $\liminf$  outside of the sum gives

$$W(\pi, \mathcal{I}) \leq \liminf_{T \rightarrow \infty} \sum_{g \in \mathcal{G}} \log \left( \sum_{a \in \mathcal{A}_{\text{sub}}^g} \Delta^g(a) (J^g(a) - q_T^g(a, \pi)J(a) \mathbf{1}\{a \in \mathcal{A}_{\text{sub}}\}) \right)^+.$$

### 1034 G.4 Proof of Proposition E.1

*Proof.* First, we prove the statement with respect to the variables  $(s^g)_{g \in \mathcal{G}}$ . Let  $f_s(s) = \sum_{g \in \mathcal{G}} \log s^g$ , and let  $s_*^g = \sum_{a \in \mathcal{A}^g} \Delta^g(a) (J^g(a) - q_*^g(a)J(a))$  and  $\hat{s}_t^g = \sum_{a \in \mathcal{A}^g} \hat{\Delta}^g(a) (\hat{J}_t^g(a) - \hat{q}_t^g(a)\hat{J}_t(a))$ . Since  $f_s$  is strictly concave with respect to  $s$ ,  $s_*^g$  is unique. Define the event  $H_t(\delta) = \{\hat{\theta}_t(a) \in [\theta(a) - \delta, \theta(a) + \delta] \text{ for all } a \in \mathcal{A}\}$ .

1039 **Lemma G.2.** For any  $\varepsilon > 0$ , there exists  $\delta > 0$  such that if  $H_t(\delta)$ , then  $\hat{s}_t^g \in [s_*^g - \varepsilon, s_*^g + \varepsilon]$  for all  
1040  $g \in \mathcal{G}$ .

1041 This shows that if  $H_t(\delta)$ , then the variables  $\hat{s}_t^g$  are close to  $s_*^g$  for all  $g$ . Next, we need to show that  
1042 the corresponding  $q$ 's are also close. Let  $\text{proj}(z, P)$  be the projection of point  $z$  onto a polytope  $P$ .

1043 Let  $Q = \{q : \sum_{g \in \mathcal{G}} q^g(a) = 1 \ \forall a \in \mathcal{A}_{\text{sub}}, q^g(a) = 0 \ \forall g \in G, a \notin \mathcal{A}_{\text{sub}}, q^g(a) \geq 0 \ \forall g \in$   
1044  $G, a \in \mathcal{A}\}$  be the feasible space. Let  $S^g(q, \tilde{\theta}) = \sum_{a \in \mathcal{A}^g} \tilde{\Delta}^g(a) (\tilde{J}^g(a) - q^g(a) \tilde{J}(a))$ , where  
1045  $\tilde{\Delta}^g(a)$ ,  $\tilde{J}^g(a)$ , and  $\tilde{J}(a)$  are computed with  $\tilde{\theta}$ .

1046 Given  $s = (s^g)_{g \in \mathcal{G}}$ , let  $Q(s, \tilde{\theta}) = \{q^g(a) \in Q : S^g(q, \tilde{\theta}) = s^g\}$  be the set of all feasible  $q$ 's that  
1047 corresponds to the solution  $s$  under the parameters  $\tilde{\theta}$ . Note that  $Q(s, \tilde{\theta})$  is a linear polytope, and we  
1048 can write it as  $Q(s, \tilde{\theta}) = \{q : A(\tilde{\theta})q = b(s), q \geq 0\}$  for a matrix  $A(\tilde{\theta})$  and a vector  $b(s)$ . We are  
1049 interested in the polytopes  $Q(s, \theta)$  and  $Q(\hat{s}_t, \hat{\theta}_t)$ , which correspond the optimal solutions of  $(P(\theta))$   
1050 and  $(\hat{P}_t)$  respectively. The next two lemmas state that these polytypes are close together:

1051 **Lemma G.3.** Let  $\varepsilon > 0$ . There exists  $\delta > 0$  such that if  $H_t(\delta)$ , for any  $\hat{q} \in Q(\hat{s}_t, \hat{\theta}_t)$ ,  
1052  $\|\text{proj}(\hat{q}, Q(s, \theta)) - \hat{q}\|_2 \leq \varepsilon$ .

1053 **Lemma G.4.** Let  $\varepsilon > 0$ . There exists  $\delta > 0$  such that if  $H_t(\delta)$ , for any  $q \in Q(s, \theta)$ ,  
1054  $\|\text{proj}(q, Q(\hat{s}_t, \hat{\theta}_t)) - q\|_2 \leq \varepsilon$ .

1055 Let  $q_* = \text{argmin}_{q \in Q(s, \theta)} \|q\|_2^2$ ,  $\hat{q} = \text{argmin}_{q \in Q(\hat{s}_t, \hat{\theta}_t)} \|q\|_2^2$ . Our goal is to show  $\|q_* - \hat{q}\|_1 \leq \varepsilon$ .  
1056 Let  $R(\eta) = \{q \in Q(s, \theta) : \|q\|_2 \leq \|q_*\|_2 + \eta\}$  for  $\eta > 0$ . Since the function  $\|\cdot\|_2^2$  is strongly  
1057 convex and  $q_*$  is minimizer, we have the following result:

1058 **Claim G.5.** For every  $\varepsilon > 0$ , there exists  $\eta > 0$  such that if  $q \in R(\eta)$ , then  $\|q - q_*\|_2 \leq \varepsilon$ .

1059 First, assume  $\|\hat{q}_t\|_2 \leq \|q_*\|_2$ . Let  $\eta > 0$  be from Claim G.5 using  $\varepsilon = \frac{\varepsilon}{2}$ . Let  $\delta > 0$  be from  
1060 Lemma G.3 using  $\varepsilon = \min\{\frac{\varepsilon}{2}, \eta\}$ . Let  $q' = \text{proj}(\hat{q}, Q(s, \theta)) \in Q(s, \theta)$ . From Lemma G.3,  
1061  $\|\hat{q}_t - q'\|_2 \leq \eta$ , implying  $\|q'\|_2 \leq \|\hat{q}_t\|_2 + \eta \leq \|q_*\|_2 + \eta$ . Therefore,  $q' \in R(\eta)$ . Claim G.5  
1062 implies  $\|q' - q_*\|_2 \leq \frac{\varepsilon}{2}$ . Let  $\delta > 0$  correspond to  $\frac{\varepsilon}{2}$  from Lemma G.3, so that  $\|\hat{q}_t - q'\|_2 \leq \frac{\varepsilon}{2}$ . Then,

$$\|\hat{q}_t - q_*\|_2 \leq \|\hat{q}_t - q'\|_2 + \|q' - q_*\|_2 \leq \varepsilon.$$

1063 An analogous argument shows the same result in the case that  $\|q_*\|_2 \leq \|\hat{q}_t\|_2$  using Lemma G.4.

1064 □

#### 1065 G.4.1 Proof of Lemmas

1066 We first state an additional lemma:

1067 **Lemma G.6.** For any  $\varepsilon > 0$  there exists a  $\delta > 0$  such that if  $H_t(\delta)$ , then for any feasible solution  $q$ ,  
1068  $|f(q) - \hat{f}(q)| < \varepsilon$ .

1069 *Proof of Lemma G.6.* Let  $q$  be a feasible solution. Let  $S^g(q, \tilde{\theta}) =$   
1070  $\sum_{a \in \mathcal{A}^g} \tilde{\Delta}^g(a) (\tilde{J}^g(a) - q^g(a) \tilde{J}(a))$ , where  $\tilde{\Delta}^g(a)$ ,  $\tilde{J}^g(a)$ , and  $\tilde{J}(a)$  are computed with  
1071  $\tilde{\theta}$ .

1072 For each  $g$ , let  $\varepsilon_g > 0$  be such that if  $|\tilde{s}^g - s_*^g| \leq \varepsilon_g$ , then  $|\log s_*^g - \log \tilde{s}^g| \leq \frac{\varepsilon}{G}$ .  $\Delta^g(a)$ ,  $J^g(a)$ , and  
1073  $J(a)$  are all differentiable functions of  $\theta$  with finite derivatives around  $\theta_*$ . Then, it is possible to find  
1074  $\delta_g > 0$  such that if  $H_t(\delta_g)$ ,  $|\hat{\Delta}^g(a) (\hat{J}^g(a) - q^g(a) \hat{J}(a)) - \Delta^g(a) (J^g(a) - q^g(a) J(a))| \leq \frac{\varepsilon_g}{|\mathcal{A}|}$ .  
1075 Summing over actions,  $|S^g(q, \hat{\theta}_t) - S^g(q, \hat{\theta})| \leq \varepsilon_g$ . Then, if  $H_t(\delta_g)$ ,  $|\log S^g(q, \hat{\theta}) - \log S^g(q, \theta)| \leq$   
1076  $\frac{\varepsilon}{G}$ . Take  $\delta = \min_{g \in \mathcal{G}} \delta_g$ . If  $H_t(\delta)$  is true,  $|f(q) - \hat{f}(q)| < \varepsilon$ . □

1077 *Proof of Lemma G.2.* Let  $\varepsilon > 0$ . Let  $S_\varepsilon = \{s : |s^g - s_*^g| \leq \varepsilon \ \forall g\}$  be the set around  $s_*$  of interest.  
1078 Our goal is to show that  $f_s(\hat{s}) \in S_\varepsilon$ . Let  $f_{\text{bd}} = \max\{f(s) : s \in \text{bd}(S_\varepsilon)\} < f^*$  be the largest  $f$  on  
1079 the boundary of  $S_\varepsilon$ . Then, if  $f_s(s) > f_{\text{bd}}$ , it must be that  $s \in S_\varepsilon$ . (Since the entire line between  
1080  $s$  and  $s_*$  must have a value of  $f_s$  that is higher than  $f_s(s)$  due to concavity, and it must cross the

1081 boundary.) Therefore, we need to show  $f_s(\hat{s}_t) > f_{\text{bd}}$ . Let  $\hat{q}_t$  be the corresponding solution to  $\hat{s}_t$ .  
 1082 Then,  $f_s(\hat{s}_t) = \hat{f}_t(\hat{q}_t)$ . Let  $\delta > 0$  as in Lemma G.6 with  $\varepsilon = f^* - f_{\text{bd}}$ . Then, if  $H_t(\delta)$  is true,

$$f_s(\hat{s}_t) = \hat{f}_t(\hat{q}_t) \geq \hat{f}_t(q_*) \geq f(q_*) - (f^* - f_{\text{bd}}) = f_{\text{bd}},$$

1083 where the second inequality follows from Lemma G.6.

1084 □

1085 *Proof of Lemma G.3.* Let  $\varepsilon > 0$ . Let  $n$  be the dimension of  $q$ . We will make use of the following  
 1086 closed form formula for the projection onto a linear subspace:

1087 **Fact G.7.** Let  $P = \{x : Ax = b\}$ . The orthogonal projection of  $z$  onto  $P$  is  $\text{proj}(z, P) =$   
 1088  $z - A^\top(AA^\top)^{-1}(Az - b)$ .

1089 Let  $Q = Q(s, \tilde{\theta})$ , and let  $A, b$  be the corresponding parameters of the linear constraints; i.e.  $Q = \{x :$   
 1090  $Ax = b, x \geq 0\}$ . Similarly, let  $\hat{Q} = Q(\hat{s}_t, \hat{\theta}_t)$ , and let  $\hat{A}, \hat{b}$  be defined similarly. Note that Fact G.7  
 1091 only works with equality constraints.

1092 We define a distance between two linear polytopes. We use the notation  $P(D, f) = \{x : Dx = f\}$ .  
 1093 Then,  $Q = P(A, b)$ ,  $\hat{Q} = P(\hat{A}, \hat{b})$ .

1094 **Definition G.8.** For two polytopes  $P(A, b)$  and  $P(A', b')$ , the distance is defined as  
 1095  $d(P(A, b), P(A', b')) = \max\{\|A - A'\|_2, \|b - b'\|_2\}$ .

1096 Note that for every  $\alpha > 0$ , there exists  $\delta > 0$  such that  $H_t(\delta)$  implies  $d(Q, \hat{Q}) \leq \alpha$  using Lemma G.2.  
 1097 For any  $\mathcal{I} \in 2^{[n]}$ , let  $P_{\mathcal{I}} = P(A_{\mathcal{I}}, b_{\mathcal{I}}) = \{x : Ax = b, x_i = 0 \forall i \in \mathcal{I}\}$ .

1098 **Claim G.9.** *There exists a constant  $C \geq 1$  such that for any  $\mathcal{I} \in 2^{[n]}$  and any  $\tilde{A}, \tilde{b}$  of same dimensions*  
 1099 *as  $A_{\mathcal{I}}, b_{\mathcal{I}}$ , if  $\tilde{q} \in P(\tilde{A}, \tilde{b})$  with  $\tilde{q} \leq 1$  (for all elements), then  $\|\tilde{q} - \text{proj}(\tilde{q}, P_{\mathcal{I}})\|_2 \leq Cd(P_{\mathcal{I}}, P(\tilde{A}, \tilde{b}))$ .*

1100 *Proof of Claim G.9.* From Fact G.7, we have  $\|\tilde{q} - \text{proj}(\tilde{q}, P_{\mathcal{I}})\|_2 = \|A_{\mathcal{I}}^\top(A_{\mathcal{I}}A_{\mathcal{I}}^\top)^{-1}(A_{\mathcal{I}}\tilde{q} - b_{\mathcal{I}})\|_2$ .  
 1101 Since  $\tilde{q} \in P(\tilde{A}, \tilde{b})$ ,  $\tilde{A}\tilde{q} = \tilde{b}$ . Let  $\lambda = \max_{\mathcal{I}} \|A_{\mathcal{I}}^\top(A_{\mathcal{I}}A_{\mathcal{I}}^\top)^{-1}\|_2$  and let  $d = d(P_{\mathcal{I}}, P(\tilde{A}, \tilde{b}))$ .  
 1102 Therefore,

$$\begin{aligned} \|\tilde{q} - \text{proj}(\tilde{q}, P_{\mathcal{I}})\|_2 &\leq \lambda \|(A_{\mathcal{I}} - \tilde{A})\tilde{q} + (\tilde{b} - b_{\mathcal{I}})\|_2 \\ &\leq \lambda \left( \|A_{\mathcal{I}} - \tilde{A}\|_2 \|\tilde{q}\|_2 + \|\tilde{b} - b_{\mathcal{I}}\|_2 \right) \\ &\leq 2\lambda nd. \end{aligned}$$

1103 Therefore,  $C = 2\lambda n$ . □

1104 We now describe an iterative process to prove this result.

1105 Let  $Q^0 = \{q : Aq = b\}$  ( $Q$  without the non-negativity constraint), and same with  $\hat{Q}^0 = \{q : \hat{A}q = \hat{b}\}$ .  
 1106 Let  $\alpha_0 = d(Q^0, \hat{Q}^0)$ . Let  $\tilde{q}^0 = \text{proj}(\hat{q}, Q^0)$ . By Claim G.9,  $\|\hat{q} - \tilde{q}^0\|_2 \leq C\alpha_0$ . If  $\tilde{q}^0 \geq 0$ , then  
 1107 STOP here.

1108 Otherwise, find an index  $i$  which violates the non-negativity constraint using the following method:

- 1109 • Let  $q \in Q$  be an arbitrary feasible point ( $q \geq 0$ ).
- 1110 • From the point  $\tilde{q}^0$ , move along the direction towards  $q$ . Let  $p^0$  be the first point on this line  
 1111 where  $p^0$  is non-negative.
- 1112 • Since  $Q$  is simply  $Q^0$  with non-negativity constraints and both sets are convex,  $p^0 \in Q$ .
- 1113 • Let  $i$  be an index where  $\tilde{q}_i^0 < 0$  and  $p_i^0 = 0$  (the last index to become non-negative).

1114 Since  $\hat{q} \geq 0$ , it must be that  $\hat{q}_i \leq C\alpha_0$  since  $\|\hat{q} - \tilde{q}^0\|_2 \leq C\alpha_0$ .

1115 Let  $Q^1$  be the same polytope as  $Q^0$ , but with the additional constraint that  $q_i = 0$  — call this constraint  
 1116  $C$ . Let  $A^1, b^1$  be the corresponding equality constraints for  $Q^1$ . Let  $\hat{Q}^1$  be the same polytope as  $\hat{Q}$ , but  
 1117 with the additional equality constraint that  $q_i = \hat{q}_i$  — call this constraint  $\hat{C}$ . Let  $\hat{A}^1, \hat{b}^1$  be the equality  
 1118 constraints for  $\hat{Q}^1$ . Note that the only difference between constraints  $C$  and  $\hat{C}$  is the right hand side,

1119 which differ by at most  $C\alpha_0$ . Therefore,  $d(Q^1, \hat{Q}^1) \leq d(Q^0, \hat{Q}^0) + C\alpha_0 \leq 2C\alpha_0$ . Clearly,  $\hat{q} \in \hat{Q}^1$ .  
 1120 Let  $\tilde{q}^1 = \text{proj}(\hat{q}, Q^1)$ . Applying Claim G.9 again, we have  $\|\hat{q} - \tilde{q}^1\|_2 \leq C(2C\alpha_0) = 2C^2\alpha_0$ . If  
 1121  $\tilde{q}^1 \geq 0$ , then STOP here.

1122 Otherwise, let  $j$  be the index which violates the non-negativity constraint found using the same  
 1123 method as before; except this time, we draw a line between  $\tilde{q}^1$  towards  $p^0 \in Q$ . We let  $p^1$  be the first  
 1124 point where  $p^1 \geq 0$ . Then, we repeat the above process. We define  $Q^2$  to be the same polytope as  $Q^1$ ,  
 1125 with the additional constraint that  $q_j = 0$ .  $\hat{Q}^2$  is defined as  $\hat{Q}^1$  with the additional constraint  $q_j = \hat{q}_j$ .  
 1126 Then,  $\hat{q}_j \leq 2C^2\alpha_0$ . Therefore,  $d(Q^2, \hat{Q}^2) \leq d(Q^1, \hat{Q}^1) + 2C^2\alpha_0 \leq 2C\alpha_0 + 2C^2\alpha_0 \leq 4C^2\alpha_0$ .  
 1127 Applying Claim G.9, we get  $\|\hat{q} - \tilde{q}^2\|_2 \leq C(4C^2\alpha_0) = 4C^3\alpha_0$ . If  $\tilde{q}^2 \geq 0$ , then STOP here.

1128 **After stopping:** If this process stopped at iteration  $m$ , then  $\tilde{q}^m \in Q$  and  $\|\hat{q} - \tilde{q}^m\|_2 \leq 2^m C^{m-1} \alpha_0$ .  
 1129 It must be that  $m \leq n$ . If  $\alpha_0 = \frac{\varepsilon}{2^n C^{n-1}}$ , then  $\|\hat{q} - \tilde{q}^m\|_2 \leq \varepsilon$ . Then,  $\|\text{proj}(\hat{q}, Q) - \hat{q}\|_2 \leq \varepsilon$ . Let  
 1130  $\delta > 0$  such that  $H_t(\delta)$  implies  $d(Q, \hat{Q}) \leq \alpha_0$ .  $\square$

1131 *Proof of Lemma G.4.* This proof follows essentially the same steps as the proof of Lemma G.3 by  
 1132 swapping  $Q$  and  $\hat{Q}$ . The main difference is that we are projecting  $q$  onto  $Q(\hat{s}_t, \hat{\theta}_t)$ , but this must hold  
 1133 for all possible values of  $\hat{s}_t, \hat{\theta}_t$  (using a single  $\delta$ ). Due to this, the only thing we have to change from  
 1134 the proof of Lemma G.3 is Claim G.9. We must show that there exists a constant  $C$  where Claim G.9  
 1135 is satisfied for all possible values of  $\hat{s}_t, \hat{\theta}_t$ . The only place where  $C$  relies on a property of the polytope  
 1136  $P_{\mathcal{I}}$  is in choosing  $\lambda$ . Therefore our goal is to uniformly upper bound  $\max_{\mathcal{I}} \|\hat{A}_{\mathcal{I}}^{\top} (\hat{A}_{\mathcal{I}} \hat{A}_{\mathcal{I}}^{\top})^{-1}\|_2$  for  
 1137 all possible  $\hat{A}_{\mathcal{I}}$  that can be induced by all possible  $\hat{s}_t, \hat{\theta}_t$ .

1138 Note that since we assume that  $H_t(\delta_0)$  holds, the possible matrices  $\hat{A}$  lie in a compact space (since  
 1139 every element of the matrix  $\hat{A}$  can be at most  $\delta_0$  apart). Since  $\|A^{\top} (AA^{\top})^{-1}\|_2$  is a continuous  
 1140 function of the elements of the matrix  $A$ ,  $\lambda_1 = \max_{\hat{A}} \|\hat{A}^{\top} (\hat{A} \hat{A}^{\top})^{-1}\|_2$  exists. Moreover, for any  
 1141  $\mathcal{I}$ ,  $\|\hat{A}_{\mathcal{I}}^{\top} (\hat{A}_{\mathcal{I}} \hat{A}_{\mathcal{I}}^{\top})^{-1}\|_2 \leq C(n) \|\hat{A}^{\top} (\hat{A} \hat{A}^{\top})^{-1}\|_2$  for a constant  $C(n)$ . Therefore, by replacing  $\lambda$  with  
 1142  $\lambda_1 C(n)$ , Claim G.9 holds.  $\square$
