# Supplementary material
Source: ML conference proceedings conference paper supplement (https://openreview.net/forum?id=GEKTIKvslP)
Supplement: supplementary_material [file attachment]

## A Deferred Descriptions

### A.1 Negative Externality Example from [12]

[12] provide an example of an instance where there exists a sub-population that is better off when UCB is run on that sub-population alone, compared to running UCB on the entire population. The example they provide depends on the total time horizon  $T$ . We claim that this does not occur when you fix an instance and consider asymptotic log-scaled regret,  $\lim_{T \rightarrow \infty} \frac{R_T}{\log T}$ .

Fix any time  $T_0$ , and consider the two-armed instance according to  $T = T_0$  from Definition 1 of [12]. The population consists of three buckets that depend on their starting location: A, B, and C. The sub-population consisting of B and C is dubbed the “minority”, while A is the “majority”. Note that only B has access to both arms and hence it is the only bucket that can ever incur regret. Group B pulls the arm that has a higher UCB, defined as  $\hat{\theta}_t(a) + \sqrt{\frac{\alpha \log T_0}{N_t(a)}}$  for some tuning parameter  $\alpha > 0$ .

We first summarize informally how the negative externality arises. Because arms 1 and 2 are so close together, even after  $O(T_0)$  time steps, which arm has a higher UCB is not dominated by the difference between their empirical means, but it is dominated the second term of the UCB:  $\sqrt{\frac{\alpha \log T_0}{N_t(a)}}$ , which is just a function of the number of pulls  $N_t(a)$ . That is, group B essentially ends up pulling the arm that has fewer pulls. Therefore, when only the minority exists, since C only pulls arm 2, arm 1 ends up having a higher UCB, and hence B ends up always pulling arm 1. However, if the majority group exists, arm 1 always has more pulls than arm 2 since there are more people from A than C. Then, B ends up essentially always pulling arm 2. If arm 2 is the arm that has a lower true reward than arm 1, then regret is higher when the majority group exists — therefore, the existence of the majority can have a “negative externality” on the minority.

However, if we fix this instance and let  $T \rightarrow \infty$ , then no matter which arms is better, from Theorem C.1, the total log-scaled regret is 0 from running KL-UCB. Moreover, when the majority does not exist, then the minority incurs non-zero log-scaled regret when  $\theta_1 < \theta_2$ . Therefore, the presence of the majority can only help the minority. Now, as explained in [12], it is true that the presence of the majority can negatively affect the minority in the early time steps (i.e.  $t < T_0$ ). In the asymptotic regime, such a negative externality corresponds to adding  $o(\log T)$  regret, which is deemed insignificant in our setting.

### A.2 Optimal Allocation Matching (OAM) Policy

We describe the OAM algorithm from [22].

**Preliminaries:** Let  $G_t = \sum_{s=1}^{t-1} A_s A_s^\top$  and let  $\hat{\theta}_t = G_t^{-1} \sum_{s=1}^{t-1} A_s Y_s$  be the least squares estimate of  $\theta$  at time  $t$ . Let  $\hat{\Delta}_t^m(a) = \max_{a' \in \mathcal{A}(m)} \langle a' - a, \hat{\theta}_t \rangle$  be the corresponding estimate of  $\Delta^m(a)$ . Let  $\hat{\Delta}_t^{\min} = \min_{m \in [M]} \min_{a \in \mathcal{A}(m), \hat{\Delta}_t(m, a) > 0} \hat{\Delta}_t(m, a)$  be the smallest nonzero instantaneous regret. Let

$$f_{T, \delta} = 2 \left( 1 + \frac{1}{\log T} \right) \log \left( \frac{1}{\delta} \right) + cd \log(d \log T),$$

where  $c$  is an absolute constant. Let  $f_T = f_{T, 1/T}$ .

Define the following optimization problem that takes  $\tilde{\Delta}(m, a)$  as input:

$$(K) \quad \begin{aligned} \min \quad & \sum_{m \in \mathcal{M}} \sum_{a \in \mathcal{A}(m)} Q(m, a) \tilde{\Delta}(m, a) \\ \text{s.t.} \quad & \|a\|_{H_T^{-1}}^2 \leq \frac{\tilde{\Delta}(m, a)^2}{f_T} \quad \forall m \in \mathcal{M}, a \in \mathcal{A}(m) \\ & Q(m, a) \geq 0 \quad \forall m \in \mathcal{M}, a \in \mathcal{A}, \end{aligned}$$

where  $H_T = \sum_{m \in \mathcal{M}} \sum_{a \in \mathcal{A}(m)} Q(m, a) a a^\top$  is invertible. Let  $(\hat{Q}_t(m, a))_{m \in \mathcal{M}, a \in \mathcal{A}}$  be the solution to (K) using  $\tilde{\Delta} = \hat{\Delta}_t$ .

506 **Algorithm:** We are now ready to state the algorithm. At each time step  $t$ , observe context  $m_t$  and  
 507 do the following. First, check whether

$$(10) \quad \|a\|_{G_t^{-1}}^2 \leq \frac{\hat{\Delta}_t(m, a)^2}{f_T} \quad \forall a \in \mathcal{A}(m_t).$$

508 If (10) is satisfied, we exploit; otherwise, we explore.

509 **Exploit:** Pull the greedy arm:  $\operatorname{argmax}_{a \in \mathcal{A}(m_t)} \langle a, \hat{\theta}_t \rangle$ .

510 **Explore:** Let  $s(t)$  be the total number of exploration rounds so far. Solve the empirical optimization  
 511 problem  $(K)$  to get solution  $\hat{Q}_t(m, a)$ .

- 512 1. Check whether  $N_t^{m_t}(a) \geq \min(\hat{Q}_t(m_t, a), f_T/(\hat{\Delta}_t^{\min})^2)$  holds for all available arms  $a \in$   
 513  $\mathcal{A}(m_t)$ . If so, pull the UCB arm  $A_t = \operatorname{argmax}_{a \in \mathcal{A}(m_t)} \langle a, \hat{\theta}_t \rangle + \sqrt{f_T, 1/s(t)^2} \|a\|_{G_t^{-1}}$ .
- 514 2. Check whether there exists an available arm  $a \in \mathcal{A}(m_t)$  such that  $N_t(a) \leq \varepsilon_t s(t)$ , where  
 515  $\varepsilon_t = 1/\log \log t$ . If there is, then pull  $A_t = \operatorname{argmin}_{a \in \mathcal{A}(m_t)} N_t(a)$ .
- 516 3. If the above two criteria are not true, then pull  $A_t =$   
 517  $\operatorname{argmin}_{a \in \mathcal{A}(m_t)} \frac{N_t(a)}{\min(\hat{Q}_t(m_t, a), f_T/(\hat{\Delta}_t^{\min})^2)}$ .

### 518 A.3 Warfarin Experiment Details

519 We use a publicly available dataset for warfarin dosing that was collected by the Pharmacogenomics  
 520 Knowledge Base (PharmGKB [30]), which is under a Creative Commons license<sup>1</sup>. The dataset  
 521 contains 5700 patients who were treated with warfarin from 21 research groups over 9 countries.  
 522 Consent for all patients was obtained previously from each center, and no personally identifiable  
 523 information was used. The dataset contains the optimal dose of warfarin for each patient, which  
 524 was found by doctors through trial and error. It also includes many other covariates for each patient  
 525 including demographics, clinical features, and genetic information.

526 **Groups:** We group the patients either by race or age. There were three distinct races in the dataset,  
 527 which we label as A, B, and C. For age, we split the patients into two age groups, where the threshold  
 528 age was 70.

529 **Contexts:** The OAM and PF-OAM policies assume a finite number of possible feature vectors, and  
 530 the optimization problem  $(L(\theta))$  scales with this number. Therefore, for tractability, we only use  
 531 five features for the contexts of the patients, where we discretize each feature into two bins. We use  
 532 the five features that are most correlated with the optimal warfarin dosage, and we use the empirical  
 533 median of each feature to discretize them. The five features that we use are: age, weight, whether  
 534 the patient was taking another drug (amiodarone), and two binary features capturing whether the  
 535 patient has a particular genetic variant of genes Cyp2C9 and VKORC1, two genes that are known  
 536 to affect warfarin dosage [32]. Out of  $2^5 = 32$  different possible feature vectors, there were 21 that  
 537 were present in the data.

538 **Rewards:** We bin the optimal dosage levels into three arms as was done in [7]: Low (under 3  
 539 mg/day), Medium (3-7 mg/day), and High (over 7 mg/day). To ensure that the model is correctly  
 540 specified, for each arm, we train a linear regression model using the entire dataset from the five  
 541 contexts to the binary reward on whether the optimal dosage for that patient belongs in that bin. Let  
 542  $\theta_a \in \mathbb{R}^6$  be the learned linear regression parameter for each arm ( $d = 6$  to include the intercept).<sup>2</sup>  
 543 To model this as grouped linear contextual bandits as described in Section 5, we let  $d = 18$  and let  
 544  $\theta = (\theta_1, \theta_2, \theta_3) \in \mathbb{R}^d$ . When a patient with covariates  $X \in \mathbb{R}^6$  arrives, the actions available are  
 545  $\{(X, \mathbf{0}, \mathbf{0}), (\mathbf{0}, X, \mathbf{0}), (\mathbf{0}, \mathbf{0}, X)\}$ , and their expected reward from arm  $a$  is  $\langle X, \theta_a \rangle$  for  $a \in \{1, 2, 3\}$ .

546 **Algorithms:** We assume a patient is drawn i.i.d. from the dataset at each time step, and we compute  
 547 the asymptotic group regret of the OAM policy ('Regret optimal') and the fair extension ('Fair') as  
 548 described in Section 5:

<sup>1</sup><https://creativecommons.org/licenses/by-sa/4.0/>

<sup>2</sup>The linear regression step is done solely to remove model misspecification. The purpose of this study is not to show that the linear contextual bandit is a good fit for this dataset — this was already demonstrated in [7]. rather, the purpose is to demonstrate how incorporating fairness changes the outcome from a policy that does not take fairness into account on a bandit instance that approximates a real-world setting. rather, the purpose is to

- *Regret optimal:* Using the true values  $\theta$ , we solve  $(L(\theta))$  and obtain solution  $(Q(m, a))_{m \in [M], a \in \mathcal{A}}$ . Then, the total (log-scaled) regret incurred by context  $m$  is  $\sum_{a \in \mathcal{A}} \Delta(m, a) Q(m, a)$ . Since we assume the group arrivals are i.i.d., for each context, we allocate the regret to groups in proportion to the group's frequency. That is, for each  $m$ , let  $(w^g(m))_{g \in \mathcal{G}}$ ,  $\sum_{g \in \mathcal{G}} w^g(m) = 1$  be the empirical distribution of groups among patients with context  $m$ . Then, the total regret assigned to group  $g$  is  $\sum_{m \in [M]} w^g(m) \sum_{a \in \mathcal{A}} \Delta(m, a) Q(m, a)$ .
- *Fair:* Using the true values  $\Delta$ , we solve  $(L^{\text{fair}}(\theta))$  and obtain solution  $(Q^g(m, a))_{g \in \mathcal{G}, m \in [M], a \in \mathcal{A}}$ . The total regret assigned to group  $g$  is  $\sum_{m \in [M]} \sum_{a \in \mathcal{A}} \Delta(m, a) Q^g(m, a)$ .

All experiments were run on a Macbook Pro with a 2.5 GHz Intel Core i7 processor.

## B Proof Preliminaries

### B.1 Notation

For all of the subsequent proofs, we assume that an instance  $\mathcal{I}$  is *fixed*. We often use big-O notation, which is with respect to  $T \rightarrow \infty$ , unless otherwise specified. The big-O hides constants that may depend on any other parameter other than  $T$ , including the instance  $\mathcal{I}$ . In general, when we introduce a *constant*, it may depend on any other parameters other than  $T$ . We are usually not concerned with the values of the constants as we are concerned with asymptotic results (though we do concern ourselves with constants in front of the leading term, usually  $\log T$ ). We sometimes re-use letters like  $c$  for constants but they do not refer to the same value.

The UCB of an arm is defined as:

$$(11) \quad \text{UCB}_t(a) = \max\{q : N_t(a) \text{KL}(\hat{\theta}_t(a), q) \leq \log t + 3 \log \log t\}.$$

Let  $\text{Pull}_t(a)$  be the indicator for arm  $a$  being pulled at time  $t$ , and let  $\text{Pull}_t^g(a)$  be the indicator for when arm  $a$  is pulled by group  $g$ . We define the class of log-consistent policies:

**Definition B.1.** A policy  $\pi$  for the grouped bandit problem is *log-consistent* if for any instance  $(\theta, G, (p_g)_{g \in G}, (\mathcal{A}_g)_{g \in G})$ , for any group  $g$ ,

$$(12) \quad \mathbb{E} \left[ \sum_{a \in \mathcal{A}_{\text{sub}}(g)} N_T^g(a) \right] = O(\log T).$$

That is, the expected number of times that group  $g$  pulled a suboptimal arm by time  $t$  is logarithmic in the number of arrivals of  $g$ .

### B.2 Commonly Used Lemmas

We state a few lemmas that are used several times for both Theorem C.1 and Theorem 4.1. These lemmas do not depend on the policy that is used. The first result shows that the number of times that an arm's UCB is smaller than its true mean is small.

**Lemma B.2.** Let  $\Lambda_t = \{\text{UCB}_t(a) \geq \theta(a) \forall a \in \mathcal{A}\}$  be the event that UCB for every arm is valid at time  $t$ .

$$\sum_{t=1}^T \Pr(\bar{\Lambda}_t) = O(\log \log T).$$

*Proof.* For a fix arm  $a$ ,  $\sum_{t=1}^T \Pr(\text{UCB}_t(a) < \theta(a)) = O(\log \log T)$  follows from Theorem 10 of [28], plugging in  $\delta = \log t + 3 \log \log t$  as is done in the proof of Theorem 2 of [28]. The result follows from a union bound over all actions  $a \in \mathcal{A}$ .  $\square$

The second lemma states a relationship between the radius of the UCB of an arm and the number of pulls of the arm.

**Lemma B.3.** Let  $0 < \alpha < \beta < 1$ . There exists a constant  $c > 0$  such that if  $\hat{\theta}_t(a) \leq \alpha$  and  $\text{UCB}_t(a) \geq \beta$ , then  $N_t(a) < c \log t$ .

589 *Proof.* Suppose  $\hat{\theta}_t(a) \leq \alpha$  and  $\text{UCB}_t(a) \geq \beta$ . Then,  $\text{KL}(\hat{\theta}_t(a), \text{UCB}_t(a)) \geq \text{KL}(\alpha, \beta)$ . Let  
 590  $c = \frac{4}{\text{KL}(\alpha, \beta)}$ . By definition of the UCB (11),  $N_t(a) \leq \frac{\log t + 3 \log \log t}{\text{KL}(\hat{\theta}_t(a), \text{UCB}_t(a))} \leq c \log t$ .  $\square$

591 This result essentially states that if the radius of the UCB of an arm is larger than a constant, then the  
 592 number of pulls of the arm is at most  $O(\log t)$ ; this result follows simply from the definition of the  
 593 UCB (11). The next result states that if an arm  $a$  is pulled, then its empirical mean will be close to its  
 594 true mean.

595 **Lemma B.4.** For any group  $g$  and arm  $a \in \mathcal{A}^g$ , if  $L < \theta(a) < U$ ,

$$\sum_{t=1}^T \Pr(\text{Pull}_t(a), \hat{\theta}_t(a) \notin [L, U]) = O(1).$$

596 where big- $O$  hides constants that may depend on the instance and  $L, U$ .

597 *Proof.* Let  $\hat{\theta}^n(a)$  be the empirical mean after  $n$  pulls of arm  $a$ . Let  $E_{t,n}$  be the event that the number  
 598 of times arm 1 has been pulled before time  $t$  is exactly  $n$ .

$$\begin{aligned} & \sum_{t=1}^T \Pr(\text{Pull}_t(a), \hat{\theta}_t(a) \notin [L, U]) \\ &= \sum_{t=1}^T \sum_{n=1}^T \Pr(\text{Pull}_t(a), \hat{\theta}^n(a) \notin [L, U], E_{t,n}) \\ &= \sum_{n=1}^T \sum_{t=1}^T \Pr(\hat{\theta}^n(a) \notin [L, U] \mid \text{Pull}_t(a), E_{t,n}) \Pr(\text{Pull}_t(a), E_{t,n}) \end{aligned}$$

599 If  $F_{t,n} = \{\text{Pull}_t(a), E_{t,n}\}$ , then for any  $n$ , the events  $F_{1,n}, \dots, F_{T,n}$  are disjoint. Then, by the law  
 600 of total probability,  $\Pr(\hat{\theta}^n(a) \notin [L, U]) \geq \sum_{t=1}^T \Pr(\hat{\theta}^n(a) \notin [L, U] \mid F_{t,n}) \Pr(F_{t,n})$ . Therefore,

$$\sum_{t=1}^T \Pr(\text{Pull}_t(a), \hat{\theta}_t(a) \notin [L, U]) \leq \sum_{n=1}^T \Pr(\hat{\theta}^n(a) \notin [L, U]) \leq \sum_{n=1}^T \exp(-\alpha n).$$

601 for some  $\alpha > 0$  since the rewards of arm  $a$  are Bernoulli. Therefore,  $\sum_{t=1}^T \Pr(\text{Pull}_t(a), \hat{\theta}_t(a) \notin$   
 602  $[L, U]) = O(1)$ .  $\square$

## 603 C Proof that KL-UCB is Regret Optimal

604 In this section, we prove that the KL-UCB policy is regret-optimal. At each time step,  $\pi^{\text{KL-UCB}}$   
 605 chooses the arm with the highest UCB, defined as (11), out of all arms available.

606 **Theorem C.1.** For all instances  $\mathcal{I}$  of the grouped  $K$ -armed bandit,

$$(13) \quad \liminf_{T \rightarrow \infty} \frac{R_T(\pi^{\text{KL-UCB}}, \mathcal{I})}{\log T} \leq \sum_{a \in \mathcal{A}_{\text{sub}}} \Delta^{\Gamma(a)}(a) J(a).$$

607 The first step of the proof is to show that the number of pulls of a suboptimal arm is optimal:

608 **Proposition C.2.** Let  $a \in \mathcal{A}_{\text{sub}}$  be a suboptimal arm. KL-UCB satisfies

$$\limsup_{T \rightarrow \infty} \frac{\mathbb{E}[N_T(a)]}{\log T} \leq J(a).$$

609 This result can be shown using the existing analysis of KL-UCB from [28]. The next step is to  
 610 analyze how these pulls are distributed across groups. In particular, we need to show that a group  
 611 never pulls a suboptimal arm  $a$  if  $g \notin \Gamma(a)$ . This is the result of the next theorem:

612 **Proposition C.3.** Let  $a \in \mathcal{A}$ . Let  $g \in G_a$ ,  $g \notin \Gamma(a)$  be a group that has access to the arm but is not  
 613 the group that has the smallest optimal out of  $G_a$ . Then, KL-UCB satisfies

$$\mathbb{E}[N_T^g(a)] = O(\log \log T),$$

614 where the big- $O$  hides constants that depend on the instance.

615 This result implies that for any arm  $a$ , the regret incurred by group  $g \notin \Gamma(a)$  pulling the arm  
 616 is  $o(\log T)$ , and is equal to 0 when scaled by  $\log T$ . Theorem C.1 then follows from combining  
 617 Proposition C.2 and Proposition C.3.

618 In this section, we prove Proposition C.3. Let  $a \in \mathcal{A}$  and let  $A \in \Gamma(a)$  be a group that has access to  
 619 that arm with the smallest OPT. Let group  $B \notin \Gamma(a)$  be another group that has access to arm  $a$ . Let  
 620  $\theta^A, \theta^B$  be the optimal arms for group A and B respectively. We use  $\theta^A, \theta^B$  to refer to both the arm  
 621 and the arm means. Our goal is to show  $\mathbb{E}[N_T^B(a)] = O(\log \log T)$ .

$$\begin{aligned} \mathbb{E}[N_T^B(a)] &= \sum_{t=1}^T \Pr(\text{Pull}_t^B(a)) \\ &= \sum_{t=1}^T \Pr(\text{Pull}_t^B(a), \text{UCB}_t(\theta^B) \geq \theta^B) + \sum_{t=1}^T \Pr(\text{Pull}_t^B(a), \text{UCB}_t(\theta^B) < \theta^B). \end{aligned}$$

622 The second sum can be bounded by Lemma B.2, since  $\sum_{t=1}^T \Pr(\text{Pull}_t^B(a), \text{UCB}_t(\theta^B) < \theta^B) \leq$   
 623  $\sum_{t=1}^T \Pr(\bar{\Lambda}_t) = O(\log \log T)$ . Therefore, our goal is to show

$$(14) \quad \sum_{t=1}^T \Pr(\text{Pull}_t^B(a), \text{UCB}_t(\theta^B) \geq \theta^B) = O(\log \log T).$$

624 We state a slightly more general result that implies (14).

625 **Lemma C.4.** *Suppose we run any log-consistent policy  $\pi$ . Let  $r > 0$  be fixed. For any  $a \in \mathcal{A}$ ,*

$$\sum_{t=1}^T \Pr(\text{Pull}_t(a), \text{UCB}_t(a) \geq \text{OPT}(\Gamma(a)) + r) = O(\log \log T),$$

626 *where the constant in the big-O may depend on the instance and  $r$ .*

627 The rest of this section proves Lemma C.4.

### 628 C.1 Probabilistic Lower Bound of $N_t(a)$ for Grouped Bandit

629 One of the main tools used in the proof of Lemma C.4 is a high probability lower bound on the  
 630 number of pulls of a suboptimal arm. Let  $W_t(g)$  be the number of arrivals of group  $g$  by time  $t$ .  
 631 Let  $R_t^g = \{W_t(g) \geq \frac{p_g t}{2}\}$  be the event that the number of arrivals of group  $g$  is at least half of the  
 632 expected value. We condition on the event  $R_t^g$  to ensure that a group has arrived a sufficient number  
 633 of times.

634 **Proposition C.5.** *Let  $g$  be a group, and let  $a \in \mathcal{A}_{\text{sub}}^g$  be a suboptimal arm for group  $g$ . Fix  $\varepsilon \in (0, 1)$ .  
 635 Suppose we run a log-consistent policy as defined in Definition B.1. Then,*

$$\Pr\left(N_t(a) \leq \frac{(1-\varepsilon)\log t}{KL(\theta(a), \text{OPT}(g))} \mid R_t^g\right) = O\left(\frac{1}{\log t}\right),$$

636 *where the big-O notation is with respect to  $t \rightarrow \infty$ .*

637 The proof of this result can be found in Appendix D.3. For an arm  $a \notin \mathcal{A}_{\text{sub}}$ , we have the following  
 638 stronger result:

639 **Proposition C.6.** *Let  $a$  be an arm that is optimal for some group  $g$ . Suppose we run a log-consistent  
 640 policy. Then, for any  $b > 0$ ,*

$$\Pr(N_t(a) \leq b \log t \mid R_t^g) = O\left(\frac{1}{\log t}\right),$$

641 *where the big-O notation is with respect to  $t \rightarrow \infty$  and hide constants that depend on both  $b$  and the  
 642 instance.*

## 643 C.2 Proof of Lemma C.4

644 **Outline:** Let  $A \in \Gamma(a)$  be a group that has the smallest optimal out of all arms with access to  $a$ .  
 645 The main idea of this lemma is that group A does not “allow” the UCB of arm  $a$  to grow as large  
 646 as  $\text{OPT}(A) + r$ , as group A would pull arm  $a$  once the UCB is above  $\text{OPT}(A)$ . Proposition C.5  
 647 implies that  $\text{UCB}_t(a)$  is not larger than  $\text{OPT}(A)$  with high probability. If this occurs at time  $t$ , since  
 648 the radius of the UCB grows slowly (logarithmically), the earliest time that the UCB can grow to  
 649  $\text{OPT}(A) + r$  is  $t^\gamma$ , for some  $\gamma > 1$ . We divide the time steps into epochs, where if epoch  $k$  starts at  
 650 time  $s_k$ , it ends at  $s_k^\gamma$ . This exponential structure gives us  $O(\log \log T)$  epochs in total, and we show  
 651 that the expected number of times that  $\text{UCB}_t(a) > \text{OPT}(A) + r$  during one epoch is  $O(1)$ .

652 **Proof:** We denote by  $\theta_a$  the true mean reward of arm  $a$  and by  $\hat{\theta}_t$  the empirical mean reward of  $a$  at  
 653 the start of time  $t$ . Let  $U = \text{OPT}(\Gamma(a)) + r$ . Let  $A \in \Gamma(a)$ , and let  $\theta^A = \text{OPT}(A)$ . If  $a \notin \mathcal{A}_{\text{sub}}$ ,  
 654 then let  $\theta^A = \text{OPT}(A) + r/2$ . Let  $b > 0$  such that  $\frac{\text{KL}(\theta_a, U)}{\text{KL}(\theta_a, \theta^A)} = 1 + b$ . Define  $\theta_u \in [\theta_a, \theta^A]$  such  
 655 that  $\frac{\text{KL}(\theta_u, U)}{\text{KL}(\theta_u, \theta^A)} = 1 + \frac{b}{2}$ . We have  $\theta_a < \theta_u < \theta^A < U$ . Define  $\gamma \triangleq 1 + \frac{b}{4}$ . Let  $\varepsilon > 0$  such that  
 656  $\frac{1-\varepsilon}{1+\varepsilon} \cdot \frac{\text{KL}(\theta_u, U)}{\text{KL}(\theta_a, \theta^A)} = \gamma$ .

657 By Lemma B.4,  $\sum_{t=1}^T \Pr(\text{Pull}_t(a), \hat{\theta}_t(a) > \theta_u) = O(1)$ . Therefore, we can assume  $\hat{\theta}_t(a) \leq \theta_u$ .  
 658 Denote the event of interest by  $E_t = \{\text{Pull}_t(a), \text{UCB}_t(a) \geq \theta^A + r, \hat{\theta}_t(a) \leq \theta_u\}$ . Our goal is to  
 659 show  $\sum_{t=1}^T \Pr(E_t) = O(\log \log T)$ .

660 Divide the time interval  $T$  into  $K = O(\log \log T)$  epochs. Let epoch  $k$  start at  $s_k \triangleq \lceil 2^{\gamma^k} \rceil$  for  $k \geq 0$ .  
 661 Let  $\mathcal{T}_k = \{s_k, s_k + 1, \dots, s_{k+1} - 1\}$  be the time steps in epoch  $k$ . This epoch structure satisfies the  
 662 following properties:

- 663 1. The total number of epochs is  $O(\log \log T)$ .
- 664 2.  $\frac{\log s_{k+1}}{\log s_k} = \gamma$  for all  $k \geq 0$ .

665 We will treat each epoch separately. Fix an epoch  $k$ . Our goal is to bound  $\mathbb{E} [\sum_{t \in \mathcal{T}_k} \mathbf{1}(E_t)]$ .  
 666 Lemma B.3 implies that there exists a constant  $c > 0$  such that if  $E_t$  occurs, it must be that  
 667  $N_t(a) < c \log t$ . Hence,

$$\sum_{t \in \mathcal{T}_k} \mathbf{1}(E_t) \leq c \log s_{k+1}.$$

668 Define the event  $G_t = \left\{ N_t(a) \geq (1 - \varepsilon) \frac{\log t}{\text{KL}(\mu, \theta^A)} \right\}$ . The following claim says that if  $G_{s_k}$  is true,  
 669 then  $E_t$  never happens during that epoch.

670 **Claim C.7.** Suppose  $G_{s_k}$  is true. Let  $t_0$  be such that if  $t \geq t_0$ ,  $\log \log t \leq \varepsilon \log t$ . Then, if  
 671  $s_k \geq t_0$ ,  $\sum_{t=s_k}^{s_{k+1}-1} \mathbf{1}(E_t) = 0$ .

672 This result follows from the fact that the event  $G_{s_k}$  implies that the radius of the UCB is “small” at  
 673 time  $s_k$ , and the epoch is defined so that the radius will not grow large enough that  $E_t$  can occur  
 674 during epoch  $k$ . Therefore, we have the following:

$$\mathbb{E} \left[ \sum_{t \in \mathcal{T}_k} \mathbf{1}(E_t) \right] = \mathbb{E} \left[ \sum_{t \in \mathcal{T}_k} \mathbf{1}(E_t) \middle| \bar{G}_{s_k} \right] \Pr(\bar{G}_{s_k}) \leq c \log s_{k+1} \Pr(\bar{G}_{s_k}).$$

675 We can bound  $\Pr(\bar{G}_{s_k})$  using the probabilistic lower bound of Proposition C.5.

676 **Claim C.8.**  $\Pr(\bar{G}_{s_k}) \leq O\left(\frac{1}{\log s_k}\right)$ .

677 Then, property 2 of the epoch structure implies  $\mathbb{E} [\sum_{t \in \mathcal{T}_k} \mathbf{1}(E_t)] = O(1)$ . Since the number of  
 678 epochs is  $O(\log \log T)$ ,

$$\mathbb{E} \left[ \sum_{t=1}^T \mathbf{1}(E_t) \right] \leq \sum_{k=1}^K \mathbb{E} \left[ \sum_{t \in \mathcal{T}_k} \mathbf{1}(E_t) \right] = O(\log \log T),$$

679 as desired.

### 680 C.3 Proof of Claims

681 *Proof of Claim C.7.* Let  $t = s_k > t_0$  and let  $t' \geq t$  such that  $E_{t'}$  is true. By definition of KL-UCB,

$$N_{t'}(a) \leq \frac{\log t' + 3 \log t'}{\text{KL}(\hat{\theta}_{t'}, \text{UCB}_{t'}(\theta))}.$$

682 Since  $E_{t'}$  implies  $\text{UCB}_{t'}(a) > \theta^B$  and  $\hat{\theta}_{t'} \leq \theta_u$ , we have  $N_{t'}(a) \leq \frac{\log t' + 3 \log t'}{\text{KL}(\theta_u, \theta^B)}$ . Since  $G_{s_k}$  is true,

683  $N_{t'}(a) \geq (1 - \varepsilon) \frac{\log s_k}{\text{KL}(\theta_a, \theta^A)}$ . Therefore, it must be that

$$\begin{aligned} (1 - \varepsilon) \frac{\log s_k}{\text{KL}(\theta_a, \theta^A)} &\leq \frac{\log t' + 3 \log \log t'}{\text{KL}(\theta_u, \theta^B)} \leq \frac{(1 + \varepsilon) \log t'}{\text{KL}(\theta_u, \theta^B)} \\ \Rightarrow \frac{1 - \varepsilon}{1 + \varepsilon} \cdot \frac{\text{KL}(\theta_u, \theta^B)}{\text{KL}(\theta_a, \theta^A)} \log s_k &\leq \log t' \\ \Rightarrow t' &\geq s_k^\gamma. \end{aligned}$$

684 This implies that  $t'$  is not in epoch  $k$ . □

685 *Proof of Claim C.8.* For group  $g = A$ , Proposition C.5 (or Proposition C.6 if  $a \notin \mathcal{A}_{\text{sub}}$ ) states that

$$\Pr(\bar{G}_{s_k} \mid R_{s_k}^g) = O\left(\frac{1}{\log s_k}\right).$$

686 (We show in Appendix D.1 that KL-UCB is log-consistent.)

687 Now we need to bound  $\Pr(\bar{R}_{s_k}^g) = \Pr(M_{s_k}(A) \leq \frac{p_A s_k}{2})$ . Note that  $M_s(A) = \sum_{t=1}^s Z_t^A$ , where

688  $Z_t^A \stackrel{\text{iid}}{\sim} \text{Bern}(p_A)$ . By Hoeffding's inequality,

$$\Pr\left(M_{s_k}(A) \leq \frac{p_A s_k}{2}\right) < \exp\left(-\frac{1}{2} p_A^2 s_k\right).$$

689 Combining, we have

$$\Pr(\bar{G}_k) \leq \Pr(\bar{R}_k) + \Pr(\bar{G}_k \mid R_k) \leq O\left(\frac{1}{\log s_k}\right).$$

690 □

### 691 D Deferred Proofs for Theorem C.1

692 For any  $\varepsilon > 0$ , let

$$K_\varepsilon^g(x) = \left\lceil \frac{1 + \varepsilon}{\text{KL}(\theta_a, \text{OPT}(g))} (\log x + 3 \log \log x) \right\rceil.$$

693 To show both Proposition C.2 and the fact that KL-UCB is log-consistent, we make use of the  
694 following lemma.

695 **Lemma D.1.** Let  $a \in \mathcal{A}$ . Let  $g \in G_a$  be a group in which  $a$  is suboptimal. For any  $\varepsilon > 0$ ,

$$(15) \quad \mathbb{E} \left[ \sum_{t=1}^T \mathbf{1}(\text{Pull}_t^g(a), N_t(a) \geq K_\varepsilon^g(T)) \right] = O(\log \log T).$$

696 *Proof.* Let  $\varepsilon > 0$ . Recall that  $A_g^*$  is the optimal arm for group  $g$ , and  $\text{OPT}(g)$  is the mean reward of  
697  $A_g^*$ .

$$\begin{aligned} &\mathbb{E} \left[ \sum_{t=1}^T \mathbf{1}(\text{Pull}_t^g(a), N_t(a) \geq K_\varepsilon^g(T)) \right] \\ &= \mathbb{E} \left[ \sum_{t=1}^T \mathbf{1}(\text{Pull}_t^g(a), N_t(a) \geq K_\varepsilon^g(T), \text{UCB}_t(A_g^*) \geq \text{OPT}(g)) \right] + \mathbb{E} \left[ \sum_{t=1}^T \mathbf{1}(\text{Pull}_t^g(a), \text{UCB}_t(A_g^*) < \text{OPT}(g)) \right] \end{aligned}$$

698 The second term is  $O(\log \log T)$  from Lemma B.2. We will show that the first term is  $O(1)$ . Let  
 699  $\hat{\theta}_s(a)$  be the empirical mean of  $a$  after  $s$  pulls. Consider the event  $\{A_t = a, g_t = g, N_t(a) =$   
 700  $s, \text{UCB}_t(A_g^*) \geq \text{OPT}(g)\}$ , where  $s \geq K_n$ . Suppose this is true at time  $t$ . Then, it must be that  
 701  $\text{UCB}_t(a) \geq \text{OPT}(g)$ . For this to happen, by definition of KL-UCB, it must be that

$$(16) \quad s \text{KL}(\hat{\theta}_s(a), \text{OPT}(g)) \leq \log t + 3 \log \log t.$$

702 Since  $s \geq K_\varepsilon^g(T)$  and  $t \leq T$ , we must have

$$(17) \quad \text{KL}(\hat{\theta}_s(a), \text{OPT}(g)) \leq \frac{\log T + 3 \log \log T}{K_\varepsilon^g(T)} = \frac{\text{KL}(\theta_a, \text{OPT}(g))}{1 + \varepsilon}.$$

703 Let  $r > \theta_a$  such that  $\text{KL}(r, \text{OPT}(g)) = \frac{\text{KL}(\theta_a, \text{OPT}(g))}{1 + \varepsilon}$ . Then, for (17) to occur, it must be that  
 704  $\hat{\theta}_s(a) \geq r$ . Then, we have

$$\begin{aligned} & \mathbb{E} \left[ \sum_{t=1}^T \mathbf{1}(\text{Pull}_t^g(a), N_t(a) \geq K_\varepsilon^g(n), \text{UCB}_t(A_g^*) \geq \text{OPT}(g)) \right] \\ &= \mathbb{E} \left[ \sum_{t=1}^T \sum_{s=K_n}^{\infty} \mathbf{1}(\text{Pull}_t^g(a), N_t(a) = s, \text{UCB}_t(A_g^*) \geq \text{OPT}(g)) \right] \\ &\leq \mathbb{E} \left[ \sum_{t=1}^T \sum_{s=K_n}^{\infty} \mathbf{1}(\text{Pull}_t^g(a), N_t(a) = s, \hat{\theta}_s(a) \geq r) \right] \\ &= \mathbb{E} \left[ \sum_{s=K_n}^{\infty} \mathbf{1}(\hat{\theta}_s(a) \geq r) \sum_{t=1}^T \mathbf{1}(\text{Pull}_t^g(a), N_t(a) = s) \right] \\ &\leq \sum_{s=K_n}^{\infty} \Pr(\hat{\theta}_s(a) \geq r). \end{aligned}$$

705 Since  $r > \mu(a)$ , there exists a constant  $C_3 > 0$  that depends on  $\varepsilon$  and  $r$  such that  $\Pr(\mu_s(a) \geq r) \leq$   
 706  $\exp(-sC_3)$ . Therefore,  $\sum_{s=K_n}^{\infty} \Pr(\hat{\theta}_s(a) \geq r) = O(1)$  and we are done.

707 □

## 708 D.1 Proof that KL-UCB is log-consistent

709 This basically follows from Lemma D.1. Let  $\varepsilon = 1/2$ . Fix a group  $g$ , and let  $a$  be a suboptimal arm  
 710 for  $g$ .

$$\begin{aligned} \mathbb{E}[N_T^g(a)] &= \mathbb{E} \left[ \sum_{t=1}^T \mathbf{1}(\text{Pull}_t^g(a)) \right] \\ &\leq K_\varepsilon^g(T) + \mathbb{E} \left[ \sum_{t=1}^{t_{g(n)}} \mathbf{1}(\text{Pull}_t^g(a), N_t(a) \geq K_\varepsilon^g(T)) \right] \\ &= K_\varepsilon^g(T) + \log \log(T). \end{aligned}$$

711 We are done since  $K_\varepsilon^g(T) = O(\log T)$ .

## 712 D.2 Proof of Proposition C.2

713 Let  $a \in \mathcal{A}_{\text{sub}}$  be a suboptimal arm. Let  $\varepsilon > 0$ . Let

$$K_T = \max_{g \in G_a} K_\varepsilon^g(T).$$

714 Clearly, the maximum is attained in the group  $g$  with the smallest  $\text{OPT}(g)$ , so.

$$K_T = \left\lceil \frac{1 + \varepsilon}{\text{KL}(\theta_a, \text{OPT}(\Gamma(a)))} (\log T + 3 \log \log T) \right\rceil.$$



$$\begin{aligned}
\mathbb{E}[N_T(a)] &= \mathbb{E} \left[ \sum_{t=1}^T \mathbf{1}(A_t = a) \right] \\
&\leq K_T + \mathbb{E} \left[ \sum_{t=1}^T \mathbf{1}(A_t = a, N_t(a) \geq K_T) \right] \\
&\leq K_T + \sum_{g \in G_a} \mathbb{E} \left[ \sum_{t=1}^T \mathbf{1}(\text{Pull}_t^g(a), N_t(a) \geq K_T) \right] \\
&\leq K_T + \sum_{g \in G_a} O(\log \log T).
\end{aligned}$$

715 where the last inequality follows from Eq. (15) of Lemma D.1. Since this holds for any  $\varepsilon > 0$ , the  
716 desired result holds.

### 717 D.3 Proof of Proposition C.5 and Proposition C.6

718 Let  $g$  be a group, and let  $j$  be a suboptimal arm for group  $g$ ; i.e.  $\theta_j < \text{OPT}(g)$ . Fix  $\varepsilon > 0$ . We  
719 assume that the event  $R_t^g = \{W_t(g) \geq \frac{p_g t}{2}\}$  holds. Fix  $\delta > 0$  such that  $\frac{1-\delta}{1+\delta} = 1 - \varepsilon$ . Let  $a = \delta/2$ .  
720 We construct another instance  $\gamma$  where arm  $j$  is replace with  $\lambda$  so that arm  $j$  is the optimal arm for  $g$   
721 in the same manner as the Lai-Robbins proof. Specifically,  $\lambda > \theta_j$  such that

$$\text{KL}(\theta_j, \lambda) = (1 + \delta) \text{KL}(\theta_j, \text{OPT}(g)).$$

722 Our goal is to bound the probability of event  $\left\{ N_t(j) \leq \frac{(1-\delta) \log t}{\text{KL}(\theta_j, \lambda)} \right\}$ , which we split into two events:

$$\begin{aligned}
C_t &= \left\{ N_t(j) \leq \frac{(1-\delta) \log t}{\text{KL}(\theta_j, \lambda)}, L_{N_t(j)} \leq (1-a) \log t \right\}, \\
E_t &= \left\{ N_t(j) \leq \frac{(1-\delta) \log t}{\text{KL}(\theta_j, \lambda)}, L_{N_t(j)} > (1-a) \log t \right\},
\end{aligned}$$

723 where  $L_m = \sum_{i=1}^m \log \left( \frac{f(Y_i; \theta_j)}{f(Y_i; \lambda)} \right)$ .

724 Assumption (12), there exists a constant  $c$  such that if  $t$  is large enough that  $\Pr(R_t^g) \geq 1/2$ ,

$$\mathbb{E}_\gamma \left[ \sum_{a \in \mathcal{A}_{\text{sub}}} N_t^g(a) \mid R_t^g \right] \leq c \log t.$$

725 Since  $j$  is the unique optimal arm under  $\gamma$ ,

$$\mathbb{E}_\gamma \left[ W_t(g) - N_t^g(j) \mid R_t^g \right] \leq c \log t.$$

726 Using Markov's inequality and using the fact that  $W_t(g) \geq \frac{p_g t}{2}$ , we get

$$\begin{aligned}
\Pr_\gamma \left( N_t^g(j) \leq \frac{(1-\delta) \log t}{\text{KL}(\theta_j, \lambda)} \mid R_t^g \right) &= \Pr_\gamma \left( W_t(g) - N_t^g(j) \geq W_t(g) - \frac{(1-\delta) \log t}{\text{KL}(\theta_j, \lambda)} \mid R_t^g \right) \\
&\leq \Pr_\gamma \left( W_t(g) - N_t^g(j) \geq \frac{p_g t}{2} - \frac{(1-\delta) \log t}{\text{KL}(\theta_j, \lambda)} \mid R_t^g \right) \\
&\leq \frac{\mathbb{E} [W_t(g) - N_t^g(j) \mid R_t^g]}{\frac{p_g t}{2} - \frac{(1-\delta) \log t}{\text{KL}(\theta_j, \lambda)}} \\
&= O \left( \frac{\log t}{t} \right).
\end{aligned}$$

727 **Bounding**  $\Pr(C_t \mid R_t^g)$ : Following through with the same steps as the original proof, we can replace  
 728 (2.7) with

$$\Pr_\theta(C_t \mid R_t^g) \leq t^{1-a} \Pr_\gamma(C_t \mid R_t^g) \leq t^{1-a} O\left(\frac{\log t}{t}\right) = O\left(\frac{\log t}{t^a}\right).$$

729 **Bounding**  $\Pr(E_t \mid R_t^g)$ : Next, we need to show a probabilistic result in lieu of (2.8) of [10]. Let  
 730  $m = \frac{(1-\delta)\log t}{\text{KL}(\theta_j, \lambda)}$  and let  $\alpha > 0$  such that  $(1 + \alpha) = \frac{1-a}{1-\delta}$ . We need to upper bound

$$\begin{aligned} \Pr_\theta\left(\max_{j \leq m} L_j > (1-a)\log t\right) &= \Pr_\theta\left(\max_{j \leq m} L_j > (1+\alpha)\text{KL}(\theta_j, \lambda)m\right) \\ &\leq \Pr_\theta\left(\max_{j \leq m} \{L_j - j\text{KL}(\theta_j, \lambda)\} > \alpha\text{KL}(\theta_j, \lambda)m\right). \end{aligned}$$

731 Let  $Z_i = \log\left(\frac{f(Y_i; \theta_j)}{f(Y_i; \lambda)}\right) - \text{KL}(\theta_j, \lambda)$ . We have  $\mathbb{E}[Z_i] = 0$ . Let  $\text{Var}(Z_i) = \sigma^2$ . Then, by Kol-  
 732 mogorov's inequality, we have

$$\begin{aligned} \Pr_\theta\left(\max_{j \leq m} \sum_{i=1}^j Z_i > \alpha\text{KL}(\theta_j, \lambda)m\right) &\leq \frac{1}{\alpha^2 \text{KL}(\theta_j, \lambda)^2 m^2} \text{Var}\left(\sum_{i=1}^m Z_i\right) \\ &= \frac{\sigma^2}{\alpha^2 \text{KL}(\theta_j, \lambda)^2 m} \\ &= O\left(\frac{1}{\log t}\right), \end{aligned}$$

733 since  $m = \Theta(\log t)$ .

734 **Combine:** Combining, we have

$$\begin{aligned} \Pr_\theta\left(N_t(j) \leq \frac{(1-\delta)\log n}{\text{KL}(\theta_j, \lambda)} \mid R_t^g\right) &= \Pr_\theta(C_n \mid R_t^g) + \Pr_\theta(E_n \mid R_t^g) \\ &= O\left(\frac{\log t}{t^a}\right) + O\left(\frac{1}{\log t}\right). \end{aligned}$$

735 Since  $\text{KL}(\theta_j, \lambda) \leq (1+\delta)\text{KL}(\theta_j, \text{OPT}(g))$  and  $\frac{1-\delta}{1+\delta} = 1 - \varepsilon$ , we have

$$\Pr_\theta\left(N_t(j) \leq \frac{(1-\varepsilon)\log t}{\text{KL}(\theta_j, \text{OPT}(g))} \mid R_t^g\right) \leq O\left(\frac{1}{\log t}\right)$$

736 as desired.

737 *Proof of Proposition C.6.* The proof of this result follows the same steps as Proposition C.5. Let  
 738  $\varepsilon = 1/2$  and let  $\theta^* > \theta_j$  so that  $\frac{1-\varepsilon}{\text{KL}(\theta_j, \theta^*)} = b$ . In the proof of Proposition C.5, replace  $\text{OPT}(g)$  with  
 739  $\theta^*$ . Then, the same proof goes through and we get  $\Pr(N_t(j) \leq b \log n \mid R_t^g) = O\left(\frac{1}{\log t}\right)$ .  $\square$

## 740 E Proof of Theorem 4.1

741 To prove Theorem 4.1, our goal is to show that the total number of pulls of a suboptimal arm  $a$  is  
 742  $J(a) \log T$ , and those pulls are distributed amongst groups according to  $q_*^g(a)$ . The policy PF-UCB  
 743 assigns arms in a way that the distribution of groups that have pulled arm  $a$  converges to  $\hat{q}_t^g(a)$ .  
 744 Hence, our goal is to show that  $\hat{q}_t^g(a)$  is usually “close” to  $q_*^g(a)$ .

745 Let  $\delta_0 = \min_{a \neq a'} \frac{|\theta(a) - \theta(a')|}{4}$ . For  $\delta \in (0, \delta_0)$  let  $H_t(\delta) = \{\hat{\theta}_t(a) \in [\theta(a) - \delta, \theta(a) + \delta] \forall a \in \mathcal{A}\}$   
 746 be the event that all arms are within their “ $\delta$ -boundaries”. Since  $\delta < \delta_0$ , this implies that the ranking  
 747 of the arms do not change if  $H_t(\delta)$  is true (i.e.  $\theta(a) < \theta(a') \Rightarrow \hat{\theta}_t(a) < \hat{\theta}_t(a')$ ). We first state a result  
 748 pertaining to the program  $(P(\theta))$ , which states that if  $H_t(\delta)$  is true, the approximate solution  $\hat{q}_t$  is  
 749 also close to the true solution  $q_*$ .

750 **Proposition E.1.** For any  $\varepsilon > 0$ , there exists  $\delta > 0$  such that if  $H_t(\delta)$ , then  $\hat{q}_t^g(a) \in [q_*^g(a) -$   
751  $\varepsilon, q_*^g(a) + \varepsilon]$  for all  $a \in \mathcal{A}$  and  $g \in \mathcal{G}$ .

752 The proof of Proposition E.1 can be found in Appendix G.4. This result implies that when we have  
753 good empirical estimates of  $\theta$  (i.e.  $H_t(\delta)$  is true), the policy of ‘following’ the solution  $\hat{q}_t^g(a)$  will  
754 give us the desired ‘split’ of pulls between groups. Therefore, our goal is to show that suboptimal  
755 arms are pulled only when  $H_t(\delta)$  is true.

756 For  $a \in \mathcal{A}_{\text{sub}}^g$ , there are two reasons why  $\text{Pull}_t^g(a)$  would occur: (i)  $a = A_t^{\text{UCB}}(g')$  for some group  
757  $g'$ , or (ii)  $a = A_t^{\text{greedy}}(g)$ . We show that the regret from (ii) is negligible:

758 **Proposition E.2.** Let  $g$  be a group, and let  $a \in \mathcal{A}_{\text{sub}}^g$  be a suboptimal arm for  $g$ .

$$\sum_{t=1}^T \Pr(\text{Pull}_t^g(a), A_t^{\text{greedy}}(g) = a) = O(\log \log T).$$

759 Therefore, all of the regret stems from pulls of type (i), when an arm has the highest UCB. The next  
760 result says that essentially all pulls occur when  $H_t(\delta)$  is true:

761 **Proposition E.3.** Let  $\delta > 0$ . For any group  $g$  and action  $a \in \mathcal{A}_{\text{sub}}^g$ ,

$$\sum_{t=1}^T \Pr(\text{Pull}_t^g(a), A_t^{\text{greedy}}(g) \neq a, \bar{H}_t(\delta)) = O(\log \log T).$$

762 Lastly, we show that the total number of times an arm  $a \in \mathcal{A}_{\text{sub}}$  is pulled matches the lower bound:

763 **Proposition E.4.** Let  $a \in \mathcal{A}_{\text{sub}}$ .

$$\lim_{T \rightarrow \infty} \frac{\mathbb{E}[N_T(a)]}{\log T} = J(a).$$

764 We now prove Theorem 4.1 using Propositions E.2-E.4.

765 *Proof of Theorem 4.1.* Fix a group  $g$  and an arm  $a \in \mathcal{A}_{\text{sub}}^g$ . Let  $\varepsilon > 0$ . Let  $\delta \in (0, \delta_0)$  according to  
766 Proposition E.1. Let  $H_t = H_t(\delta)$ .

$$\begin{aligned} \mathbb{E}[N_T^g(a)] &= \sum_{t=1}^T \Pr(\text{Pull}_t^g(a)) \\ &= \sum_{t=1}^T (\Pr(\text{Pull}_t^g(a), A_t^{\text{greedy}}(g) \neq a, H_t) \\ &\quad + \Pr(\text{Pull}_t^g(a), A_t^{\text{greedy}}(g) = a) + \Pr(\text{Pull}_t^g(a), A_t^{\text{greedy}}(g) \neq a, \bar{H}_t)) \\ (18) \quad &\leq \sum_{t=1}^T \Pr(\text{Pull}_t^g(a), a \in \mathcal{A}_t^{\text{UCB}}, H_t) + O(\log \log T). \end{aligned}$$

767 where the last step follows from Proposition E.3 and Proposition E.2.

768 First, assume that  $a \notin \mathcal{A}_{\text{sub}}$ . That is, there exists a group  $g'$  such that  $a$  is optimal for  $g'$ . We claim  
769 that  $\Pr(\text{Pull}_t^g(a) \mid a \in \mathcal{A}_t^{\text{UCB}}, H_t) = 0$ . Notice that when  $H_t$  is true,  $a$  is not the greedy arm for  $g$ ,  
770 and moreover,  $a \notin \hat{\mathcal{A}}_{\text{sub}}$ . Therefore,  $a$  is not involved in the optimization problem  $(P(\theta))$ , and  $a$  is  
771 not the greedy arm for  $g$ , so  $g$  would not pull  $a$  when  $H_t$  is true. Therefore,  $\text{Pull}_t^g(a) = 0$  when  $H_t$  is  
772 true. This implies that if  $a \notin \mathcal{A}_{\text{sub}}$ ,

$$(19) \quad \lim_{T \rightarrow \infty} \frac{\mathbb{E}[N_T^g(a)]}{\log T} = 0.$$

773 Next, assume  $a \in \mathcal{A}_{\text{sub}}$ . By definition of the algorithm, if  $\{\text{Pull}_t^g(a), a \in \mathcal{A}_t^{\text{UCB}}\}$  occurs, then  
774  $N_t^g(a) \leq \hat{q}_t^g(a)N_t(a)$ . If  $H_t(\delta)$ , then  $\hat{q}_t^g(a) \leq q_t^g(a) + \varepsilon$ . Therefore,  $\sum_{t=1}^T \mathbf{1}(\text{Pull}_t^g(a), a \in$

775  $\mathcal{A}_t^{\text{UCB}}, H_t(\delta)) \leq (q_t^g(a) + \varepsilon)N_T(a)$ . Then, using (18), we can write

$$\begin{aligned} \limsup_{T \rightarrow \infty} \frac{\mathbb{E}[N_T^g(a)]}{\log T} &= \limsup_{T \rightarrow \infty} \frac{\mathbb{E} \left[ \sum_{t=1}^T \mathbf{1}(\text{Pull}_t^g(a), a \in \mathcal{A}_t^{\text{UCB}}, H_t(\delta)) \right] + O(\log \log T)}{\log T} \\ &\leq \limsup_{T \rightarrow \infty} \frac{(q^g(a) + \varepsilon)\mathbb{E}[N_T(a)]}{\log T} \\ &\leq (q^g(a) + \varepsilon)J(a), \end{aligned}$$

776 where the last inequality follows from Proposition E.4. Since this holds for all  $\varepsilon > 0$ ,

$$(20) \quad \limsup_{T \rightarrow \infty} \frac{\mathbb{E}[N_T^g(a)]}{\log T} \leq q^g(a)J(a).$$

777 Recall that Proposition E.4 states

$$(21) \quad \lim_{T \rightarrow \infty} \frac{\mathbb{E}[N_T(a)]}{\log T} = J(a).$$

778 This implies that (20) must be an equality all  $g$ . If this weren't the case, then  $\limsup_{T \rightarrow \infty} \frac{\mathbb{E}[N_T(a)]}{\log T}$   
779 would be strictly less than  $J(a)$ , which would be a contradiction.

780 Moreover, we claim that (20) and (21) implies  $\lim_{T \rightarrow \infty} \frac{\mathbb{E}[N_T^g(a)]}{\log T} = q^g(a)J(a)$  for all  $g$ . By contra-  
781 diction, suppose there exists a  $g' \in \mathcal{G}$  such that  $\liminf_{T \rightarrow \infty} \frac{\mathbb{E}[N_T^{g'}(a)]}{\log T} = q^{g'}(a)J(a) - \alpha$  for some  
782  $\alpha > 0$ . Then, (21) implies that  $\limsup_{T \rightarrow \infty} \sum_{g \neq g'} \frac{\mathbb{E}[N_T^g(a)]}{\log T} \geq (1 - q^{g'}(a))J(a) + \alpha$ , which is a  
783 contradiction. Therefore, for every  $g$ ,

$$\lim_{T \rightarrow \infty} \frac{\mathbb{E}[N_T^g(a)]}{\log T} = q^g(a)J(a).$$

784 Combining with (19) yields the desired result:

$$\lim_{T \rightarrow \infty} \frac{\mathbb{E}[\text{Regret}_T^g(a)]}{\log T} = \lim_{T \rightarrow \infty} \frac{\sum_{a \in \mathcal{A}} \Delta^g(a) \mathbb{E}[N_T^g(a)]}{\log T} = \lim_{T \rightarrow \infty} \sum_{a \in \mathcal{A}_{\text{sub}}} \Delta^g(a) q^g(a) J(a).$$

785 □

## 786 E.1 Proof of Propositions E.2-E.4

787 *Proof of Proposition E.2.* Let  $g \in \mathcal{G}$  and let  $a \in \mathcal{A}_{\text{sub}}^g$ . We bound  $\sum_{t=1}^T \Pr(\text{Pull}_t^g(a), a =$   
788  $A_t^{\text{greedy}}(g))$ . We can assume that the events  $\hat{\theta}_t(a) \in [\theta(a) - \delta, \theta(a) + \delta]$  and  $\Lambda_t$  occur using Lemma B.4,  
789 and Lemma B.2 respectively. Since  $a$  is the greedy arm, it must be that  $\hat{\theta}_t(a') \leq \theta(a) + \delta$  for all  
790  $a' \in \mathcal{A}^g$ .

791 Define the event

$$R_t = \{A_t^{\text{greedy}}(g) = a, \Lambda_t, \hat{\theta}_t(a) \leq \theta(a) + \delta, \hat{\theta}_t(a') \leq \theta(a) + \delta \forall a' \in \mathcal{A}^g\}.$$

792 Our goal is to bound  $\sum_{t=1}^T \Pr(R_t)$ .

793 For  $R_t$  to occur,  $\hat{\theta}_t(a') \leq \theta(a) + \delta$  (since  $a$  is the greedy arm) and  $\text{UCB}_t(a') \geq \text{OPT}(g)$  (since  $\Lambda_t$ )  
794 for all  $a' \in \mathcal{A}_{\text{opt}}^g$ . By Lemma B.3 there exists a constant  $c > 0$  such that if  $N_t(a') > c \log t$  for some  
795  $a' \in \mathcal{A}_{\text{opt}}^g$ ,  $R_t$  cannot happen. Moreover, for every  $a' \in \mathcal{A}_{\text{opt}}^g$ ,  $\Pr(N_t(a') < c \log t) < O\left(\frac{1}{\log t}\right)$   
796 from Proposition C.6.

797 Divide the time period into epochs, where epoch  $k$  starts at time  $s_k = 2^{2^k}$ . Let  $\mathcal{T}_k$  be the time  
798 steps in epoch  $k$ . Let  $G_k = \{N_{s_k}(a) > 3c \log s_k \forall a \in \mathcal{A}_{\text{opt}}^g\}$  be the event that all optimal arms  
799 were pulled at least  $3c \log s_k$  times by the start of epoch  $k$ . If  $G_k$  occurs, since  $s_k = \sqrt{s_{k+1}}$ ,

800  $N_{s_{k+1}}(a) > \frac{3}{2}r \log s_{k+1} > r \log s_{k+1}$ , and hence  $R_t$  can never happen during epoch  $k$ . Moreover,  
 801  $\Pr(\bar{G}_k) = O\left(\frac{1}{\log s_k}\right)$  for any  $k$ .

802 Suppose we are in a “bad epoch”, where  $G_k$  does not occur. We claim that  $R_t$  can’t occur more  
 803 than  $O(\log s_{k+1})$  times during epoch  $k$ . For  $R_t$  to occur, the arm  $j$  with the highest UCB satisfies  
 804  $\text{UCB}_t(j) \geq \text{OPT}(g)$  and  $\hat{\theta}_t(j) \leq \theta(a) + \delta$ .

805 **Claim E.5.** For any action  $j \in \mathcal{A}^g$ ,  $\sum_{t=1}^s \Pr(A_t^{\text{UCB}}(g) = j, \text{UCB}_t(j) \geq \text{OPT}(g), \hat{\theta}_t(j) \leq \theta(a) +$   
 806  $\delta \mid \bar{G}_k) = O(\log s)$ .

807 Using Claim E.5 and taking a union bound over all actions  $j$  implies  $\sum_{t \in \mathcal{T}_k} \Pr(R_t \mid \bar{G}_k) =$   
 808  $\sum_{t \in \mathcal{T}_k} \sum_{j \in \mathcal{A}^g} \Pr(R_t, A_t^{\text{UCB}}(g) = j \mid \bar{G}_k) = O(\log s_{k+1})$ . Since  $\Pr(\bar{G}_k) = O\left(\frac{1}{\log s_k}\right)$ ,  
 809  $\sum_{t \in \mathcal{T}_k} \Pr(R_t) = O(1)$ . Since there are  $O(\log \log T)$  epochs,  $\sum_{t=1}^T \Pr(R_t) = O(\log \log T)$ .

810  $\square$

811 *Proof of Proposition E.3.* Let  $H_t = H_t(\delta)$ . Fix a group  $g$  and an arm  $a \in \mathcal{A}_{\text{sub}}^g$ . For  $g$  to pull  $a$   
 812 when  $A_t^{\text{greedy}}(g) \neq a$ , it must be that  $a \in \mathcal{A}_t^{\text{UCB}}$ .

813 First, assume  $a \notin \mathcal{A}_{\text{sub}}$ . Then, there exist groups  $G \subseteq \mathcal{G}$  in which  $a$  is optimal. If  $a$  is the greedy arm  
 814 for some  $g' \in G$ , then  $a \notin \hat{\mathcal{A}}_{\text{sub}}$ , implying  $a$  is not considered in the optimization problem  $(\hat{P}_t)$ . In  
 815 this case, group  $g$  would never pull arm  $a$ . Therefore, it must be that  $a$  is not the greedy arm for all  
 816 groups in  $G$ . We show the following lemma, which proves the proposition for an arm  $a \notin \mathcal{A}_{\text{sub}}$ .

817 **Lemma E.6.** Let  $a \notin \mathcal{A}_{\text{sub}}$ , and let  $G$  be the set of groups in which  $a$  is optimal. Then,

$$\sum_{t=1}^T \Pr(\text{Pull}_t(a), A_t^{\text{greedy}}(g) \neq a \mid \forall g \in G, a \in \mathcal{A}_t^{\text{UCB}}) = O(\log \log T).$$

818 Now assume  $a \in \mathcal{A}_{\text{sub}}$ . We assume that the events  $\Lambda_t$  and  $\hat{\theta}_t(a) \in [\theta(a) - \delta, \theta(a) + \delta]$  hold using  
 819 Lemma B.2 and Lemma B.4. Since  $a \in \mathcal{A}_t^{\text{UCB}}$  and  $\Lambda_t$ , it must be that  $\text{UCB}_t(a) \geq \text{OPT}(\Gamma(a))$ . Let  
 820  $E_t = \{\text{Pull}_t^g(a), \Lambda_t, \hat{\theta}_t(a) \in [\theta(a) - \delta, \theta(a) + \delta], \text{UCB}_t(a) \geq \text{OPT}(\Gamma(a))\}$ . Our goal is to show

$$\mathbb{E} \left[ \sum_{t=1}^T \mathbf{1}(E_t, \bar{H}_t) \right] = O(\log \log T).$$

821 Divide the time interval into epochs, where epoch  $k$  starts at time  $s_k = 2^{2^k}$ . Let  $K = O(\log \log T)$   
 822 be the total number of epochs. Let  $\mathcal{T}_k$  be the time steps in epoch  $k$ .

823 Let  $H_k = \cap_{t \in \mathcal{T}_k} H_t$ . Clearly, if  $H_k$  is true, then by definition,  $\sum_{t \in \mathcal{T}_k} \mathbf{1}(E_t, \bar{H}_t) = 0$ . Therefore, we  
 824 can write

$$\mathbb{E} \left[ \sum_{t=1}^T \mathbf{1}(E_t, \bar{H}_t) \right] = \sum_{k=1}^K \mathbb{E} \left[ \sum_{t \in \mathcal{T}_k} \mathbf{1}(E_t, \bar{H}_t) \right] = \sum_{k=1}^K \left( \mathbb{E} \left[ \sum_{t \in \mathcal{T}_k} \mathbf{1}(E_t, \bar{H}_t) \mid \bar{H}_k \right] \Pr(\bar{H}_k) \right)$$

825 We bound the expectation and the probability separately.

826 **1) Bounding  $\mathbb{E} \left[ \sum_{t \in \mathcal{T}_k} \mathbf{1}(E_t, \bar{H}_t) \mid \bar{H}_k \right]$ :** If  $E_t$  occurs at some time step  $t$ ,  $\text{UCB}_t(a) \geq$   
 827  $\text{OPT}(\Gamma(a))$  and  $\hat{\theta}_t(a) \leq \theta(a) + \delta$ . By Lemma B.3 it must be that  $N_t(a) = O(\log t)$ . Clearly,  
 828  $N_s(a) \geq \sum_{t=1}^s \mathbf{1}(E_t)$ , implying that  $\sum_{t \in \mathcal{T}_k} \mathbf{1}(E_t) = O(\log s_{k+1})$ . Therefore,  $\sum_{t \in \mathcal{T}_k} \mathbf{1}(E_t, \bar{H}_t) \leq$   
 829  $\sum_{t=1}^{s_{k+1}} \mathbf{1}(E_t) = O(\log s_{k+1})$

830 **2) Bounding  $\Pr(\bar{H}_k)$ :** For  $a \in \mathcal{A}_{\text{sub}}$  let  $c_a = \frac{0.9}{\text{KL}(\theta(a), \text{OPT}(\Gamma(a)))}$ . For  $a \notin \mathcal{A}_{\text{sub}}$ , let  $c_a = 1$ . Let  
 831  $F_k = \{\hat{\theta}_{s_k}(a) \in [\theta(a) - \delta/2, \theta(a) + \delta/2], N_{s_k}(a) \geq c_a \log s_k \mid \forall a \in \mathcal{A}\}$  be the event that at time  
 832  $s_k$ , all arms  $a$  have been pulled  $c_a \log s_k$  times and all arms are within an “inner” boundary (half as  
 833 small as the boundary defined for  $H_t$ ). We bound  $\Pr(\bar{H}_k)$  by conditioning on the event  $F_k$ . Firstly,  
 834 we bound  $\Pr(\bar{F}_k)$  using the probabilistic lower bound of Proposition C.5-C.6:

835 **Lemma E.7.** For any  $k$ ,  $\Pr(\bar{F}_k) = O\left(\frac{1}{\log s_k}\right)$ .

836 Next, we show that if  $F_k$  is true, then  $H_k$  occurs with probability at least  $1 - O\left(\frac{1}{\log s_k}\right)$ .

837 **Lemma E.8.** For any action  $a$ ,  $\Pr\left(\hat{\theta}_t(a) \notin [\theta(a) - \delta, \theta(a) + \delta] \text{ for some } t \in \mathcal{T}_k \mid F_k\right) \leq$   
 838  $O\left(\frac{1}{\log s_k}\right)$ .

839 Therefore,

$$\Pr(\bar{H}_k) \leq \Pr(\bar{F}_k) + \Pr(\bar{H}_k \mid F_k) = O\left(\frac{1}{\log s_k}\right).$$

840 **3) Combine:** Combining, we have

$$\begin{aligned} \mathbb{E}\left[\sum_{t=1}^T \mathbf{1}(E_t, \bar{H}_t)\right] &\leq \sum_{k=1}^K \left(O(\log s_{k+1}) O\left(\frac{1}{\log s_k}\right)\right) \\ &\leq \sum_{k=1}^K O(1) \\ &= O(\log \log T), \end{aligned}$$

841 where the last inequality follows due to the fact that  $\frac{\log s_{k+1}}{\log s_k} = 2$  for any  $k$ .  $\square$

842 *Proof of Proposition E.4.* Let  $a \in \mathcal{A}_{\text{sub}}$ . We need to show  $\limsup_{T \rightarrow \infty} \frac{\mathbb{E}[N_T(a)]}{\log T} \leq J(a)$ , as the  
 843 lower bound is implied by (4). By Proposition E.2, the number of times  $a$  is pulled when  $a$  is the  
 844 greedy arm for some group  $g$  is  $O(\log \log T)$ . Therefore,

$$\mathbb{E}[N_T(a)] = \sum_{t=1}^T \Pr(\text{Pull}_t(a), a \in \mathcal{A}_t^{\text{UCB}}, H_t(\delta)) + O(\log \log T).$$

845 The rest of the proof relies on the same argument as Proposition C.2. The main idea is that after  
 846  $J(a) \log T + o(\log T)$  pulls of  $a$ , the UCB of  $a$  will not be larger than  $\text{OPT}(\Gamma(a))$ , and therefore  
 847  $a \notin \mathcal{A}_t^{\text{UCB}}$ .  $\square$

## 848 E.2 Deferred Proofs

849 *Proof of Claim E.5.* Recall that  $G_k = \{N_{s_k}(a) > 3c \log s_k \mid a \in \mathcal{A}_{\text{opt}}^g\}$ . We will show  
 850  $\sum_{t=1}^T \Pr(A_t^{\text{UCB}} = j, \text{UCB}_t(j) \geq \text{OPT}(g), \hat{\theta}_t(j) \leq \theta(a) + \delta \mid \bar{G}_k) = O(\log \log T)$ . From  
 851 Lemma B.3, there exists a constant  $c'$  such that if  $N_t(j) > c' \log T$  then,  $\{\text{UCB}_t(j) \geq$   
 852  $\text{OPT}(g), \hat{\theta}_t(j) \leq \theta(a) + \delta\}$  cannot occur.

$$\begin{aligned} &\sum_{t \in \mathcal{T}_k} \Pr(A_t^{\text{UCB}}(g) = j, \text{UCB}_t(j) \geq \text{OPT}(g), \hat{\theta}_t(j) \leq \theta(a) + \delta \mid \bar{G}_k) \\ &= \sum_{n=1}^{c' \log T} \sum_{t \in \mathcal{T}_k} \Pr(A_t^{\text{UCB}}(g) = j, \text{UCB}_t(j) \geq \text{OPT}(g), \hat{\theta}_t(j) \leq \theta(a) + \delta, N_t(a) = n \mid \bar{G}_k) \\ (22) \quad &\leq \sum_{n=1}^{c' \log T} \sum_{t \in \mathcal{T}_k} \Pr(A_t^{\text{UCB}}(g) = j, N_t(a) = n \mid \bar{G}_k). \end{aligned}$$

853 Our goal is to show that  $\sum_{t \in \mathcal{T}_k} \Pr(A_t^{\text{UCB}}(g) = j, N_t(a) = n \mid \bar{G}_k) = O(1)$  for any  $n$ . Fix  $n$ , and  
 854 write

$$\sum_{t \in \mathcal{T}_k} \Pr(A_t^{\text{UCB}}(g) = j, N_t(j) = n \mid \bar{G}_k) = \mathbb{E}\left[\sum_{t \in \mathcal{T}_k} \mathbf{1}(A_t^{\text{UCB}}(g) = j, N_t(j) = n) \mid \bar{G}_k\right]$$

Let  $L_t = \mathbf{1}(A_t^{\text{UCB}}(g) = j, N_t(j) = n)$  be the indicator for the event of interest. Our goal is to count the number of times  $L_t$  occurs. Let  $Y_m = \{\exists t : \sum_{s=1}^t L_s = m\}$  be the event that  $L_s$  occurs at least  $m$  times. Note that for  $Y_m$  to occur, it must be that  $Y_{m-1}$  occurred. Therefore, by expliciting writing out the expectation, we have

$$\begin{aligned} \mathbb{E} \left[ \sum_{t=1}^T \mathbf{1}(A_t^{\text{UCB}}(g) = j, N_t(j) = n) \mid \bar{G}_k \right] &\leq \sum_{m \geq 1} m \Pr(Y_m \mid \bar{G}_k) \\ &= \sum_{m \geq 1} m \Pr(Y_m \mid Y_{m-1}, \bar{G}_k) \Pr(Y_{m-1} \mid \bar{G}_k). \end{aligned}$$

We claim that there exists a  $\lambda \in (0, 1)$  such that  $\Pr(Y_m \mid Y_{m-1}, \bar{G}_k) \leq \lambda$ . Let  $\tau$  be the time when  $L_s$  occurred for the  $m-1$ 'th time, which exists since  $Y_{m-1}$  is true. For  $Y_m$  to occur, it must be that arm  $j$  was not pulled at time  $\tau$ , even though arm  $j$  is the UCB. Given that  $j$  is the UCB, there exists a group  $g$  in which  $N_\tau^g(a) \leq \hat{q}_t^g(a) N_\tau(a)$ . If such a group arrives, it will pull  $j$  with probability at least  $\frac{1}{K}$ . Therefore, at time  $\tau$ , the probability that arm  $j$  will be pulled is at least  $\min_{g \in G} \frac{p_g}{K}$ . Then,  $\lambda = 1 - \min_{g \in G} \frac{p_g}{K}$  satisfies  $\Pr(Y_m \mid Y_{m-1}, \bar{G}_k) \leq \lambda$ .

Therefore,

$$\begin{aligned} \mathbb{E} \left[ \sum_{t=1}^T \mathbf{1}(A_t^{\text{UCB}} = j, N_t(j) = n) \mid \bar{G}_k \right] &= \sum_{m \geq 1} m \Pr(Y_m \mid Y_{m-1}, \bar{G}_k) \Pr(Y_{m-1} \mid \bar{G}_k) \\ &\leq \sum_{m \geq 1} m \lambda^m \\ &= O(1). \end{aligned}$$

Substituting back into (22) gives

$$\sum_{t=1}^T \Pr(A_t^{\text{UCB}} = j, \text{UCB}_t(j) \geq \text{OPT}(g), \hat{\theta}_t(j) \leq \theta(a) + \delta \mid \bar{G}_k) \leq \sum_{n=1}^{c' \log T} O(1) = O(\log T).$$

□

*Proof of Lemma E.6.* Let  $a \notin \mathcal{A}_{\text{sub}}$ , let  $G$  be the set of groups in which  $a$  is an optimal arm. We condition on whether  $a$  is the UCB for some group in  $G$ .

First, suppose  $a = A_t^{\text{UCB}}(g)$  for some group  $g \in G$ , implying  $\theta(a) = \text{OPT}(g)$ . We can assume  $\hat{\theta}_t(a) > \text{OPT}(g) - \delta$  from Lemma B.4. Then, if  $a$  is not the greedy arm for  $g$ , there exists a suboptimal arm  $j \in \mathcal{A}_{\text{sub}}^g$  with higher mean but lower UCB than  $a$ . This implies that the UCB radius of  $j$  is smaller than the UCB radius of  $a$ , implying that  $j$  was pulled more times:  $N_t(j) \geq N_t(a)$ . We show that this event cannot happen often. Let  $E_t = \{\text{Pull}_t(a), A_t^{\text{greedy}}(g) \neq a, a \in \mathcal{A}_t^{\text{UCB}}, a = A_t^{\text{UCB}}(g), \hat{\theta}_t(a) > \text{OPT}(g) - \delta\}$ . For any  $j \in \mathcal{A}_{\text{sub}}^g$ ,

$$\begin{aligned} &\sum_{t=1}^T \mathbf{1}(E_t, N_t(j) \geq N_t(a), \hat{\theta}_t(j) > \text{OPT}(g) - \delta) \\ &\leq \sum_{t=1}^T \sum_{n=1}^t \sum_{n_j=n}^t \mathbf{1}(E_t, \hat{\theta}_{n_j}(j) > \text{OPT}(g) - \delta, N_t(j) = n_j, N_t(a) = n) \\ &\leq \sum_{n_j=1}^T \mathbf{1}(\hat{\theta}_{n_j}(j) > \text{OPT}(g) - \delta) \sum_{n=1}^{n_j} \sum_{t=n}^T \mathbf{1}(E_t, N_t(a) = n) \\ &\leq \sum_{n_j=1}^T \mathbf{1}(\hat{\theta}_{n_j}(j) > \text{OPT}(g) - \delta) n_j, \end{aligned}$$

where the last inequality uses  $\sum_{t=n}^T \mathbf{1}(E_t, N_t(a) = n) \leq 1$  (since pulling arm  $a$  increasing  $N_t(a)$  by 1). Since  $\Pr(\hat{\theta}_n(j) > \text{OPT}(g) - \delta) \leq \exp(-cn)$  for some constant  $c > 0$ ,  $\sum_{t=1}^T \Pr(E_t, N_t(j) \geq N_t(a), \hat{\theta}_t(j) > \text{OPT}(g) - \delta) = O(1)$ . Taking a union bound over actions  $j \in \mathcal{A}_{\text{sub}}^g$  gives us the desired result:

$$\sum_{t=1}^T \Pr(\text{Pull}_t(a), A_t^{\text{greedy}}(g) \neq a \ \forall g \in G, a \in \mathcal{A}_t^{\text{UCB}}, \exists g \in G : a = A_t^{\text{UCB}}(g)) = O(\log \log T).$$

Now, suppose  $a \notin A_t^{\text{UCB}}(g)$  for all  $g \in G$ . This means that there is another group  $h$  where  $a = A_t^{\text{UCB}}(h)$ , but  $a$  is suboptimal for  $h$ . We assume  $\Lambda_t$  holds. Let  $a_h$  be an optimal arm for  $h$ . Since  $\Lambda_t$ ,  $\text{UCB}_t(a_h) \geq \text{OPT}(h)$ . Therefore, it must be that  $\text{UCB}_t(a) \geq \text{OPT}(h)$ . By Lemma C.4,

$$\sum_{t=1}^T \Pr(\text{Pull}_t(a), \text{UCB}_t(a) \geq \text{OPT}(h)) = O(\log \log T).$$

This finishes the proof.  $\square$

*Proof of Lemma E.7.* Fix  $a \in \mathcal{A}$  and time  $t$ . We will show  $\Pr(\hat{\theta}_{s_k}(a) \in [\theta(a) - \delta/2, \theta(a) + \delta/2], N_{s_k}(a) \geq c_a \log s_k) \geq 1 - O\left(\frac{1}{\log t}\right)$ . Then the result follows from taking a union bound over actions. We first show that PF-UCB is log-consistent.

**Lemma E.9.** *PF-UCB is log-consistent.*

Let  $g \in \Gamma(a)$ . Since  $\Pr(M_t(a) < \frac{p_a}{2}t) \leq \exp(-\frac{1}{2}p_g t)$ , we can assume that there have been at least  $\frac{p_a}{2}t$  arrivals of  $g$  by time  $t$ . Then, using Proposition C.5 and Proposition C.6, we know that at time  $t$ ,  $\Pr(N_t(a) < c_a \log t | M_t(a) \geq \frac{p_a}{2}t) \leq O\left(\frac{1}{\log t}\right)$ . Next, we show that the probability of the event  $\hat{\theta}_t(a) \notin [\theta(a) - \delta/2, \theta(a) + \delta/2]$  given that we have more than  $c_a \log t$  pulls of  $a$  is small.

$$\begin{aligned} & \Pr(\hat{\theta}_t(a) \notin [\theta(a) - \delta/2, \theta(a) + \delta/2] \mid N_t(a) \geq c_a \log t) \\ &= \sum_{n=c_a \log t}^t \Pr(\hat{\theta}_n(a) \notin [\theta(a) - \delta/2, \theta(a) + \delta/2] \mid N_t(a) = n) \Pr(N_t(a) = n) \\ &\leq \sum_{n=c_a \log t}^t \exp(-c_1 n) \Pr(N_t(a) = n) \\ &\leq c_3 \exp(-c_2 \log t) \\ &\leq \frac{c_3}{t^{c_2}}, \end{aligned}$$

for some constants  $c_1, c_2, c_3 > 0$  that depends on the instance,  $a$ , and  $\delta$ . Combining, we have that for any action  $a$ ,  $\Pr(\hat{\theta}_{s_k}(a) \in [\theta(a) - \delta/2, \theta(a) + \delta/2], N_{s_k}(a) \geq c_a \log s_k) \geq 1 - O\left(\frac{1}{\log t}\right)$ .

$\square$

*Proof of Lemma E.8.* Let  $U_a = \theta(a) + \delta$  and  $U_a^I = \theta(a) + \delta/2$ . Let  $\eta = U_a - U_a^I$ . Since  $F_k$  is true,  $N_{s_k}(a) \geq c_a \log s_k$ . Let  $n_1 = N_{s_k}(a)$ . Let  $\hat{\theta}^{n_1}(a)$  be the empirical average of arm  $a$  after  $n$  pulls. We will bound

$$\Pr(\cup_{n_2=n_1+1}^{\infty} \{\hat{\theta}^{n_2}(a) \notin [L_a, U_a]\} \mid \hat{\theta}^{n_1}(a) \in [L_a^I, U_a^I]).$$



898 For any  $n_2$ ,  $\hat{\theta}^{n_2}(a) > U_a$  implies  $\hat{\theta}^{n_2}(a) > \hat{\theta}^{n_1}(a) + \eta$ . Fix  $n_2 > n_1$ . Let  $m = n_2 - n_1$ .

$$\begin{aligned} \left\{ \hat{\theta}^{n_2}(a) > U_a \right\} &= \left\{ \sum_{i=1}^{n_2} X_i > n_2 U_a \right\} \\ &= \left\{ n_1 \hat{\theta}^{n_1}(a) + \sum_{i=n_1+1}^{n_2} X_i > n_2 U_a \right\} \\ &= \left\{ \sum_{j=1}^m X_{n_1+j} > n_1(U_a - \hat{\theta}^{n_1}(a)) + m U_a \right\} \\ &= \left\{ \sum_{j=1}^m (X_{n_1+j} - \mu) > n_1(U_a - \hat{\theta}^{n_1}(a)) + m(U_a - \mu) \right\} \end{aligned}$$

899 **Case  $m \leq n_1$ :** Since  $U_a - \mu > 0$  and  $U_a - \hat{\theta}^{n_1}(a) > \eta$  if  $F_k$  is true,

$$\begin{aligned} \Pr \left( \bigcup_{m=1}^{n_1} \{ \hat{\theta}^{n_1+m}(a) > U_a \} \mid F_k \right) &\leq \Pr \left( \bigcup_{m=1}^{n_1} \left\{ \sum_{j=1}^m (X_{n_1+j} - \mu) > n_1 \eta \right\} \mid F_k \right) \\ &\leq \Pr \left( \max_{m=1, \dots, n_1} S_m > n_1 \eta \mid F_k \right), \end{aligned}$$

900 where  $S_m = \sum_{j=1}^m (X_{n_1+j} - \mu)$ . Given that  $X_{n_1+j} - \mu$  are zero mean independent random variables,  
901 by Kolomogorov's inequality, we have

$$\begin{aligned} \Pr \left( \bigcup_{m=1}^{n_1} \{ \hat{\theta}^{n_1+m}(a) > U_a \} \mid F_k \right) &\leq \frac{1}{n_1^2 \eta^2} \text{Var}(S_{n_1}) \\ &= \frac{\sigma^2}{n_1 \eta^2} \\ &= \frac{\sigma^2}{\eta^2} \cdot \frac{1}{c_a \log s_k}, \end{aligned}$$

902 where  $\sigma_2 = \text{Var}(X_1)$ .

903 **Case  $m > n_1$ :**

$$\begin{aligned} \Pr \left( \bigcup_{m=n_1}^{\infty} \{ \hat{\theta}^{n_1+m}(a) > U_a \} \mid F_k \right) &\leq \Pr \left( \bigcup_{m=n_1}^{\infty} \left\{ \frac{\sum_{j=1}^m (X_{n_1+j} - \mu)}{m} > U_a - \mu \right\} \mid F_k \right) \\ &\leq \sum_{m=n_1}^{\infty} \Pr \left( \frac{\sum_{j=1}^m (X_{n_1+j} - \mu)}{m} > U_a - \mu \mid F_k \right) \\ &\leq \sum_{m=n_1}^{\infty} \exp(-mD) \\ &= \frac{\exp(-n_1 D)}{1 - \exp(-D)} \\ &= \frac{1}{s_k^{c_a D} (1 - \exp(-D))}, \end{aligned}$$

904 for a constant  $D > 0$  that depends on  $U_a - \mu$  and  $\sigma^2$ .

905 Therefore,

$$\begin{aligned}
& \Pr \left( \bigcup_{m=1}^{\infty} \{ \hat{\theta}^{N_{s_k}(a)+m}(a) > U_a \} \mid F_k \right) \\
& \leq \Pr \left( \bigcup_{m=1}^{n_1} \{ \hat{\theta}^{N_{s_k}(a)+m}(a) > U_a \} \mid F_k \right) + \Pr \left( \bigcup_{m=n_1}^{\infty} \{ \hat{\theta}^{N_{s_k}(a)+m}(a) > U_a \} \mid F_k \right) \\
& \leq \frac{\sigma^2}{\eta^2} \cdot \frac{1}{c_a \log s_k} + \frac{1}{s_k^{c_a D} (1 - \exp(-D))} \\
& = O \left( \frac{1}{\log s_k} \right),
\end{aligned}$$

906 as desired.  $\square$

907 *Proof of Lemma E.9.* Fix a group  $g$ . At time  $t$ , if group  $g$  arrives, the PF-UCB pulls either the UCB  
 908 arm or the greedy arm. The original regret analysis of KL-UCB from [28] shows that

$$\sum_{t=1}^T \Pr(A_t \notin \mathcal{A}_{\text{opt}}^g, A_t = A_t^{\text{UCB}}, g_t = g) = O(\log T).$$

909 Proposition E.2 shows that the number of times the greedy arm is pulled and incurs regret is  
 910  $O(\log \log T)$ . Combining, the total regret is  $O(\log T)$ .  $\square$

## 911 F Price of Fairness Proofs

### 912 F.1 Proof of Theorem 4.2

913 *Proof.* Consider the set of profiles  $(s^g)_{g \in \mathcal{G}}$  that are in the feasible region of the polytope defined  
 914 by the constraints of  $(P(\theta))$ . Refer to this polytope as the “utility set”, in the language of [29]. This  
 915 utility set is compact and convex, and therefore we can apply Theorem 2 of [29], which gives us  
 916 the desired inequality. It is easy to see that the point in this utility set that maximizes total utility  
 917 corresponds to a regret-optimal policy, and the point in the utility set that maximizes proportional  
 918 fairness corresponds to PF-UCB (by definition, since PF-UCB maximizes proportional fairness within  
 919 this set).  $\square$

### 920 F.2 Proof of Proposition 4.3

921 *Proof.* In this proof, for convenience, we use subscripts instead of superscript to refer to groups  $g$   
 922 since we do not need to refer to time steps.

923 Let  $\{1, \dots, M\}$  be the set of shared arms, where  $\theta_1 \leq \dots \leq \theta_M$ . Let  $\mathcal{G} = [G]$  be the set of  
 924 groups, where  $\text{OPT}(1) \leq \dots \leq \text{OPT}(G)$ . We assume that  $\theta_M < \text{OPT}(1)$ . (If there is a shared  
 925 arm whose reward is as large as  $\text{OPT}(1)$ , then neither policy will incur any regret from this arm,  
 926 and hence this arm is irrelevant.) In this case, all of the regret in the regret-optimal solution goes  
 927 to group 1, and the other groups incur no regret. Therefore, the total utility gain of the regret-  
 928 optimal solution is the sum of the regret at the disagreement point for groups 2 to  $G$ . Specifically,  
 929  $\lim_{T \rightarrow \infty} \text{SYSTEM}_T(\mathcal{I}) = \lim_{T \rightarrow \infty} \sum_{g=2}^G \frac{\tilde{R}_T^g(\pi^{\text{KL-UCB}})}{\log T}$ .

930 We will show that for each group  $g \geq 2$ , the regret incurred from PF-UCB is less than half of the  
 931 regret at the disagreement point — i.e.  $R_T^g(\pi^{\text{PF-UCB}}, \mathcal{I}) \leq \frac{1}{2} \tilde{R}_T^g(\mathcal{I})$ . Then, the utility gain for the  
 932 group reduces by at most a half from the regret-optimal solution, which is our desired result.

933 Let  $R_g = \lim_{T \rightarrow \infty} \frac{R_T^g(\pi^{\text{PF-UCB}}, \mathcal{I})}{\log T}$  and  $\tilde{R}_g = \lim_{T \rightarrow \infty} \frac{\tilde{R}_T^g(\mathcal{I})}{\log T}$  for all  $g \in \mathcal{G}$ . Recall that the proportion-  
 934 ally fair solution comes out of the optimal solution to the following optimization problem:

$$(P(\theta)) \quad \begin{aligned} \max_{q \geq 0} \quad & \sum_{g \in \mathcal{G}} \log \left( \sum_{a \in \mathcal{A}_{\text{sub}}^g} \Delta^g(a) (J^g(a) - q^g(a) J(a)) \right)^+ \\ \text{s.t.} \quad & \sum_{g \in \mathcal{G}} q^g(a) = 1 \quad \forall a \in \mathcal{A}_{\text{sub}} \\ & q^g(a) = 0 \quad \forall g \in G, a \notin \mathcal{A}_{\text{sub}} \cap \mathcal{A}_g. \end{aligned}$$

935 We first show a structural result of the optimal solution. Note that in terms of minimizing total regret,  
 936 it is optimal for group 1 to pull all suboptimal arms. Therefore, if  $q_g(a) > 0$  for some  $g > 1$ , we  
 937 think of this as “transferring” pulls of arm  $a$  from group 1 to group  $g$ . This transfer increases the  
 938 regret by a factor of  $\frac{\Delta_g(a)}{\Delta_1(a)}$ . We prove the following property that these transfers must satisfy:

939 **Claim F.1** (Structure of Optimal Solution). *For  $g \in [M]$ , let  $b = \max\{a : q_g(a) > 0\}$ . If  $h < g$ ,  
 940 then  $q_h(a) = 0$  for all  $a < b$ .*

941 Writing out the KKT conditions of the optimization problem gives us the following result.

942 **Claim F.2** (KKT conditions). *Let  $g, h \in \mathcal{G}$ ,  $a \in \mathcal{A}$  such that  $q_g(a) > 0$  and  $h < g$ . Then,  
 943  $s_g \geq s_h \frac{\Delta_g(a)}{\Delta_h(a)}$ . Moreover, if  $q_1(a) > 0$ ,  $s_g \leq \frac{\Delta_2(a)}{\Delta_1(a)} s_1$  for any  $g > 1$ .*

944 The next claim is immediate from Claim F.2.

945 **Claim F.3.** *If  $h < g$  and there exists an arm  $a$  such that  $q_g(a) > 0$ , then  $s_g \leq s_h$ .*

946 Regret is minimized if  $q_1(a) = 1$  for all  $a$ , in which case  $s_1 = 0$ . If  $s_1 \neq 0$ , then we think of this  
 947 as pulls from group 1 that are re-allocated to other groups  $g \neq 1$ . This re-allocation increases total  
 948 regret, since other groups incur more regret from pulling any arm compared to group 1.

949 Let  $a_0 = \max\{a : q_g(a) \neq 1\}$ . All pulls for any action  $a > a_0$  come from group 1. We claim that  
 950  $q_2(a_0) > 0$ . Suppose not. Let  $a' > 2$  such that  $q_2(a_0) > 0$ . Then, by Claim F.1,  $q_2(a) = 0$  for  
 951 all  $a$ . This implies that  $s_2 = r_2 > r_{a'} \geq s_{a'}$ , which contradicts Claim F.3. Then, by Claim F.2,  
 952  $s_2 = s_1 \frac{\Delta_2(a_0)}{\Delta_1(a_0)}$ .

953 Next, we claim that  $s_2 \geq \frac{\tilde{R}_2}{2}$ , which proves the desired result for  $g = 2$ . Note that  $s_1$  represents the  
 954 amount of regret that was “transferred” from group 1 to other groups, which increases the total regret.  
 955 If all of this was transferred to group 2, the total regret from group 2 would be at most  $s_1 \frac{\Delta_2(a_2)}{\Delta_1(a_2)} \leq s_2$ .  
 956 Therefore,  $R_2 \leq s_2$ . Since  $R_2 + s_2 = \tilde{R}_2$ ,  $s_2 \geq \frac{\tilde{R}_2}{2}$ .

957 For  $g > 2$ , Claim F.2 shows  $s_g \geq s_2$ . Moreover, since  $\text{OPT}(g) \geq \text{OPT}(2)$ ,  $\tilde{R}_g \leq \tilde{R}_2$ . Therefore,  
 958  $s_g \geq s_2 \geq \frac{\tilde{R}_2}{2} \geq \frac{\tilde{R}_g}{2}$  as desired.

959 □

### 960 F.3 Proof of Claims

961 *Proof of Claim F.1.* Suppose not. Let  $g \in \mathcal{G}$  and  $b = \max\{a : q_g(a) > 0\}$ . Let  $a < b$  such that  
 962  $q_h(a) > 0$ . Then, since  $\sum_{g'} q_{g'}(a) = 1$ ,  $q_g(a) < 1$ . By the ordering of arms and groups, we have

$$(23) \quad \frac{\Delta_h(a)}{\Delta_g(a)} > \frac{\Delta_h(b)}{\Delta_g(b)}.$$

963 We essentially show, using this inequality, that if we want to “transfer” pulls from group  $h$  to  $g$ , it  
 964 is more efficient to do so using arm  $a$  rather than arm  $b$ , and hence it is a contradiction that  $q_h(b)$  is  
 965 positive.

966 We construct a “swap” that will strictly increase the objective function. Let  $\varepsilon = \min\{q_h(a), q_g(b), 1 -$   
 967  $q_g(a), 1 - q_h(b)\}$ .

- Decrease  $q_h(a)$  by  $\varepsilon$ , and increase  $q_h(b)$  by  $\frac{\Delta_h(a)J(a)}{\Delta_h(b)J(b)}\varepsilon \leq \varepsilon$ , where the last inequality follows from the convexity of  $\text{KL}(\theta_b, \cdot)$ . By construction,  $s_h$  does not change.
- Increase  $q_g(a)$  by  $\varepsilon$ , and decrease  $q_g(b)$  by  $\frac{\Delta_h(a)J(a)}{\Delta_h(b)J(b)}\varepsilon$ . The first operation decreases  $s_g$  by  $\Delta_g(a)J(a)\varepsilon$ , while the second operation increases  $s_g$  by  $\frac{\Delta_h(a)J(a)\Delta_g(b)}{\Delta_h(b)}\varepsilon$ . By (23), this strictly increases  $s_g$  overall.

This is a contradiction.  $\square$

*Proof of Claim F.2.* From the stationarity KKT condition, we have that

$$\frac{\Delta_g(a)J(a)}{s_g} + \lambda(a) - \mu_g(a) = 0,$$

$$\frac{\Delta_h(a)J(a)}{s_h} + \lambda(a) - \mu_h(a) = 0,$$

for some  $\lambda_a \in \mathbb{R}$  and  $\mu_g(a), \mu_h(a) \geq 0$ . From complementary slackness,  $\mu_g(a)q_g(a) = 0$ . Since  $q_g(a) > 0$ , it must be that  $\mu_g(a) = 0$ . Since  $\mu_h(a) \geq 0$ ,  $\frac{\Delta_g(a)J(a)}{s_g} \leq \frac{\Delta_h(a)J(a)}{s_h}$ .  $\square$

## G Other Proofs

### G.1 Proof that Nash Solution is Unique Under Grouped Bandit Model

The uniqueness of the Nash bargaining solution in the general bargaining problem requires that the set  $U$  is convex. In the grouped bandit model, it is not clear that the set  $U(\mathcal{I}) = \{(\text{UtilGain}^g(\pi, \mathcal{I}))_{g \in \mathcal{G}} : \pi \in \Psi\}$  is convex. In this section, we show that the uniqueness theorem still holds in the grouped bandit setting.

Let  $G$  be the number of groups. Let  $W(u) = \sum_{g \in \mathcal{G}} \log u_g$ , and let  $f(U) = \arg\max_{u \in U} W(u)$  for  $U \subseteq \mathbb{R}^G$ . Fix a grouped bandit instance  $\mathcal{I}$ , and let  $u^* = f(U(\mathcal{I}))$ . We first show that  $u^*$  is unique (i.e.  $\arg\max_{u \in U(\mathcal{I})} W(u)$  is unique). Suppose there was another  $u' \in U(\mathcal{I})$  with the same welfare. Then, let  $\bar{u} \in U(\mathcal{I})$  be the policy that runs  $u'$  with probability 50%, and  $u^*$  with probability 50%. Using the fact that  $\liminf_{T \rightarrow \infty} (a_T + b_T) \geq \liminf_{T \rightarrow \infty} a_T + \liminf_{T \rightarrow \infty} b_T$  implies that  $\bar{u}_g \geq \frac{1}{2}(u_g^* + u'_g)$  for all  $g$ . Since  $\log$  is strictly concave,  $\log \bar{u}_g > \frac{1}{2}(\log u_g^* + \log u'_g)$ . This implies  $W(\bar{u}) > W(u^*)$ , which is a contradiction.

Next, we show that  $f$  is the unique solution that satisfies the four axioms. Let  $U = U(\mathcal{I})$ . It is easy to see that this solution satisfies the axioms. We need to show that no other solution satisfies them. Suppose  $g(\cdot)$  satisfies the axioms. We need to show  $g(U) = f(U)$ . Let  $U' = \{(\alpha_g u_g)_{g \in \mathcal{G}} : u \in U; \alpha_g u_g^* = 1, \alpha_g > 0\}$ .  $U'$  is the translated utility set so that  $u^*$  becomes the 1 vector. Then, the optimal welfare is  $W(\mathbf{1}) = 0$ . We need to show  $g(U') = \mathbf{1}$ . We claim that there is no  $v \in U'$  such that  $\sum_{g \in \mathcal{G}} v_g > G$ . Assume that such a  $v$  exists. For  $\lambda \in (0, 1)$ , let  $t$  be the utilities from the policy that runs the policy induced by  $v$  with probability  $\lambda$ , and the policy induced by  $\mathbf{1}$  with probability  $1 - \lambda$ . Then, by the same argument with  $\liminf$  to prove uniqueness,  $t_g \geq \lambda v_g + (1 - \lambda)1$ . If  $\lambda$  is small enough, then  $\sum_{g \in \mathcal{G}} \log t_g > 0$ . This is a contradiction to  $\mathbf{1}$  maximizing  $W(\cdot)$ .

Consider the symmetric set  $U'' = \{u \in \mathbb{R}^G : u \geq 0, \sum_g u_g \leq G\}$ . We have shown that  $U' \subseteq U''$ . By Pareto efficiency and symmetry, it must be that  $g(U'') = \mathbf{1}$ . By independence of irrelevant alternatives,  $g(U') = \mathbf{1}$ , and we are done.

### G.2 Proof that Assumption 2.2 is Sufficient

**Proposition G.1.** *If an instance  $\mathcal{I}$  satisfies Assumption 2.2, then there exists a consistent policy  $\pi$  such that  $f(\pi) > -\infty$ . Otherwise,  $f(\pi) = -\infty$  for all  $\pi \in \Psi$ .*

*Proof.* First, suppose  $\mathcal{I}$  satisfies Assumption 2.2. We need to show that there exists a consistent policy such that  $f(\pi) > -\infty$ . We will construct a feasible solution to the optimization problem  $(P(\theta))$  with a strictly positive objective value. This will imply that the objective value  $Y^*$  is strictly larger than 0, and hence the social welfare of PF-UCB is higher than  $-\infty$ .

For each arm  $a \in \mathcal{A}$ , let  $g(a) \in \Gamma(a)$ . Start with  $q^{g(a)}(a) = 1$  for all  $a$  and  $q^g(a) = 0$  for  $g \neq g(a)$ . We will modify these values for suboptimal arms  $\mathcal{A}_{\text{sub}}$ . For arm  $a \in \mathcal{A}_{\text{sub}}$ , let  $g'(a) \neq g(a)$  be another group with access to arm  $a$ . We will “split” the pulls of arm  $a$  between groups  $g(a)$  and  $g'(a)$  in a way that both groups benefit from the disagreement point. Let  $p(a) \in [0, 1]$  such that  $p(a)J(a) = J^{g'(a)}(a)$ . Let  $q^{g'(a)} = p(a)/2$  and  $q^{g(a)} = 1 - p(a)/2$ . Then,  $J^g(a) - q^g(a)J(a) > 0$  for  $g \in \{g(a), g'(a)\}$ . This implies that  $s^g > 0$  for all  $g$ , and therefore  $Y^* > 0$ . This proves the first part of the proposition.

For the second statement, suppose  $\mathcal{I}$  does not satisfy Assumption 2.2. Let  $g'$  be the group that does not have a suboptimal arm that is shared with another group. First, suppose  $g'$  does not have any suboptimal arms. Then, all arms available to group  $g'$  is optimal, so group  $g'$  will incur zero regret regardless of the algorithm. Hence, the utility gain for group  $g'$  is exactly 0, and therefore  $W(\pi, \mathcal{I}) = -\infty$  for any  $\pi$ .

Next, suppose  $g'$  does have a suboptimal arm but it is not shared. Let  $\pi$  be a consistent policy. Then from the following upper bound on Nash SW from Section 3.2,

$$W(\pi, \mathcal{I}) \leq \liminf_{T \rightarrow \infty} \sum_{g \in \mathcal{G}} \log \left( \sum_{a \in \mathcal{A}^g} \Delta^g(a) (J^g(a) - q_T^g(a, \pi)J(a)) \right)^+.$$

Since  $g'$  is the only group with access to arm  $a$  for every  $a \in \mathcal{A}_{\text{sub}}^{g'}$ , it must be that  $q_T^{g'}(a, \pi) = 1$  for every  $a \in \mathcal{A}_{\text{sub}}^{g'}$ . Moreover,  $J^{g'}(a) = J(a)$  for every  $a \in \mathcal{A}_{\text{sub}}^{g'}$ . This implies that the term corresponding to  $g'$  in the sum equals  $\log 0 = -\infty$ . Therefore,  $W(\pi, \mathcal{I}) = -\infty$  for any  $\pi \in \Psi$ .  $\square$

### G.3 Omitted Details of Theorem 3.2

We provide details on the two steps in Section 3.2 starting from (9). (4) implies that for every  $\varepsilon > 0$ , there exists a  $T_\varepsilon$  such that if  $T \geq T_\varepsilon$ , then

$$\frac{\mathbb{E}[N_T(a)]}{\log T} \geq (1 - \varepsilon)J(a).$$

Therefore, for large enough  $T$ , plugging into (9), we get

$$\frac{R_T^g(\pi, \mathcal{I})}{\log T} \geq \sum_{a \in \mathcal{A}_{\text{sub}}} \Delta^g(a) q_T^g(a, \pi) J(a) (1 - \varepsilon).$$

This implies that

$$\limsup_{T \rightarrow \infty} \frac{R_T^g(\pi, \mathcal{I})}{\log T} \geq \limsup_{T \rightarrow \infty} (1 - \varepsilon) \sum_{a \in \mathcal{A}_{\text{sub}}} \Delta^g(a) q_T^g(a, \pi) J(a).$$

Since this holds for every  $\varepsilon > 0$  and the RHS is continuous in  $\varepsilon$ ,

$$(24) \quad \limsup_{T \rightarrow \infty} \frac{R_T^g(\pi, \mathcal{I})}{\log T} \geq \limsup_{T \rightarrow \infty} \sum_{a \in \mathcal{A}_{\text{sub}}} \Delta^g(a) q_T^g(a, \pi) J(a).$$

Plugging in (24) into the definition of  $\text{UtilGain}^g(\pi, \mathcal{I})$  gives

$$\text{UtilGain}^g(\pi, \mathcal{I}) \leq \liminf_{T \rightarrow \infty} \sum_{a \in \mathcal{A}_{\text{sub}}^g} \Delta^g(a) (J^g(a) - q_T^g(a, \pi)J(a) \mathbf{1}\{a \in \mathcal{A}_{\text{sub}}\}).$$

Using the definition of  $W(\pi, \mathcal{I})$  and taking the  $\liminf$  outside of the sum gives

$$W(\pi, \mathcal{I}) \leq \liminf_{T \rightarrow \infty} \sum_{g \in \mathcal{G}} \log \left( \sum_{a \in \mathcal{A}_{\text{sub}}^g} \Delta^g(a) (J^g(a) - q_T^g(a, \pi)J(a) \mathbf{1}\{a \in \mathcal{A}_{\text{sub}}\}) \right)^+.$$

### G.4 Proof of Proposition E.1

*Proof.* First, we prove the statement with respect to the variables  $(s^g)_{g \in \mathcal{G}}$ . Let  $f_s(s) = \sum_{g \in \mathcal{G}} \log s^g$ , and let  $s_*^g = \sum_{a \in \mathcal{A}^g} \Delta^g(a) (J^g(a) - q_*^g(a)J(a))$  and  $\hat{s}_t^g = \sum_{a \in \mathcal{A}^g} \hat{\Delta}^g(a) (\hat{J}_t^g(a) - \hat{q}_t^g(a)\hat{J}_t(a))$ . Since  $f_s$  is strictly concave with respect to  $s$ ,  $s_*^g$  is unique. Define the event  $H_t(\delta) = \{\hat{\theta}_t(a) \in [\theta(a) - \delta, \theta(a) + \delta] \text{ for all } a \in \mathcal{A}\}$ .

1039 **Lemma G.2.** For any  $\varepsilon > 0$ , there exists  $\delta > 0$  such that if  $H_t(\delta)$ , then  $\hat{s}_t^g \in [s_*^g - \varepsilon, s_*^g + \varepsilon]$  for all  
 1040  $g \in \mathcal{G}$ .

1041 This shows that if  $H_t(\delta)$ , then the variables  $\hat{s}_t^g$  are close to  $s_*^g$  for all  $g$ . Next, we need to show that  
 1042 the corresponding  $q$ 's are also close. Let  $\text{proj}(z, P)$  be the projection of point  $z$  onto a polytope  $P$ .

1043 Let  $Q = \{q : \sum_{g \in \mathcal{G}} q^g(a) = 1 \ \forall a \in \mathcal{A}_{\text{sub}}, q^g(a) = 0 \ \forall g \in G, a \notin \mathcal{A}_{\text{sub}}, q^g(a) \geq 0 \ \forall g \in$   
 1044  $G, a \in \mathcal{A}\}$  be the feasible space. Let  $S^g(q, \tilde{\theta}) = \sum_{a \in \mathcal{A}^g} \tilde{\Delta}^g(a) (\tilde{J}^g(a) - q^g(a) \tilde{J}(a))$ , where  
 1045  $\tilde{\Delta}^g(a)$ ,  $\tilde{J}^g(a)$ , and  $\tilde{J}(a)$  are computed with  $\tilde{\theta}$ .

1046 Given  $s = (s^g)_{g \in \mathcal{G}}$ , let  $Q(s, \tilde{\theta}) = \{q^g(a) \in Q : S^g(q, \tilde{\theta}) = s^g\}$  be the set of all feasible  $q$ 's that  
 1047 corresponds to the solution  $s$  under the parameters  $\tilde{\theta}$ . Note that  $Q(s, \tilde{\theta})$  is a linear polytope, and we  
 1048 can write it as  $Q(s, \tilde{\theta}) = \{q : A(\tilde{\theta})q = b(s), q \geq 0\}$  for a matrix  $A(\tilde{\theta})$  and a vector  $b(s)$ . We are  
 1049 interested in the polytopes  $Q(s, \theta)$  and  $Q(\hat{s}_t, \hat{\theta}_t)$ , which correspond the optimal solutions of  $(P(\theta))$   
 1050 and  $(\hat{P}_t)$  respectively. The next two lemmas state that these polytypes are close together:

1051 **Lemma G.3.** Let  $\varepsilon > 0$ . There exists  $\delta > 0$  such that if  $H_t(\delta)$ , for any  $\hat{q} \in Q(\hat{s}_t, \hat{\theta}_t)$ ,  
 1052  $\|\text{proj}(\hat{q}, Q(s, \theta)) - \hat{q}\|_2 \leq \varepsilon$ .

1053 **Lemma G.4.** Let  $\varepsilon > 0$ . There exists  $\delta > 0$  such that if  $H_t(\delta)$ , for any  $q \in Q(s, \theta)$ ,  
 1054  $\|\text{proj}(q, Q(\hat{s}_t, \hat{\theta}_t)) - q\|_2 \leq \varepsilon$ .

1055 Let  $q_* = \text{argmin}_{q \in Q(s, \theta)} \|q\|_2^2$ ,  $\hat{q} = \text{argmin}_{q \in Q(\hat{s}_t, \hat{\theta}_t)} \|q\|_2^2$ . Our goal is to show  $\|q_* - \hat{q}\|_1 \leq \varepsilon$ .  
 1056 Let  $R(\eta) = \{q \in Q(s, \theta) : \|q\|_2 \leq \|q_*\|_2 + \eta\}$  for  $\eta > 0$ . Since the function  $\|\cdot\|_2^2$  is strongly  
 1057 convex and  $q_*$  is minimizer, we have the following result:

1058 **Claim G.5.** For every  $\varepsilon > 0$ , there exists  $\eta > 0$  such that if  $q \in R(\eta)$ , then  $\|q - q_*\|_2 \leq \varepsilon$ .

1059 First, assume  $\|\hat{q}_t\|_2 \leq \|q_*\|_2$ . Let  $\eta > 0$  be from Claim G.5 using  $\varepsilon = \frac{\varepsilon}{2}$ . Let  $\delta > 0$  be from  
 1060 Lemma G.3 using  $\varepsilon = \min\{\frac{\varepsilon}{2}, \eta\}$ . Let  $q' = \text{proj}(\hat{q}, Q(s, \theta)) \in Q(s, \theta)$ . From Lemma G.3,  
 1061  $\|\hat{q}_t - q'\|_2 \leq \eta$ , implying  $\|q'\|_2 \leq \|\hat{q}_t\|_2 + \eta \leq \|q_*\|_2 + \eta$ . Therefore,  $q' \in R(\eta)$ . Claim G.5  
 1062 implies  $\|q' - q_*\|_2 \leq \frac{\varepsilon}{2}$ . Let  $\delta > 0$  correspond to  $\frac{\varepsilon}{2}$  from Lemma G.3, so that  $\|\hat{q}_t - q'\|_2 \leq \frac{\varepsilon}{2}$ . Then,

$$\|\hat{q}_t - q_*\|_2 \leq \|\hat{q}_t - q'\|_2 + \|q' - q_*\|_2 \leq \varepsilon.$$

1063 An analogous argument shows the same result in the case that  $\|q_*\|_2 \leq \|\hat{q}_t\|_2$  using Lemma G.4.

1064 □

#### 1065 G.4.1 Proof of Lemmas

1066 We first state an additional lemma:

1067 **Lemma G.6.** For any  $\varepsilon > 0$  there exists a  $\delta > 0$  such that if  $H_t(\delta)$ , then for any feasible solution  $q$ ,  
 1068  $|f(q) - \hat{f}(q)| < \varepsilon$ .

1069 *Proof of Lemma G.6.* Let  $q$  be a feasible solution. Let  $S^g(q, \tilde{\theta}) =$   
 1070  $\sum_{a \in \mathcal{A}^g} \tilde{\Delta}^g(a) (\tilde{J}^g(a) - q^g(a) \tilde{J}(a))$ , where  $\tilde{\Delta}^g(a)$ ,  $\tilde{J}^g(a)$ , and  $\tilde{J}(a)$  are computed with  
 1071  $\tilde{\theta}$ .

1072 For each  $g$ , let  $\varepsilon_g > 0$  be such that if  $|\tilde{s}^g - s_*^g| \leq \varepsilon_g$ , then  $|\log s_*^g - \log \tilde{s}^g| \leq \frac{\varepsilon}{G}$ .  $\Delta^g(a)$ ,  $J^g(a)$ , and  
 1073  $J(a)$  are all differentiable functions of  $\theta$  with finite derivatives around  $\theta_*$ . Then, it is possible to find  
 1074  $\delta_g > 0$  such that if  $H_t(\delta_g)$ ,  $|\hat{\Delta}^g(a) (\hat{J}^g(a) - q^g(a) \hat{J}(a)) - \Delta^g(a) (J^g(a) - q^g(a) J(a))| \leq \frac{\varepsilon_g}{|\mathcal{A}|}$ .  
 1075 Summing over actions,  $|S^g(q, \hat{\theta}_t) - S^g(q, \hat{\theta})| \leq \varepsilon_g$ . Then, if  $H_t(\delta_g)$ ,  $|\log S^g(q, \hat{\theta}) - \log S^g(q, \theta)| \leq$   
 1076  $\frac{\varepsilon}{G}$ . Take  $\delta = \min_{g \in \mathcal{G}} \delta_g$ . If  $H_t(\delta)$  is true,  $|f(q) - \hat{f}(q)| < \varepsilon$ . □

1077 *Proof of Lemma G.2.* Let  $\varepsilon > 0$ . Let  $S_\varepsilon = \{s : |s^g - s_*^g| \leq \varepsilon \ \forall g\}$  be the set around  $s_*$  of interest.  
 1078 Our goal is to show that  $f_s(\hat{s}) \in S_\varepsilon$ . Let  $f_{\text{bd}} = \max\{f(s) : s \in \text{bd}(S_\varepsilon)\} < f^*$  be the largest  $f$  on  
 1079 the boundary of  $S_\varepsilon$ . Then, if  $f_s(s) > f_{\text{bd}}$ , it must be that  $s \in S_\varepsilon$ . (Since the entire line between  
 1080  $s$  and  $s_*$  must have a value of  $f_s$  that is higher than  $f_s(s)$  due to concavity, and it must cross the

boundary.) Therefore, we need to show  $f_s(\hat{s}_t) > f_{\text{bd}}$ . Let  $\hat{q}_t$  be the corresponding solution to  $\hat{s}_t$ . Then,  $f_s(\hat{s}_t) = \hat{f}_t(\hat{q}_t)$ . Let  $\delta > 0$  as in Lemma G.6 with  $\varepsilon = f^* - f_{\text{bd}}$ . Then, if  $H_t(\delta)$  is true,

$$f_s(\hat{s}_t) = \hat{f}_t(\hat{q}_t) \geq \hat{f}_t(q_*) \geq f(q_*) - (f^* - f_{\text{bd}}) = f_{\text{bd}},$$

where the second inequality follows from Lemma G.6.

□

*Proof of Lemma G.3.* Let  $\varepsilon > 0$ . Let  $n$  be the dimension of  $q$ . We will make use of the following closed form formula for the projection onto a linear subspace:

**Fact G.7.** Let  $P = \{x : Ax = b\}$ . The orthogonal projection of  $z$  onto  $P$  is  $\text{proj}(z, P) = z - A^\top(AA^\top)^{-1}(Az - b)$ .

Let  $Q = Q(s, \tilde{\theta})$ , and let  $A, b$  be the corresponding parameters of the linear constraints; i.e.  $Q = \{x : Ax = b, x \geq 0\}$ . Similarly, let  $\hat{Q} = Q(\hat{s}_t, \hat{\theta}_t)$ , and let  $\hat{A}, \hat{b}$  be defined similarly. Note that Fact G.7 only works with equality constraints.

We define a distance between two linear polytopes. We use the notation  $P(D, f) = \{x : Dx = f\}$ . Then,  $Q = P(A, b)$ ,  $\hat{Q} = P(\hat{A}, \hat{b})$ .

**Definition G.8.** For two polytopes  $P(A, b)$  and  $P(A', b')$ , the distance is defined as  $d(P(A, b), P(A', b')) = \max\{\|A - A'\|_2, \|b - b'\|_2\}$ .

Note that for every  $\alpha > 0$ , there exists  $\delta > 0$  such that  $H_t(\delta)$  implies  $d(Q, \hat{Q}) \leq \alpha$  using Lemma G.2. For any  $\mathcal{I} \in 2^{[n]}$ , let  $P_{\mathcal{I}} = P(A_{\mathcal{I}}, b_{\mathcal{I}}) = \{x : Ax = b, x_i = 0 \forall i \in \mathcal{I}\}$ .

**Claim G.9.** There exists a constant  $C \geq 1$  such that for any  $\mathcal{I} \in 2^{[n]}$  and any  $\tilde{A}, \tilde{b}$  of same dimensions as  $A_{\mathcal{I}}, b_{\mathcal{I}}$ , if  $\tilde{q} \in P(\tilde{A}, \tilde{b})$  with  $\tilde{q} \leq 1$  (for all elements), then  $\|\tilde{q} - \text{proj}(\tilde{q}, P_{\mathcal{I}})\|_2 \leq Cd(P_{\mathcal{I}}, P(\tilde{A}, \tilde{b}))$ .

*Proof of Claim G.9.* From Fact G.7, we have  $\|\tilde{q} - \text{proj}(\tilde{q}, P_{\mathcal{I}})\|_2 = \|A_{\mathcal{I}}^\top(A_{\mathcal{I}}A_{\mathcal{I}}^\top)^{-1}(A_{\mathcal{I}}\tilde{q} - b_{\mathcal{I}})\|_2$ . Since  $\tilde{q} \in P(\tilde{A}, \tilde{b})$ ,  $\tilde{A}\tilde{q} = \tilde{b}$ . Let  $\lambda = \max_{\mathcal{I}} \|A_{\mathcal{I}}^\top(A_{\mathcal{I}}A_{\mathcal{I}}^\top)^{-1}\|_2$  and let  $d = d(P_{\mathcal{I}}, P(\tilde{A}, \tilde{b}))$ . Therefore,

$$\begin{aligned} \|\tilde{q} - \text{proj}(\tilde{q}, P_{\mathcal{I}})\|_2 &\leq \lambda \|(A_{\mathcal{I}} - \tilde{A})\tilde{q} + (\tilde{b} - b_{\mathcal{I}})\|_2 \\ &\leq \lambda \left( \|A_{\mathcal{I}} - \tilde{A}\|_2 \|\tilde{q}\|_2 + \|\tilde{b} - b_{\mathcal{I}}\|_2 \right) \\ &\leq 2\lambda nd. \end{aligned}$$

Therefore,  $C = 2\lambda n$ . □

We now describe an iterative process to prove this result.

Let  $Q^0 = \{q : Aq = b\}$  ( $Q$  without the non-negativity constraint), and same with  $\hat{Q}^0 = \{q : \hat{A}q = \hat{b}\}$ . Let  $\alpha_0 = d(Q^0, \hat{Q}^0)$ . Let  $\tilde{q}^0 = \text{proj}(\hat{q}, Q^0)$ . By Claim G.9,  $\|\hat{q} - \tilde{q}^0\|_2 \leq C\alpha_0$ . If  $\tilde{q}^0 \geq 0$ , then STOP here.

Otherwise, find an index  $i$  which violates the non-negativity constraint using the following method:

- Let  $q \in Q$  be an arbitrary feasible point ( $q \geq 0$ ).
- From the point  $\tilde{q}^0$ , move along the direction towards  $q$ . Let  $p^0$  be the first point on this line where  $p^0$  is non-negative.
- Since  $Q$  is simply  $Q^0$  with non-negativity constraints and both sets are convex,  $p^0 \in Q$ .
- Let  $i$  be an index where  $\tilde{q}_i^0 < 0$  and  $p_i^0 = 0$  (the last index to become non-negative).

Since  $\hat{q} \geq 0$ , it must be that  $\hat{q}_i \leq C\alpha_0$  since  $\|\hat{q} - \tilde{q}^0\|_2 \leq C\alpha_0$ .

Let  $Q^1$  be the same polytope as  $Q^0$ , but with the additional constraint that  $q_i = 0$  — call this constraint  $C$ . Let  $A^1, b^1$  be the corresponding equality constraints for  $Q^1$ . Let  $\hat{Q}^1$  be the same polytope as  $\hat{Q}$ , but with the additional equality constraint that  $q_i = \hat{q}_i$  — call this constraint  $\hat{C}$ . Let  $\hat{A}^1, \hat{b}^1$  be the equality constraints for  $\hat{Q}^1$ . Note that the only difference between constraints  $C$  and  $\hat{C}$  is the right hand side,

1119 which differ by at most  $C\alpha_0$ . Therefore,  $d(Q^1, \hat{Q}^1) \leq d(Q^0, \hat{Q}^0) + C\alpha_0 \leq 2C\alpha_0$ . Clearly,  $\hat{q} \in \hat{Q}^1$ .  
 1120 Let  $\tilde{q}^1 = \text{proj}(\hat{q}, Q^1)$ . Applying Claim G.9 again, we have  $\|\hat{q} - \tilde{q}^1\|_2 \leq C(2C\alpha_0) = 2C^2\alpha_0$ . If  
 1121  $\tilde{q}^1 \geq 0$ , then STOP here.

1122 Otherwise, let  $j$  be the index which violates the non-negativity constraint found using the same  
 1123 method as before; except this time, we draw a line between  $\tilde{q}^1$  towards  $p^0 \in Q$ . We let  $p^1$  be the first  
 1124 point where  $p^1 \geq 0$ . Then, we repeat the above process. We define  $Q^2$  to be the same polytope as  $Q^1$ ,  
 1125 with the additional constraint that  $q_j = 0$ .  $\hat{Q}^2$  is defined as  $\hat{Q}^1$  with the additional constraint  $q_j = \hat{q}_j$ .  
 1126 Then,  $\hat{q}_j \leq 2C^2\alpha_0$ . Therefore,  $d(Q^2, \hat{Q}^2) \leq d(Q^1, \hat{Q}^1) + 2C^2\alpha_0 \leq 2C\alpha_0 + 2C^2\alpha_0 \leq 4C^2\alpha_0$ .  
 1127 Applying Claim G.9, we get  $\|\hat{q} - \tilde{q}^2\|_2 \leq C(4C^2\alpha_0) = 4C^3\alpha_0$ . If  $\tilde{q}^2 \geq 0$ , then STOP here.

1128 **After stopping:** If this process stopped at iteration  $m$ , then  $\tilde{q}^m \in Q$  and  $\|\hat{q} - \tilde{q}^m\|_2 \leq 2^m C^{m-1} \alpha_0$ .  
 1129 It must be that  $m \leq n$ . If  $\alpha_0 = \frac{\varepsilon}{2^n C^{n-1}}$ , then  $\|\hat{q} - \tilde{q}^m\|_2 \leq \varepsilon$ . Then,  $\|\text{proj}(\hat{q}, Q) - \hat{q}\|_2 \leq \varepsilon$ . Let  
 1130  $\delta > 0$  such that  $H_t(\delta)$  implies  $d(Q, \hat{Q}) \leq \alpha_0$ .  $\square$

1131 *Proof of Lemma G.4.* This proof follows essentially the same steps as the proof of Lemma G.3 by  
 1132 swapping  $Q$  and  $\hat{Q}$ . The main difference is that we are projecting  $q$  onto  $Q(\hat{s}_t, \hat{\theta}_t)$ , but this must hold  
 1133 for all possible values of  $\hat{s}_t, \hat{\theta}_t$  (using a single  $\delta$ ). Due to this, the only thing we have to change from  
 1134 the proof of Lemma G.3 is Claim G.9. We must show that there exists a constant  $C$  where Claim G.9  
 1135 is satisfied for all possible values of  $\hat{s}_t, \hat{\theta}_t$ . The only place where  $C$  relies on a property of the polytope  
 1136  $P_{\mathcal{I}}$  is in choosing  $\lambda$ . Therefore our goal is to uniformly upper bound  $\max_{\mathcal{I}} \|\hat{A}_{\mathcal{I}}^{\top} (\hat{A}_{\mathcal{I}} \hat{A}_{\mathcal{I}}^{\top})^{-1}\|_2$  for  
 1137 all possible  $\hat{A}_{\mathcal{I}}$  that can be induced by all possible  $\hat{s}_t, \hat{\theta}_t$ .

1138 Note that since we assume that  $H_t(\delta_0)$  holds, the possible matrices  $\hat{A}$  lie in a compact space (since  
 1139 every element of the matrix  $\hat{A}$  can be at most  $\delta_0$  apart). Since  $\|A^{\top} (AA^{\top})^{-1}\|_2$  is a continuous  
 1140 function of the elements of the matrix  $A$ ,  $\lambda_1 = \max_{\hat{A}} \|\hat{A}^{\top} (\hat{A} \hat{A}^{\top})^{-1}\|_2$  exists. Moreover, for any  
 1141  $\mathcal{I}$ ,  $\|\hat{A}_{\mathcal{I}}^{\top} (\hat{A}_{\mathcal{I}} \hat{A}_{\mathcal{I}}^{\top})^{-1}\|_2 \leq C(n) \|\hat{A}^{\top} (\hat{A} \hat{A}^{\top})^{-1}\|_2$  for a constant  $C(n)$ . Therefore, by replacing  $\lambda$  with  
 1142  $\lambda_1 C(n)$ , Claim G.9 holds.  $\square$
